# Supplementary material for: Water stable fluorescent organotin(iv) compounds: aggregation induced emission enhancement and recognition of lead ions in an aqueous system
Source: Royal Society of Chemistry journal article supplement (doi:10.1039/d1nj04612h), 2021-11-20
Supplement: d1nj04612h1.pdf [file d1nj04612h1.pdf]

## **SUPPLEMENTARY DATA**

### **Water stable fluorescent organotin(IV) compounds: Aggregation induced emission enhancement and recognition of lead ions in aqueous system**

Kulwinder Kaur<sup>a</sup>, Raghubir Singh<sup>b</sup>, Varinder Kaur<sup>a\*</sup>, Neena Capalash<sup>c</sup>

<sup>a</sup>Department of Chemistry, Panjab University, Sector-14, Chandigarh-160014, India

*E-mail:* [var\\_ka04@yahoo.com](mailto:var_ka04@yahoo.com)

<sup>b</sup>Department of Chemistry, DAV College, Sector 10, Chandigarh-160011, India

*E-mail:* [raghu\\_chem2006@yahoo.com](mailto:raghu_chem2006@yahoo.com)

<sup>c</sup>Department of Biotechnology, Panjab University, Chandigarh-160014, India

*E-mail:* [caplash@pu.ac.in](mailto:caplash@pu.ac.in)

### **Table of Contents**

|             |                                                  |              |
|-------------|--------------------------------------------------|--------------|
| <b>1.</b>   | <b>Results and discussion</b>                    | <b>2-22</b>  |
| <b>2.</b>   | <b>Spectral data</b>                             |              |
| <b>2.1.</b> | <b>FT-IR spectra of compounds</b>                | <b>23-28</b> |
| <b>2.2.</b> | <b><sup>1</sup>H-NMR spectra of compounds</b>    | <b>29-34</b> |
| <b>2.3.</b> | <b><sup>13</sup>C-NMR spectra of compounds</b>   | <b>35-40</b> |
| <b>2.4.</b> | <b><sup>119</sup>Sn-NMR spectra of compounds</b> | <b>41-46</b> |
| <b>2.5.</b> | <b>ESI-MS spectra of compounds</b>               | <b>47-52</b> |

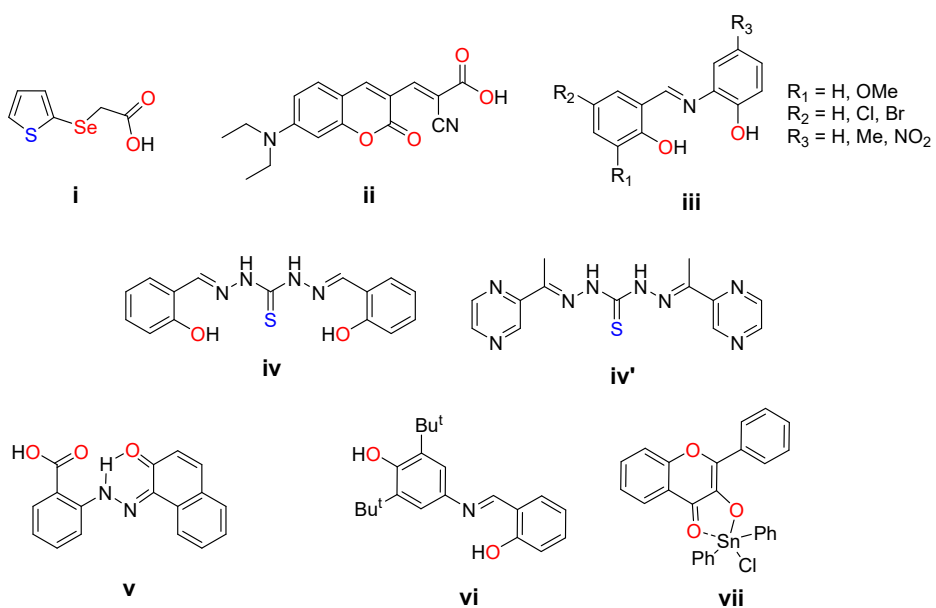

**Chart S1.** Some of the ligating systems for deriving organotin compounds (**i-vi**), and 3-hydroxy-4*H*-chromen-4-one based organotin compound (**vii**) for selective fluorometric detection of pyrophosphate.

## 1. Results and discussion

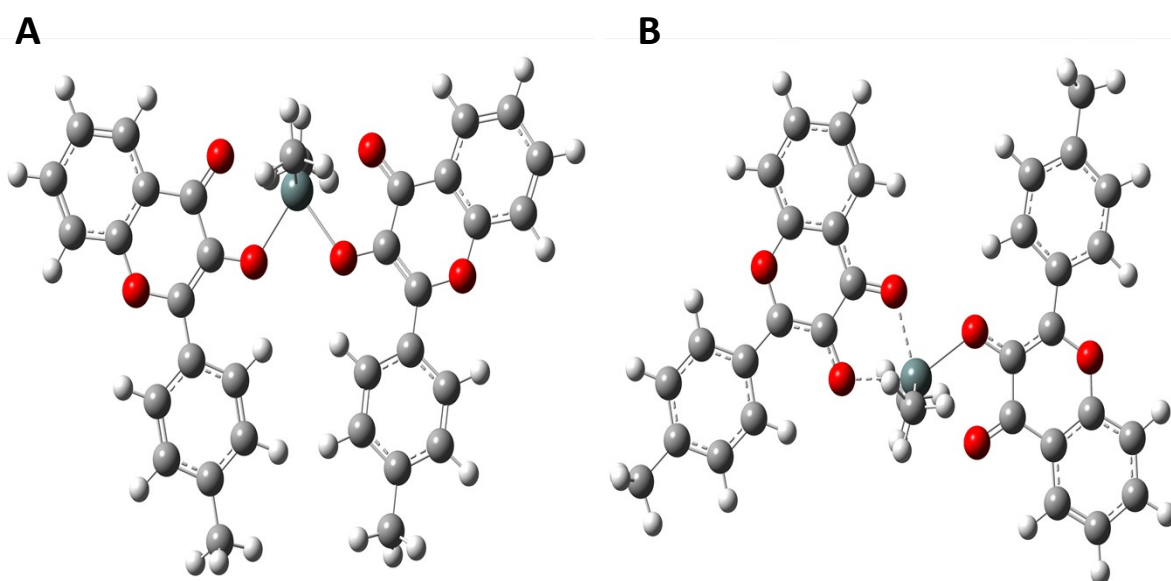

**Figure S1.** Geometry-optimized (B3LYP/DGDZVP) structures of compound **4b**. Sn-O<sub>(keto)</sub> and Sn-O<sub>(hydroxyl)</sub> bonds; (**A**) in *cis*-configuration (**B**) in *trans* configuration.

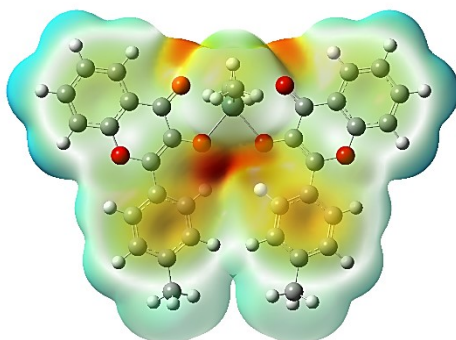

**Figure S2.** MEP diagram for 4b: The red, orange, yellow, green, and blue are standard colors for representing the magnitude of electrostatic potential. They are arranged in the order like, blue > green > yellow > orange > red, where the highest electropositive potential is indicated by blue region and most electronegative potential by red region.

**Table S1.** Calculated coordinates of **4b-(A)** *cis*-configured Sn-O<sub>(keto)</sub> and Sn-O<sub>(hydroxyl)</sub> bonds with B3LYP/DGDZVP on Sn, H, C, and O.

0,1

| atom | x             | y             | z             |
|------|---------------|---------------|---------------|
| Sn   | 0.0000326553  | -1.9318220007 | 0.0001189831  |
| O    | -1.3623862026 | -0.2864065701 | 0.0218632969  |
| O    | -4.9514985553 | 0.2581763729  | -0.0051455026 |
| O    | 1.3623827798  | -0.2863585028 | -0.0212046092 |
| O    | 4.9515001644  | 0.2582257554  | 0.0050161796  |
| O    | -2.2816299754 | -2.809039615  | -0.1667913    |
| O    | 2.2816663931  | -2.8090044334 | 0.1667828555  |
| C    | 3.3450069793  | 1.9610096077  | -0.2676849178 |
| C    | -2.6707808095 | -0.4974747563 | -0.0118160729 |
| C    | -3.3450484262 | 1.9609463773  | 0.2678746746  |
| C    | 2.6707886973  | -0.4974185273 | 0.0121070658  |
| C    | -5.4239517465 | -1.0030131841 | -0.1531217801 |
| C    | -3.6039598001 | 0.5303233708  | 0.0774444966  |
| C    | -3.131366756  | -1.8741673852 | -0.1340511014 |
| C    | -4.5593496204 | -2.1082537238 | -0.2152828863 |
| C    | 3.6039460967  | 0.5303859012  | -0.0773122516 |
| C    | 5.4239822025  | -1.00297502   | 0.1527945489  |
| C    | 3.1313989327  | -1.874128247  | 0.1340554154  |
| C    | 4.5593955006  | -2.1082252373 | 0.214998672   |
| C    | -6.8177641853 | -1.1626847039 | -0.2327380827 |
| H    | -7.4572437753 | -0.286345646  | -0.179243849  |
| C    | 5.1140131679  | -3.4011401294 | 0.3594286602  |
| H    | 4.4344025944  | -4.2466742903 | 0.4066282896  |
| C    | -2.9116981877 | 4.7457444066  | 0.7022624505  |
| C    | 4.4079683195  | 2.8899399614  | -0.1875368411 |
| H    | 5.410040558   | 2.5418323342  | 0.03711364    |
| C    | 6.8178083268  | -1.1626500398 | 0.2321620236  |
| H    | 7.4572773523  | -0.2863044588 | 0.1786479742  |
| C    | 2.0581273014  | 2.4581406848  | -0.5674195062 |
| H    | 1.224754441   | 1.7712981653  | -0.6363177869 |
| C    | -5.1139395533 | -3.4011560895 | -0.359937638  |
| H    | -4.4343178919 | -4.2466831789 | -0.4071034056 |
| C    | -4.4079221614 | 2.889921662   | 0.1871314456  |
| H    | -5.4098945128 | 2.541846901   | -0.0380194795 |
| C    | -7.3388945779 | -2.4410535499 | -0.3756255902 |
| H    | -8.4158605619 | -2.5748388063 | -0.4378208951 |
| C    | -2.0583016998 | 2.4580229866  | 0.5682573502  |
| H    | -1.2249998311 | 1.7711396079  | 0.6376178459  |
| C    | -6.4865733067 | -3.566680958  | -0.4396481704 |
| H    | -6.9124120761 | -4.5600719895 | -0.5516355957 |
| C    | 2.9115715316  | 4.7458124136  | -0.7019872325 |
| C    | -1.8595336275 | 3.822428623   | 0.7859404545  |
| H    | -0.8588662488 | 4.1706442382  | 1.0341436616  |
| C    | -4.1901831777 | 4.2485543276  | 0.3962394567  |
| H    | -5.030673627  | 4.9370211728  | 0.3262826588  |
| C    | 6.4866614095  | -3.5666684858 | 0.4388904365  |

|   |               |               |               |
|---|---------------|---------------|---------------|
| H | 6.9125219963  | -4.5600693021 | 0.5507074372  |
| C | 4.1901898976  | 4.2485716905  | -0.3966042656 |
| H | 5.0307532222  | 4.9369978069  | -0.3271212931 |
| C | -0.1039499608 | -2.6526072682 | 2.0326437321  |
| H | 0.7226145901  | -2.2299320844 | 2.608418893   |
| H | -0.0190502679 | -3.7422388473 | 2.0359252807  |
| H | -1.0585541476 | -2.3625755534 | 2.4768401033  |
| C | 1.8593170955  | 3.822545991   | -0.785063825  |
| H | 0.8585342544  | 4.170798357   | -1.0327472704 |
| C | 0.1039477357  | -2.6519988434 | -2.0326294052 |
| H | -0.7223455355 | -2.2287032845 | -2.6083434612 |
| H | 0.0184766365  | -3.7415840855 | -2.0363001091 |
| H | 1.0587354202  | -2.3622953776 | -2.476643529  |
| C | 7.3389671797  | -2.4410317417 | 0.3748358244  |
| H | 8.4159442414  | -2.5748181786 | 0.4368369415  |
| C | 2.6822455613  | 6.2255518194  | -0.9105920809 |
| H | 2.6341907285  | 6.7555787918  | 0.0491406782  |
| H | 1.7431692265  | 6.4149738178  | -1.4387894199 |
| H | 3.4937875791  | 6.6790095669  | -1.4894447016 |
| C | -2.6823983921 | 6.2254861383  | 0.9108809188  |
| H | -3.4943363124 | 6.6790828007  | 1.4890666684  |
| H | -2.6335694977 | 6.7553990766  | -0.0488768764 |
| H | -1.7437017607 | 6.4148843688  | 1.4397617187  |

**Table S2.** Calculated coordinates of **4b-(B)** *trans*-configured Sn-O<sub>(keto)</sub> and Sn-O<sub>(hydroxyl)</sub> bonds with B3LYP/DGDZVP on Sn, H, C, and O.

0,1

| atom | x             | y             | z             |
|------|---------------|---------------|---------------|
| Sn   | 0.0741172753  | -1.0552787371 | -0.0000073724 |
| O    | 2.3817726802  | -1.0139617577 | 0.0003253839  |
| O    | 4.7233488728  | 1.7616385622  | 0.0001854272  |
| O    | -1.7813542803 | 0.0240048684  | -0.0001214875 |
| O    | -5.3377408496 | -0.6998493117 | 0.0003708514  |
| O    | 0.7107236199  | 1.0642570472  | -0.0000361216 |
| O    | -1.7764436355 | -2.6735621679 | -0.0002662421 |
| C    | -4.4145855956 | 1.4693747923  | 0.000380126   |
| C    | 2.899434099   | 0.1844008165  | 0.0002239694  |
| C    | 5.3710110817  | -0.5042587511 | 0.0004865279  |
| C    | -2.934870262  | -0.6259014335 | 0.0000408777  |
| C    | 3.8817184719  | 2.8193035333  | -0.0000037758 |
| C    | 4.2753293688  | 0.462871501   | 0.0002956776  |
| C    | 1.9731221677  | 1.3004489441  | 0.0000289969  |
| C    | 2.4851520026  | 2.6431894804  | -0.0000905687 |
| C    | -4.1657524537 | 0.024282942   | 0.0002588661  |
| C    | -5.3475933983 | -2.0542643156 | 0.0002810558  |
| C    | -2.8939710338 | -2.0835719263 | -0.0000645869 |
| C    | -4.1557876159 | -2.7975858848 | 0.0000553759  |
| C    | 4.4559339652  | 4.1021721239  | -0.0001124803 |
| H    | 5.5376769039  | 4.199702375   | -0.0000402152 |

|   |               |               |                |
|---|---------------|---------------|----------------|
| C | -4.2327422325 | -4.2097749401 | -0.0000273922  |
| H | -3.3038176166 | -4.7720132415 | -0.0001992859  |
| C | 7.5377898628  | -2.3585752011 | 0.0008504815   |
| C | -5.7393861884 | 1.9588739778  | 0.0006471011   |
| H | -6.5702240601 | 1.2623640728  | 0.0007639349   |
| C | -6.601788292  | -2.6882557287 | 0.000420035    |
| H | -7.5034801166 | -2.082655938  | 0.0005907634   |
| C | -3.3637345048 | 2.4163760386  | 0.0002484701   |
| H | -2.3386780066 | 2.069848262   | 0.0000568361   |
| C | 1.6540166478  | 3.7915383687  | -0.0002958644  |
| H | 0.5784523039  | 3.6451790792  | -0.0003659837  |
| C | 6.7158516079  | -0.0616681692 | 0.0005320165   |
| H | 6.9321974814  | 1.0009624957  | 0.0004247822   |
| C | 3.6212595973  | 5.2096939758  | -0.0003118005  |
| H | 4.0552522029  | 6.2061994322  | -0.0003990404  |
| C | 5.1368191002  | -1.8969941577 | 0.0006280296   |
| H | 4.1172443869  | -2.259106655  | 0.0005941116   |
| C | 2.2143984105  | 5.0559340945  | -0.000405265   |
| H | 1.5771982315  | 5.9360909864  | -0.0005639442  |
| C | -4.9604644446 | 4.2700406609  | 0.0006348871   |
| C | 6.2059483014  | -2.7949582331 | 0.0008047779   |
| H | 5.9933143409  | -3.8622913355 | 0.0009082379   |
| C | 7.7680223859  | -0.9704749217 | 0.0007090669   |
| H | 8.7909777347  | -0.597565713  | 0.0007362827   |
| C | -5.464905729  | -4.8419492541 | 0.00011023     |
| H | -5.5233917861 | -5.9269952219 | 0.0000513072   |
| C | -6.0004274199 | 3.3282197043  | 0.0007715983   |
| H | -7.0337376758 | 3.669943795   | 0.0009851636   |
| C | 0.2400875005  | -1.6669545104 | -2.0642976436  |
| H | -0.740188682  | -1.6230532742 | -2.5434336061  |
| H | 0.6153656175  | -2.6928750322 | -2.1043148716  |
| H | 0.945550285   | -1.0113697432 | -2.579787008   |
| C | -3.643808326  | 3.7815083372  | 0.0003764618   |
| H | -2.8141996419 | 4.48700969    | 0.0002796571   |
| C | 0.2396544182  | -1.667043508  | 2.0643008111   |
| H | 0.9445456259  | -1.011087252  | 2.5800992679   |
| H | 0.6155454132  | -2.6927385887 | 2.1043618912   |
| H | -0.7408123514 | -1.6237550469 | 2.5430997286   |
| C | -6.652214427  | -4.0751797582 | 0.0003342481   |
| H | -7.6177733651 | -4.5745378708 | 0.0004406404   |
| C | -5.2381962967 | 5.7562804542  | 0.0007047246   |
| H | -4.804222728  | 6.2411599447  | -0.8816629573  |
| H | -4.8027323432 | 6.2413716263  | 0.8822155318   |
| H | -6.3120078944 | 5.964282994   | 4,0.0015750127 |
| C | 8.6927739429  | -3.3337144005 | 0.0010591455   |
| H | 9.3291315972  | -3.1948874801 | 0.8830157943   |
| H | 9.3294790243  | -3.1948601508 | -0.8806404315  |
| H | 8.3428877238  | -4.3698143643 | 0.0009777806   |

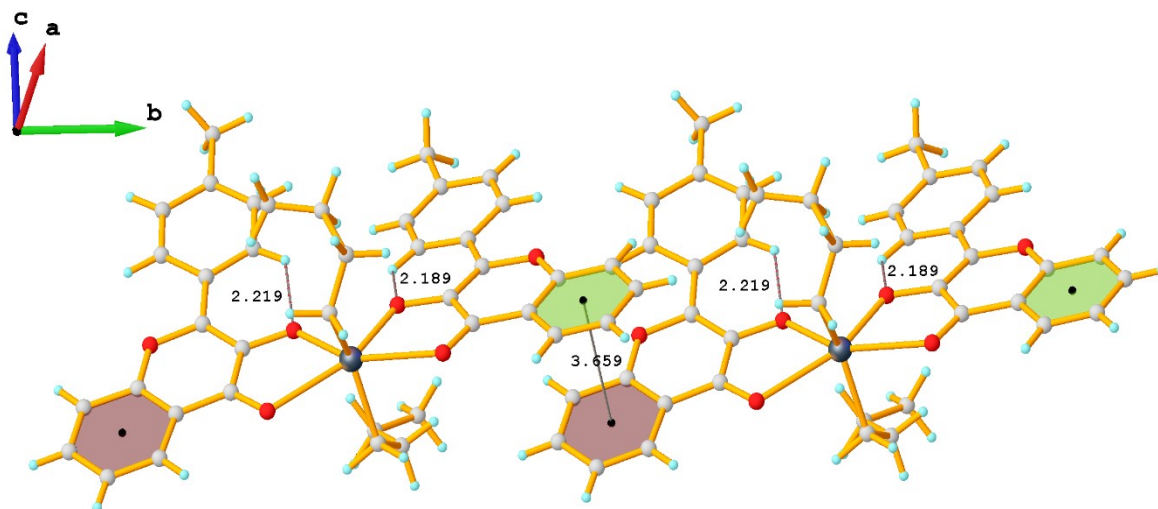

**Figure S3.** Intramolecular hydrogen bonding and  $\pi\cdots\pi$  interactions in compound **4a**.

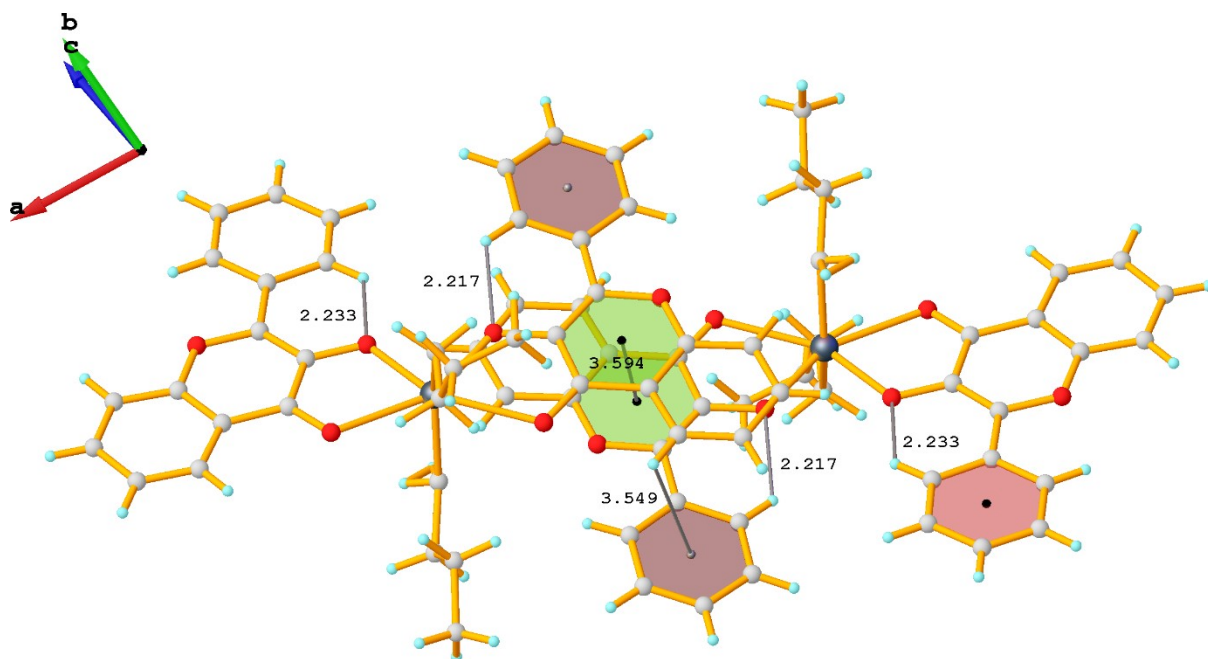

**Figure S4.** Intramolecular hydrogen bonding and non-covalent  $\pi\cdots\pi$ , and  $C-H\cdots\pi$  interactions in the compound **5a**.

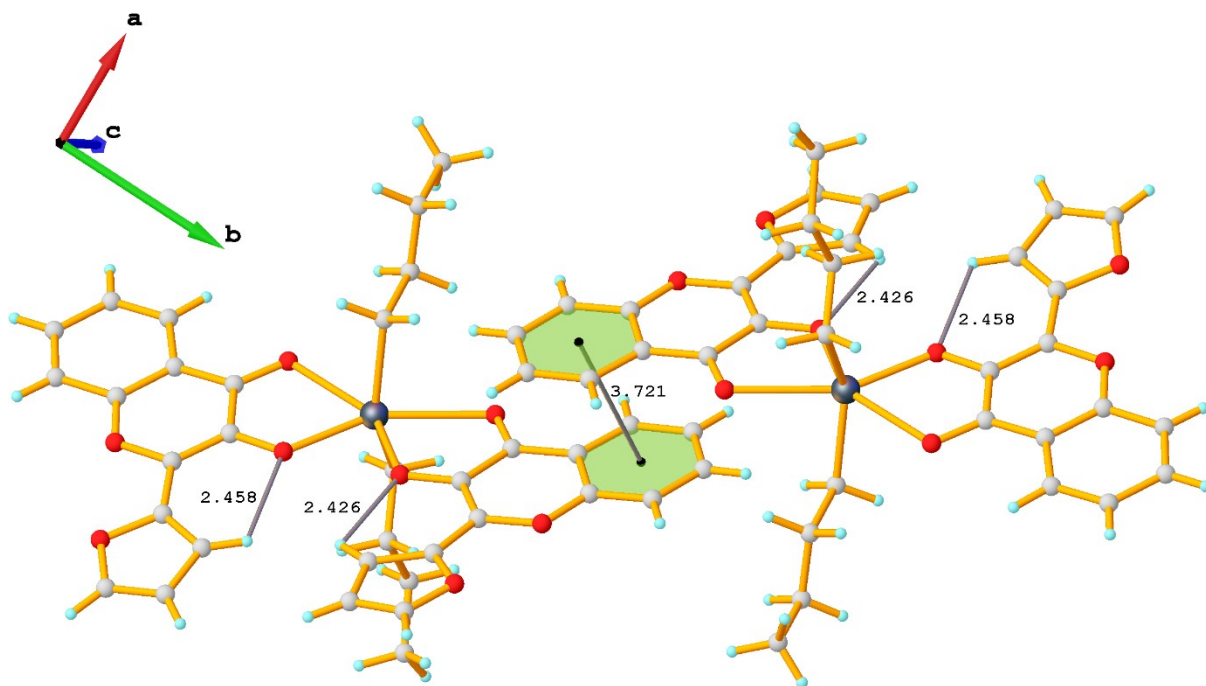

**Figure S5.** The crystalline lattice involving the Intramolecular H-bonding and  $\pi \cdots \pi$  interactions in **6a**.

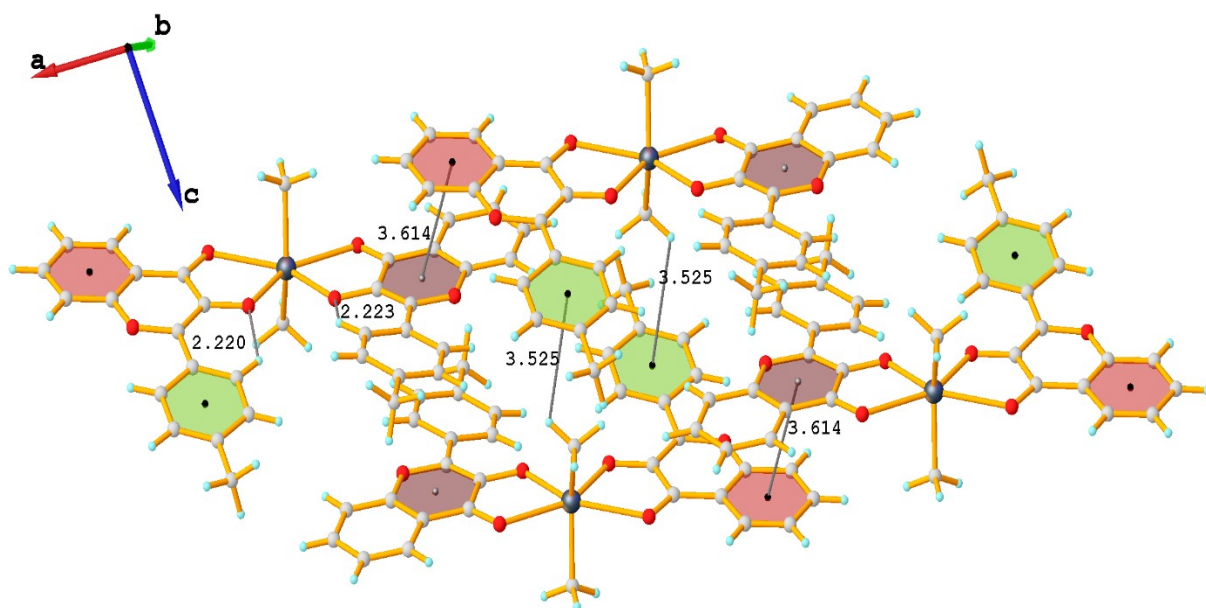

**Figure S6.** Intramolecular H-bonding, C-H $\cdots\pi$ , and  $\pi \cdots \pi$  interactions in the compound **4b**.



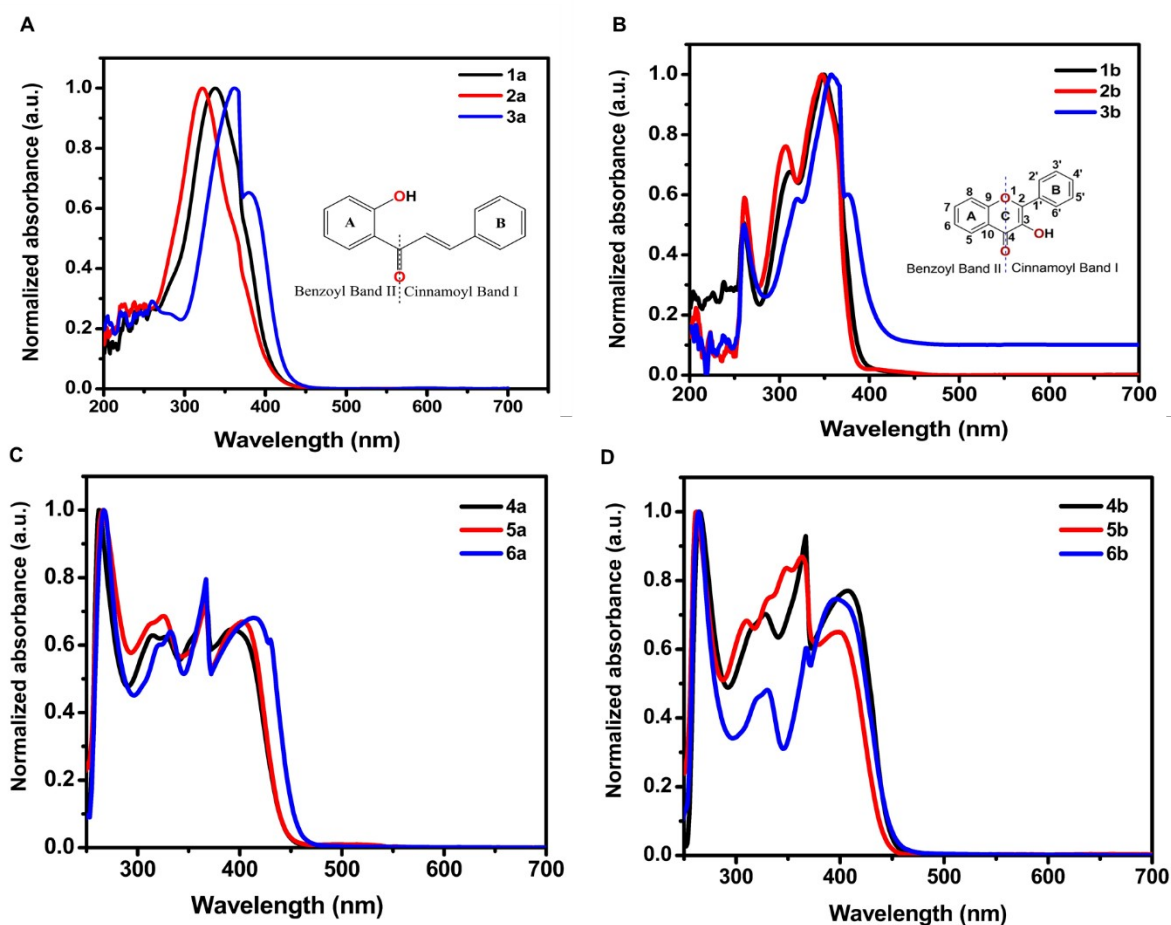

**Figure S7.** Normalized absorption spectra in MeOH of 0.12 mM (A) 2-hydroxychalcones (1a-3a), (B) 3-hydroxy-4*H*-chromen-4-ones (1b-3b), (C) organotin(IV) compounds (4a-6a) and (D) organotin(IV) compounds (4b-6b) (Inset: Divisions of bands I and II related to UV–Vis absorption of: Ring A (Band II) benzoyl system; Ring B (Band I) cinnamoyl system in chalcone and chromone structure).

**Table S3.** Calculated coordinates of **1b** with B3LYP/DGDZVP on H, C, and O.  
0,1

| atom | x             | y             | z             |
|------|---------------|---------------|---------------|
| O    | 0.5636596434  | -0.9116388651 | -0.0040913203 |
| O    | -0.1064093614 | 2.6688238516  | 0.0035366071  |
| H    | 0.6414072159  | 3.3129351298  | 0.0066347294  |
| O    | 2.5146013589  | 2.6614009571  | 0.0073570841  |
| C    | -0.1564185226 | 0.2627777142  | -0.0026270245 |
| C    | 0.5154919539  | 1.4591200246  | 0.0011068851  |
| C    | 1.9740794653  | 1.5378937705  | 0.0035047482  |
| C    | 2.6805846034  | 0.2626474186  | 0.0017776955  |
| C    | 4.0889839748  | 0.1771797519  | 0.0038367973  |
| H    | 4.6559449009  | 1.1036142131  | 0.0067532184  |
| C    | 4.7137589865  | -1.0605446544 | 0.0021390001  |
| H    | 5.798265983   | -1.1268057989 | 0.0036939469  |
| C    | 3.9382976258  | -2.2397455002 | -0.0016466534 |
| H    | 4.4294362703  | -3.2094856485 | -0.0030067769 |
| C    | 2.5504054197  | -2.1791139008 | -0.0036828217 |
| H    | 1.9391955757  | -3.0769798131 | -0.0066440219 |
| C    | 1.9260423362  | -0.9216132723 | -0.0019161802 |
| C    | -1.6067228042 | 0.0287994541  | -0.00401251   |
| C    | -2.5400406624 | 1.0874633331  | -0.0154515391 |
| H    | -2.1958474992 | 2.1129602182  | -0.024938535  |
| C    | -3.909655186  | 0.8242812852  | -0.0188034339 |
| H    | -4.6043750245 | 1.6619644797  | -0.0315223245 |
| C    | -4.4100125998 | -0.4866788091 | -0.0091560036 |
| C    | -3.4783737269 | -1.5373188712 | -0.0012130828 |
| H    | -3.831276634  | -2.5669215512 | 0.0002087156  |
| C    | -2.1072451062 | -1.2910424624 | 0.0019723023  |
| H    | -1.417124735  | -2.1271314464 | 0.0060523359  |
| C    | -5.8966256257 | -0.7583945898 | 0.0205113155  |
| H    | -6.2616395708 | -0.8227416011 | 1.0533762855  |
| H    | -6.1416438815 | -1.7047932366 | -0.4713708885 |
| H    | -6.4598423737 | 0.0381144192  | -0.4752175507 |

**Table S4.** The frontier molecular orbitals of **1b** and **4b** estimated from TD-DFT calculations.

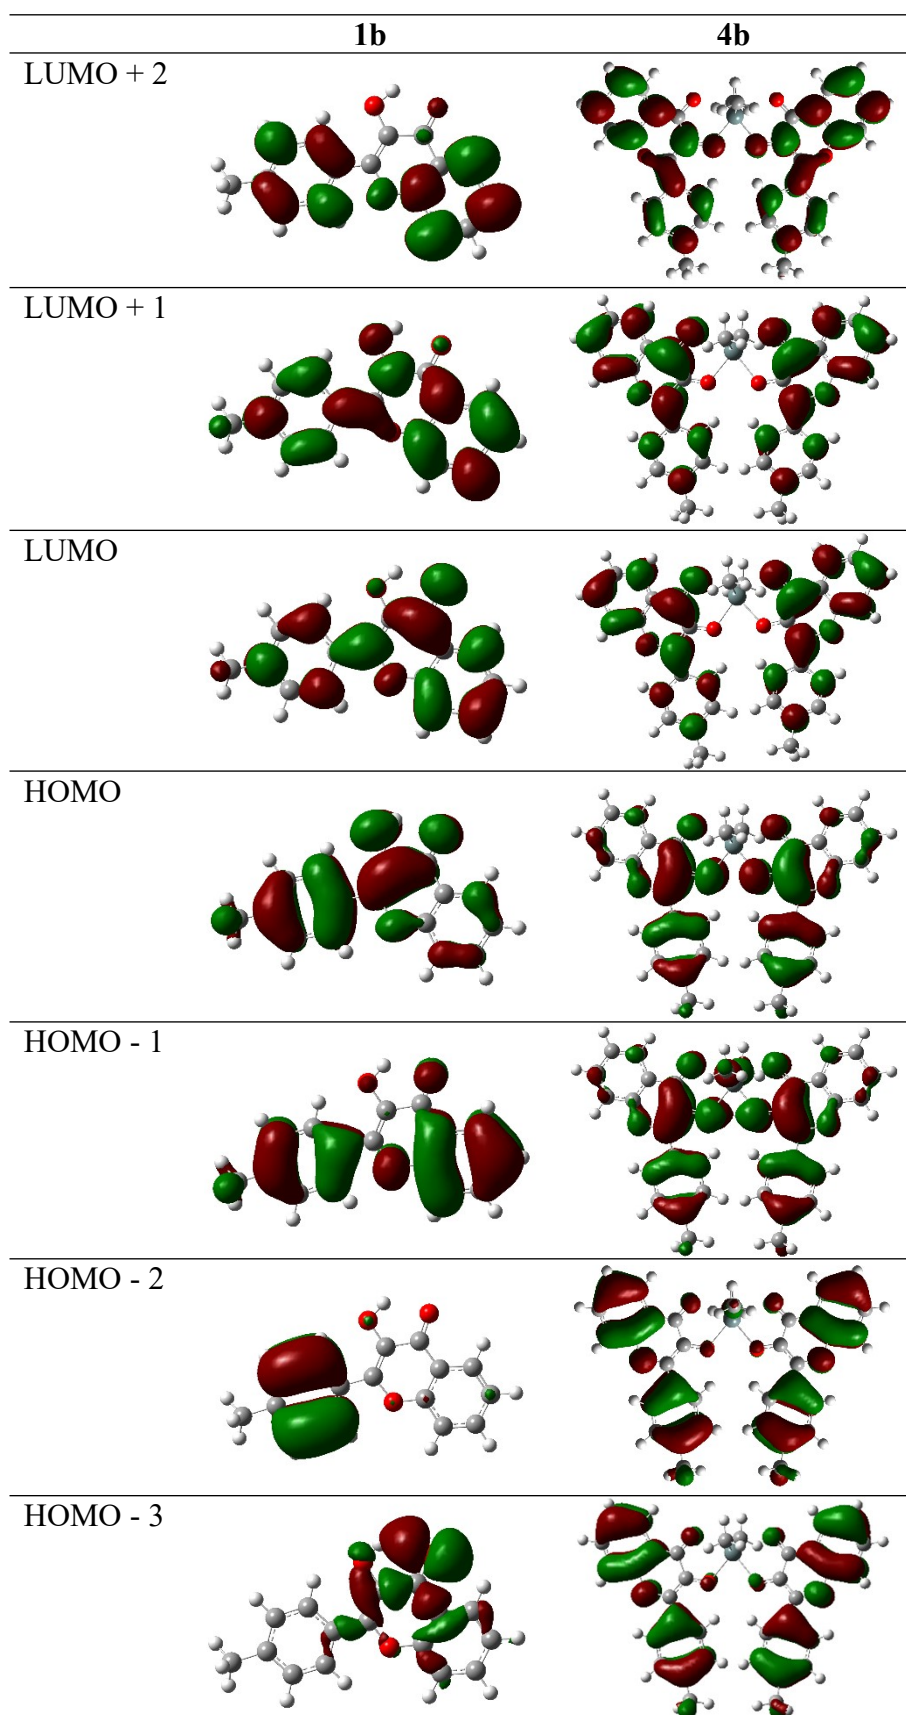

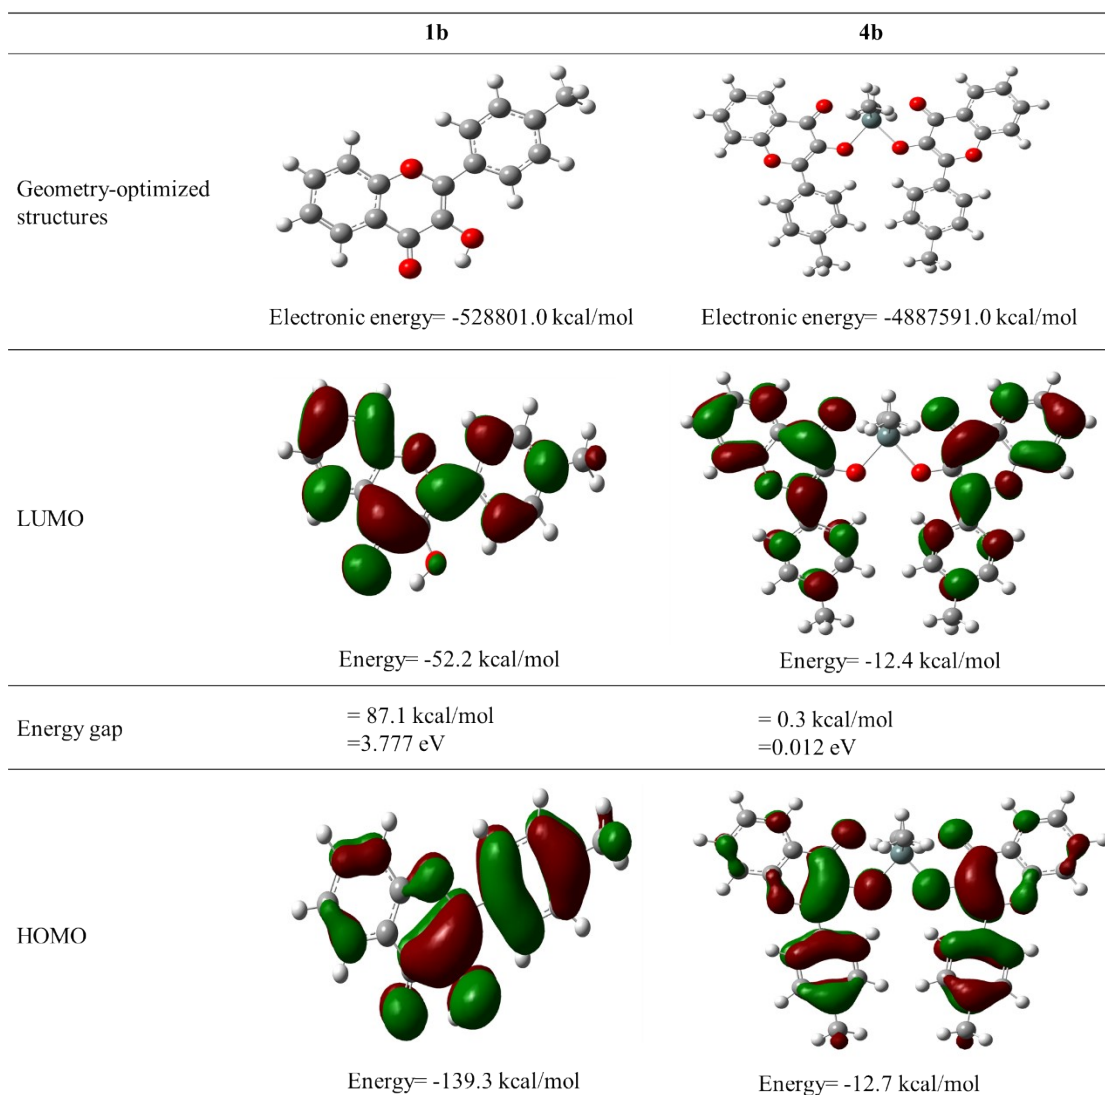

**Figure S8.** Geometry-optimized structures and HOMO-LUMO band gap for **1b** and **4b**.

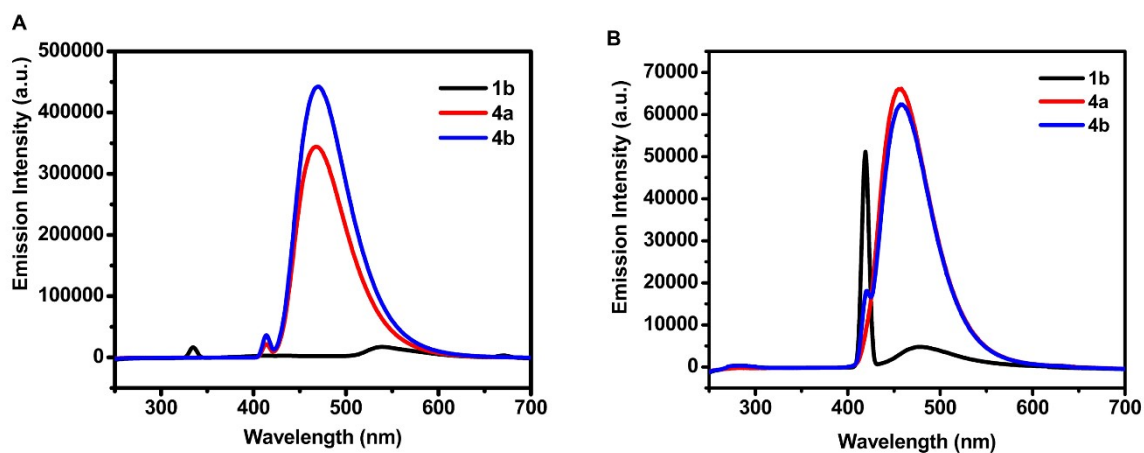

**Figure S9.** Fluorescence spectra of 18.54  $\mu\text{M}$  (A) 3-hydroxy-4*H*-chromen-4-one **1b**, organotin(IV) compounds **4a**, **4b** in DMSO and (B) in MeOH at  $\lambda_{\text{ex}} = 415$  nm.

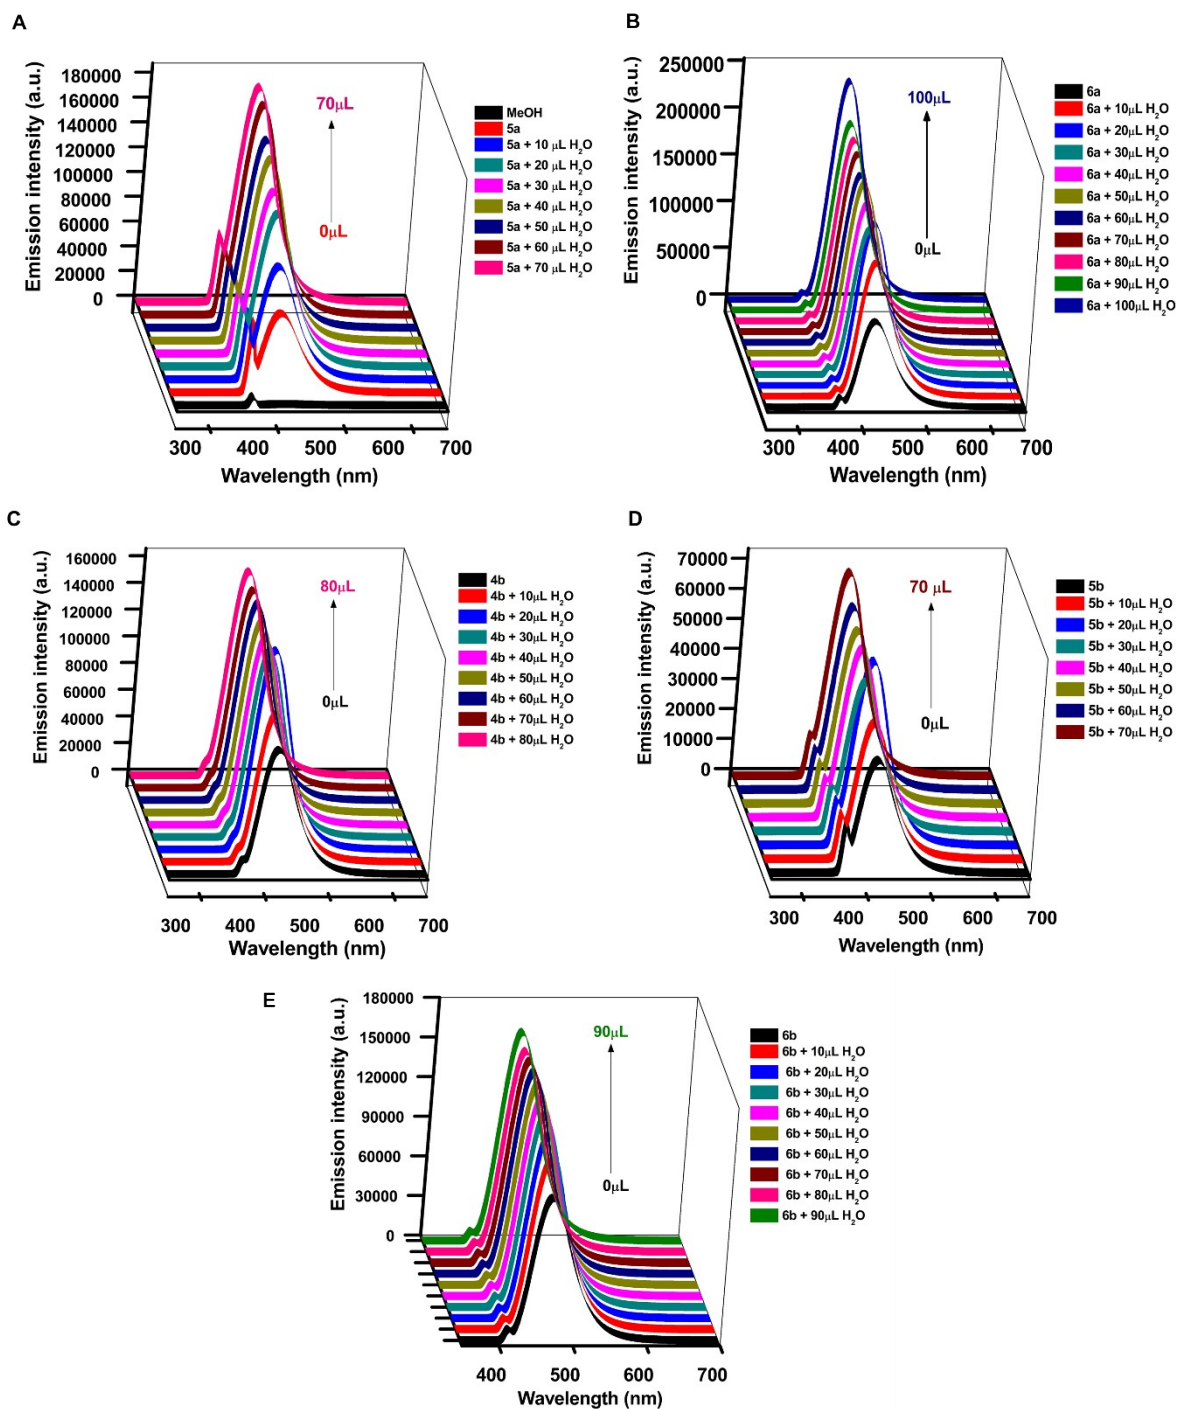

**Figure S10.** Fluorescence spectra of 18.54  $\mu\text{M}$  organotin(IV) complexes in MeOH/H<sub>2</sub>O mixtures,  $\lambda_{\text{ex}} = 415$  nm, (A) of **5a**, (B) of **6a**, (C) of **4b**, (D) of **5b**, and (E) of **6b**.

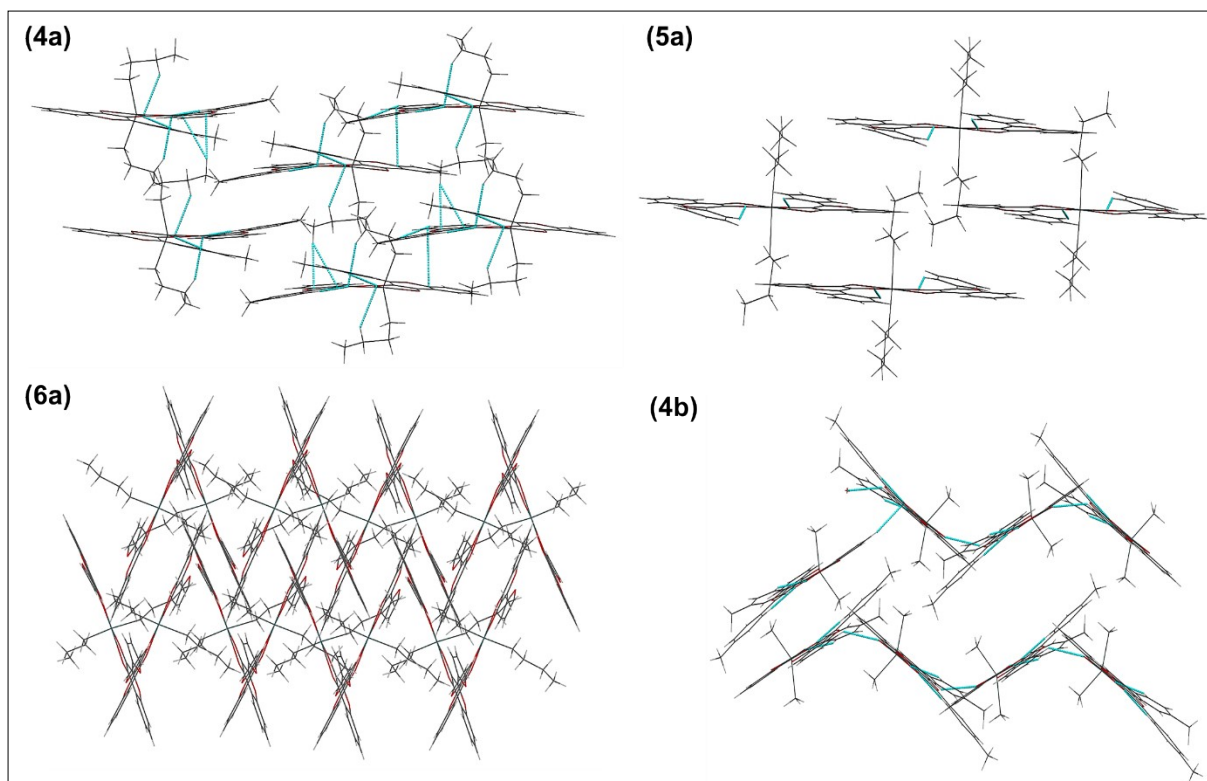

**Figure S11.** Wireframe representation (drawn with Mercury 4.2.0) of J-type stacking interactions; brickwork arrangement for **4a** and **5a**, herringbone stacking interactions in **6a** and **4b**.

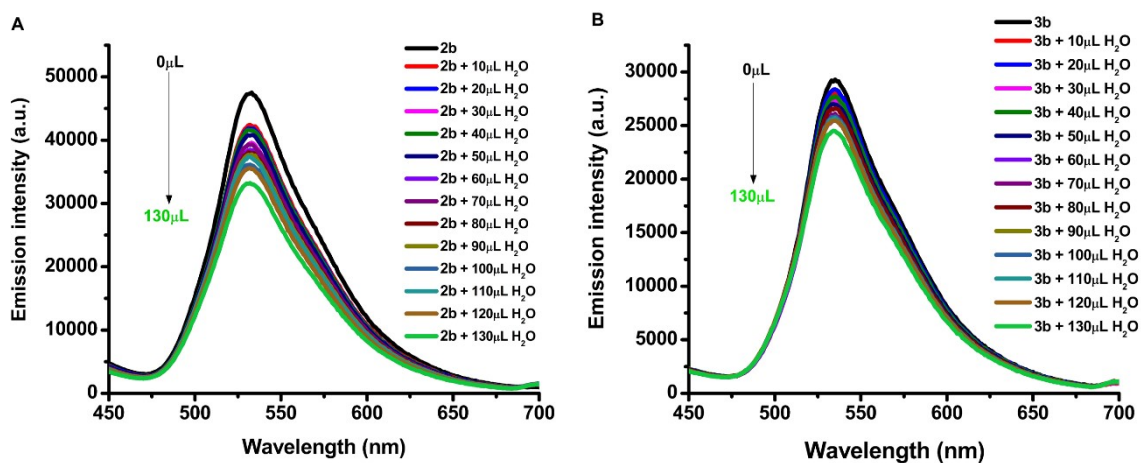

**Figure S12.** Fluorescence spectra of 18.54  $\mu\text{M}$  ligands in MeOH/ $\text{H}_2\text{O}$  mixtures,  $\lambda_{\text{ex}} = 350$  nm, (A) of **2b** and (B) of **3b**.

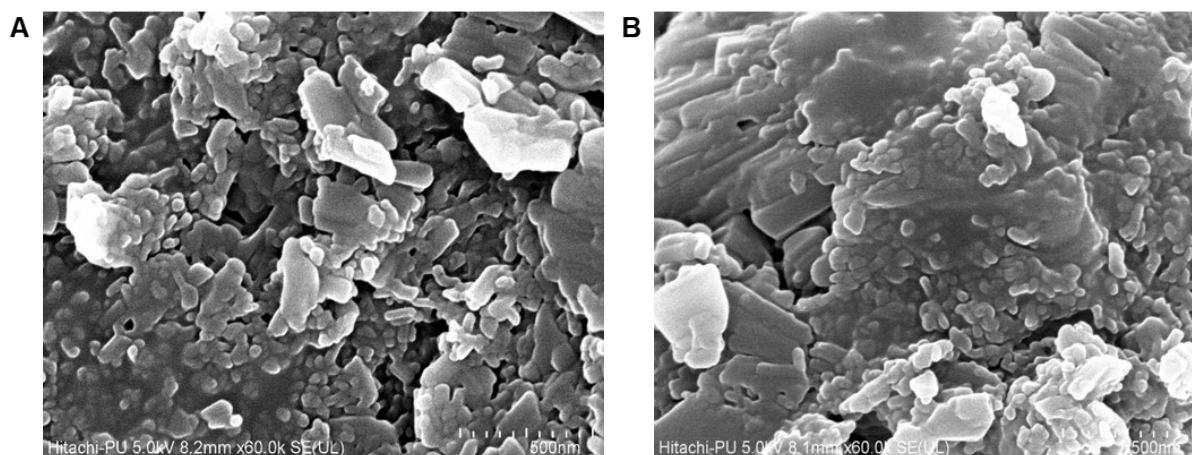

**Figure S13.** (A) and (B) FESEM images of **4a** at 4.76 % water fraction and 33.33% water fraction in MeOH, respectively.

**Table S5.** Similarities between crystallographic data and structure refinement parameters of **4a** and **4a'**.

| Parameter                                             | <b>4a</b>                                         | <b>4a'</b>                                        |
|-------------------------------------------------------|---------------------------------------------------|---------------------------------------------------|
| Empirical formula                                     | C <sub>40</sub> H <sub>40</sub> O <sub>6</sub> Sn | C <sub>40</sub> H <sub>40</sub> O <sub>6</sub> Sn |
| Formula weight                                        | 735.41                                            | 735.41                                            |
| T(K)                                                  | 293(2)                                            | 293(2)                                            |
| Crystal system                                        | triclinic                                         | triclinic                                         |
| Space group                                           | <i>P</i> -1                                       | <i>P</i> -1                                       |
| a(Å)                                                  | 8.2279(2)                                         | 8.2419(2)                                         |
| b(Å)                                                  | 12.1695(2)                                        | 12.1794(4)                                        |
| c(Å)                                                  | 18.0429(4)                                        | 18.0560(8)                                        |
| $\alpha$ (°)                                          | 85.696(2)                                         | 85.726(3)                                         |
| $\beta$ (°)                                           | 89.597(2)                                         | 89.592(3)                                         |
| $\gamma$ (°)                                          | 75.392(2)                                         | 75.354(2)                                         |
| V(Å <sup>3</sup> )                                    | 1743.16(7)                                        | 1748.59(11)                                       |
| Z                                                     | 2                                                 | 2                                                 |
| $\rho_{\text{calc}}$ (g/cm <sup>3</sup> )             | 1.401                                             | 1.397                                             |
| $\mu$ (mm <sup>-1</sup> )                             | 0.779                                             | 0.777                                             |
| F(000)                                                | 756.0                                             | 756.0                                             |
| Crystal size(mm <sup>3</sup> )                        | 0.33 × 0.24 × 0.13                                | 0.12 × 0.1 × 0.07                                 |
| Radiation                                             | MoK $\alpha$ ( $\lambda$ = 0.71073)               | MoK $\alpha$ ( $\lambda$ = 0.71073)               |
| 2 $\theta$ range                                      | 6.792 to 54.9                                     | 6.786 to 50.14                                    |
| Index ranges                                          | -10 ≤ h ≤ 10,<br>-15 ≤ k ≤ 14,<br>-23 ≤ l ≤ 22    | -9 ≤ h ≤ 9,<br>-14 ≤ k ≤ 14,<br>0 ≤ l ≤ 21        |
| Reflections collected                                 | 24253                                             | 25944                                             |
| Independent reflections                               | 7414                                              | 6185                                              |
| $\theta_{\text{max}}$ (°) and Completeness(%)         | 27.450 and<br>0.929                               | 25.070 and<br>0.994                               |
| Absorption correction                                 | Multi-scan                                        | Multi-scan                                        |
| T <sub>min</sub> and T <sub>max</sub>                 | 0.783 and 0.906                                   | 0.912 and 0.949                                   |
| Data/restraints/parameters                            | 7414/15/428                                       | 6185/36/429                                       |
| GOF on F <sup>2</sup>                                 | 1.014                                             | 1.084                                             |
| R <sub>1</sub> , wR <sub>2</sub> [I > 2 $\sigma$ (I)] | 0.0659, 0.1742                                    | 0.0781, 0.1958                                    |
| R <sub>1</sub> , wR <sub>2</sub> [all data]           | 0.0775, 0.1874                                    | 0.0978, 0.2090                                    |
| Largest diff. peak/<br>hole(e Å <sup>-3</sup> )       | 1.08/-1.42                                        | 1.35/-1.24                                        |

**Table S6.** Similarities between selected bond lengths (Å) and bond angles (°) of **4a** and **4a'**.

|                                                                   | <b>4a</b>  | <b>4a'</b> |
|-------------------------------------------------------------------|------------|------------|
| <b>Bond length (Å)</b>                                            |            |            |
| Sn-O4                                                             | 2.073(3)   | 2.077(5)   |
| Sn-O3                                                             | 2.066(3)   | 2.071(6)   |
| Sn-O2                                                             | 2.485(3)   | 2.475(7)   |
| Sn-O1                                                             | 2.437(3)   | 2.440(6)   |
| Sn-C*                                                             | 2.133(6)   | 2.135(12)  |
| Sn-C**                                                            | 2.129(6)   | 2.112(11)  |
| <b>Bond angles (°)</b>                                            |            |            |
| O4-Sn-O1                                                          | 72.23(11)  | 72.2(2)    |
| O4-Sn-O2                                                          | 150.49(12) | 150.7(2)   |
| O4-Sn-C*                                                          | 108.4(2)   | 108.1(4)   |
| O4-Sn-C**                                                         | 102.7(2)   | 102.0(4)   |
| O3-Sn-O4                                                          | 79.31(11)  | 79.6(2)    |
| O3-Sn-O1                                                          | 151.12(12) | 151.3(2)   |
| O3-Sn-O2                                                          | 71.63(12)  | 71.5(2)    |
| O3-Sn-C**                                                         | 108.3(2)   | 108.2(4)   |
| O3-Sn-C*                                                          | 101.7(2)   | 102.2(4)   |
| O1-Sn-O2                                                          | 137.12(11) | 137.0(2)   |
| C*-Sn-O2                                                          | 83.0(2)    | 82.3(5)    |
| C*-Sn-O1                                                          | 83.1(3)    | 83.2(5)    |
| C**-Sn-O2                                                         | 82.1(2)    | 83.5(4)    |
| C**-Sn-O1                                                         | 83.1(2)    | 82.4(4)    |
| C**-Sn-C*                                                         | 140.0(3)   | 140.4(5)   |
| For <b>4a</b> = C*=C33, C**=C37, For <b>4a'</b> = C*=C37, C**=C33 |            |            |

**Table S7.** Readings of the emission measurements for **4a** in the absence of analyte.

| Blank Readings (4a)             | Fluorescence Intensity |
|---------------------------------|------------------------|
| <b>1</b>                        | 533.4211               |
| <b>2</b>                        | 521.3424               |
| <b>3</b>                        | 513.9273               |
| <b>4</b>                        | 515.5544               |
| <b>5</b>                        | 511.2778               |
| <b>6</b>                        | 510.8295               |
| <b>7</b>                        | 509.4567               |
| <b>8</b>                        | 526.5432               |
| <b>9</b>                        | 596.5542               |
| <b>10</b>                       | 520.3423               |
| Standard Deviation ( $\sigma$ ) | 25.95367               |



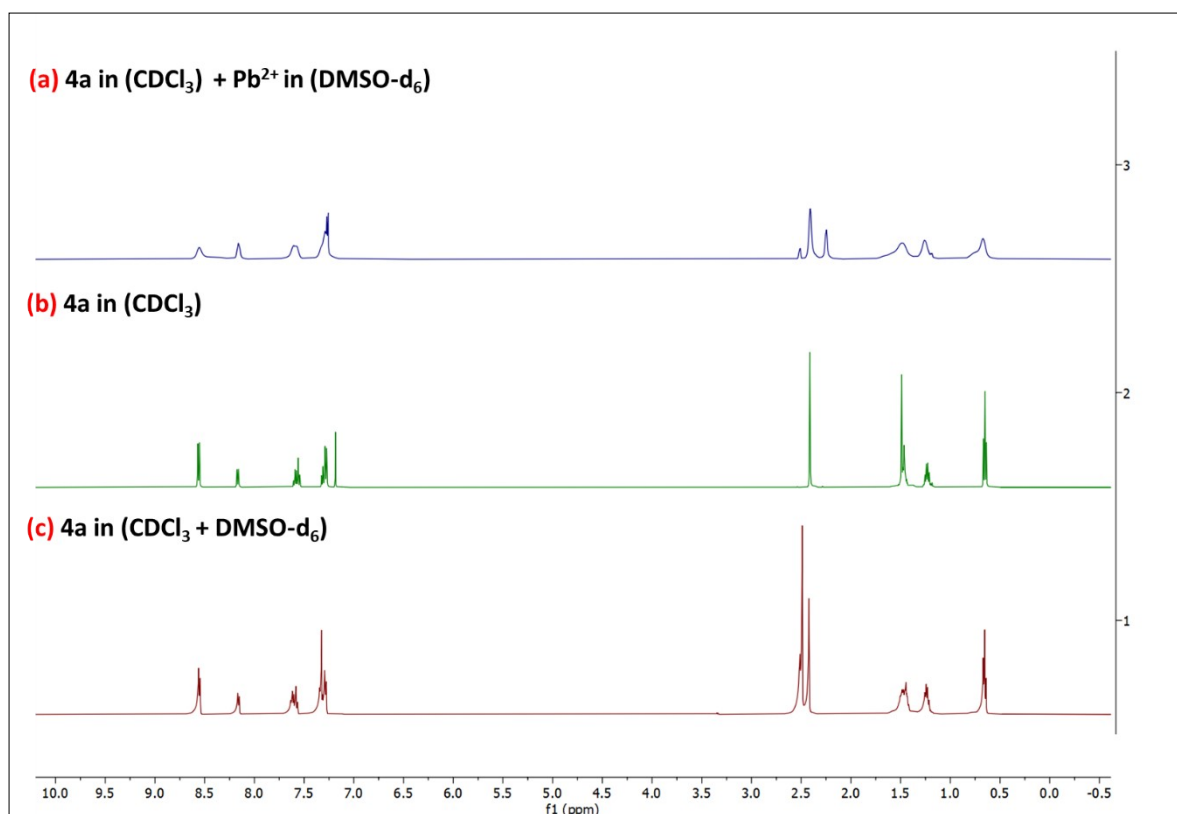

**Figure S14.**  $^1\text{H}$  NMR spectrum (a) of **4a** (in  $\text{CDCl}_3$ ) in the presence of  $10\ \mu\text{L}$  of  $\text{Pb}(\text{NO}_3)_2$  (in  $\text{DMSO-d}_6$ ), (b) of **4a** only (in  $\text{CDCl}_3$ ), and (c) of **4a** in ( $\text{CDCl}_3 + \text{DMSO-d}_6$ ) recording for comparison).

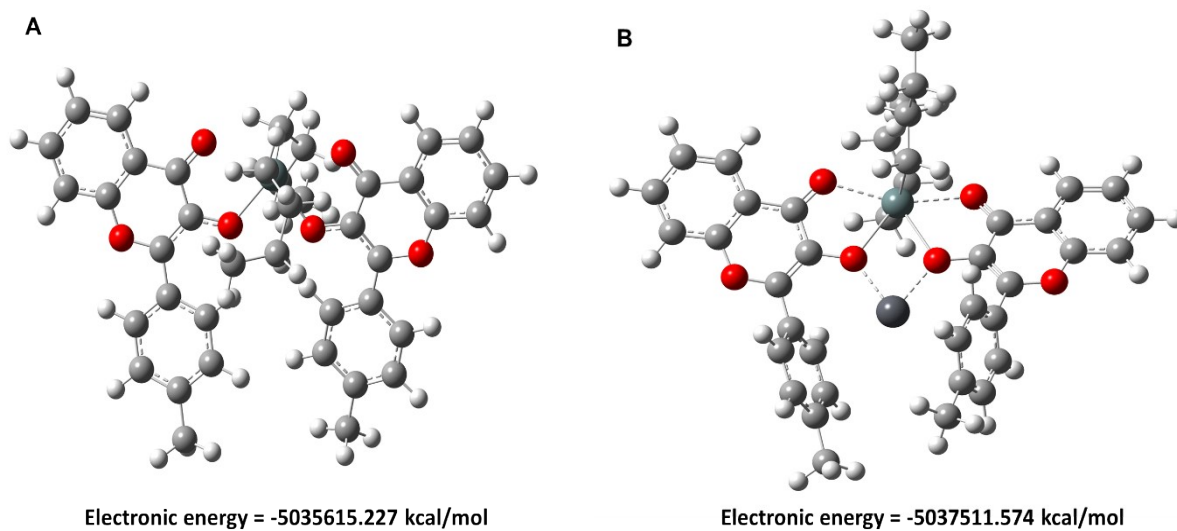

**Figure S15.** (A) Geometry-optimized (B3LYP/DGDZVP) structure of compound **4a** (B) Geometry-optimized (GenECP: Lanl2DZ for Pb and DGDZVP for Sn, H, C, O) structure of compound **4a+Pb<sup>2+</sup>**.

**Table S8.** Calculated coordinates of **4a** with B3LYP/DGDZVP on Sn, H, C, and O.  
0,1

| atom | x         | y         | z         |
|------|-----------|-----------|-----------|
| Sn   | -0.019292 | -1.81737  | 0.010214  |
| O    | -1.395913 | -0.173853 | -0.037226 |
| O    | 1.329061  | -0.148928 | 0.005696  |
| O    | .905974   | 0.473752  | -0.072358 |
| O    | -4.983384 | 0.381398  | 0.058631  |
| O    | 2.30135   | -2.649868 | -0.151594 |
| O    | -2.321678 | -2.692887 | 0.197423  |
| C    | -2.704103 | -0.38065  | 0.026267  |
| C    | 3.553459  | 0.719204  | 0.017792  |
| C    | 2.641828  | -0.329936 | -0.04001  |
| C    | -3.636807 | 0.648321  | -0.055801 |
| C    | -4.594163 | -1.982965 | 0.287665  |
| C    | -3.166945 | -1.754951 | 0.17302   |
| C    | 3.1314    | -1.698493 | -0.141153 |
| C    | -5.45659  | -0.87609  | 0.231815  |
| C    | 3.268872  | 2.148345  | 0.18204   |
| C    | 4.563665  | -1.903978 | -0.231147 |
| C    | 5.404536  | -0.779666 | -0.199094 |
| C    | -3.381448 | 2.076333  | -0.270862 |
| C    | -7.370541 | -2.305151 | 0.512778  |
| H    | -8.446278 | -2.434732 | 0.600142  |
| C    | -6.848824 | -1.030187 | 0.343881  |
| H    | -7.486693 | -0.152442 | 0.294287  |
| C    | -5.149284 | -3.272336 | 0.458918  |
| H    | -4.471293 | -4.119495 | 0.500398  |
| C    | 5.144632  | -3.187218 | -0.35573  |
| H    | 4.483038  | -4.047894 | -0.379966 |
| C    | -6.520346 | -3.432678 | 0.570754  |
| H    | -6.946486 | -4.423421 | 0.70322   |
| C    | 6.800709  | -0.91079  | -0.288687 |
| H    | 7.421537  | -0.020036 | -0.258655 |
| C    | 0.129137  | -2.574606 | 2.053901  |
| H    | -0.889221 | -2.809962 | 2.377438  |
| H    | 0.671048  | -3.521997 | 1.958478  |
| C    | -0.142082 | -2.652212 | -2.003598 |
| H    | 0.165149  | -3.69775  | -1.885977 |
| H    | -1.204245 | -2.662883 | -2.262211 |
| C    | 7.348095  | -2.1803   | -0.411228 |
| H    | 8.427101  | -2.292148 | -0.480936 |
| C    | 6.51979   | -3.324957 | -0.445123 |
| H    | 6.965965  | -4.311019 | -0.541628 |
| C    | 0.033198  | -0.395806 | 3.430966  |
| H    | -0.950758 | -0.695414 | 3.817789  |

|   |           |           |           |
|---|-----------|-----------|-----------|
| H | -0.160312 | 0.190383  | 2.524717  |
| C | 1.975736  | 2.627718  | 0.482197  |
| H | 1.155405  | 1.927423  | 0.569051  |
| C | 0.32227   | -0.530954 | -3.446683 |
| H | 0.43472   | 0.103398  | -2.559157 |
| H | 1.04618   | -0.156519 | -4.182625 |
| C | -2.959497 | 4.85453   | -0.757774 |
| C | 4.313856  | 3.095161  | 0.075629  |
| H | 5.320248  | 2.761388  | -0.151172 |
| C | -2.103671 | 2.568397  | -0.613237 |
| H | -1.272979 | 1.879883  | -0.695572 |
| C | 1.753518  | 3.992155  | 0.676854  |
| H | 0.74852   | 4.326422  | 0.926112  |
| C | 2.787867  | 4.932575  | 0.568821  |
| C | 0.704624  | -1.98051  | -3.097232 |
| H | 0.62772   | -2.58935  | -4.011347 |
| H | 1.761637  | -2.010281 | -2.80904  |
| C | -4.441143 | 3.007502  | -0.173668 |
| H | -5.436574 | 2.663556  | 0.084227  |
| C | 0.831282  | -1.656312 | 3.067335  |
| H | 1.821308  | -1.36345  | 2.69583   |
| H | 1.016086  | -2.231013 | 3.98754   |
| C | -1.093489 | -0.367023 | -4.01728  |
| H | -1.278355 | 0.671721  | -4.312826 |
| H | -1.862295 | -0.635616 | -3.285467 |
| H | -1.240307 | -0.996964 | -4.903766 |
| C | -2.736883 | 6.330677  | -0.997078 |
| H | -3.54915  | 6.767379  | -1.587885 |
| H | -1.797533 | 6.513543  | -1.527006 |
| H | -2.694683 | 6.881601  | -0.048973 |
| C | -4.228923 | 4.362765  | -0.408289 |
| H | -5.066918 | 5.052767  | -0.324528 |
| C | -1.910478 | 3.929343  | -0.85683  |
| H | -0.917127 | 4.273026  | -1.138149 |
| C | 0.74163   | 0.485082  | 4.468082  |
| H | 0.142527  | 1.368583  | 4.715639  |
| H | 1.710153  | 0.836778  | 4.093657  |
| H | 0.92521   | -0.064016 | 5.399803  |
| C | 4.072872  | 4.453075  | 0.261306  |
| H | 4.900032  | 5.155311  | 0.171681  |
| C | 2.534948  | 6.411361  | 0.755846  |
| H | 1.573186  | 6.594848  | 1.243577  |
| H | 2.522294  | 6.934112  | -0.208863 |
| H | 3.317223  | 6.877209  | 1.364703  |

**Table S9.** Calculated coordinates of **4a+Pb<sup>2+</sup>** with GenECP: Lan12DZ for Pb and DGDZVP for Sn, H, C, and O.

2,1

| atom | x             | y             | z             |
|------|---------------|---------------|---------------|
| Sn   | -0.361890421  | -1.9681214993 | -0.1847891161 |
| O    | 1.1978542656  | -0.2375111055 | -0.0501817661 |
| O    | 4.8404512592  | -0.1333712881 | -0.0121867891 |
| O    | -1.2856316214 | 0.1798773436  | -0.0618316263 |
| O    | -4.701490082  | 21.4450967638 | 0.0304904552  |
| O    | 1.780554941   | -2.8306571599 | 0.2763183582  |
| O    | -2.6688731833 | -2.0334264954 | -0.6761502947 |
| C    | -2.731088892  | 2.6371959287  | 0.6490375465  |
| C    | 2.5140936885  | -0.6189198388 | 0.0003797053  |
| C    | 3.3813653083  | 1.6890093665  | -0.4870365792 |
| C    | -2.6534708671 | 0.247422232   | -0.1185859868 |
| C    | 5.1464227092  | -1.4447307883 | 0.2572585626  |
| C    | 3.5551336005  | 0.2569724501  | -0.1546687832 |
| C    | 2.7591972037  | -2.0282378841 | 0.2215356595  |
| C    | 4.1396090487  | -2.4276246565 | 0.3660850565  |
| C    | -3.359231823  | 1.3849546088  | 0.1663526452  |
| C    | -5.4116792696 | 0.3404684506  | -0.3710969076 |
| C    | -3.3370662206 | -0.973537138  | -0.4922163247 |
| C    | -4.7727356907 | -0.8912638032 | -0.6286597356 |
| C    | 6.5018345548  | -1.7611489598 | 0.3984893441  |
| H    | 7.2500581357  | -0.9802488372 | 0.3023582669  |
| C    | -5.5644148039 | -1.9974041874 | -1.0199156209 |
| H    | -5.0733177773 | -2.9449522412 | -1.2175666658 |
| C    | 3.0240345855  | 4.4279888036  | -1.1581562344 |
| C    | -2.6750211753 | 3.7861728151  | -0.1586206458 |
| H    | -3.1229066387 | 3.7757723145  | -1.1494422586 |
| C    | -6.7970648605 | 0.4910021603  | -0.4947396893 |
| H    | -7.255160608  | 1.4524431863  | -0.2833913878 |
| C    | -2.1675588741 | 2.6845750235  | 1.9409108026  |
| H    | -2.2472389288 | 1.8213695903  | 2.5984959101  |
| C    | 4.5220417983  | -3.7657622057 | 0.6234094485  |
| H    | 3.7473510537  | -4.5213943553 | 0.7073256164  |
| C    | 3.7785362168  | 2.7006198182  | 0.4037581618  |
| H    | 4.2427177034  | 2.437979603   | 1.3512473193  |
| C    | 6.8487207727  | -3.0820963502 | 0.6535635892  |
| H    | 7.8969974567  | -3.3445220146 | 0.7646449217  |
| C    | 2.8072718774  | 2.0564531291  | -1.7222785887 |
| H    | 2.5504657764  | 1.2887791932  | -2.4494176778 |
| C    | 5.8607616789  | -4.0861975281 | 0.7662012442  |
| H    | 6.1578029395  | -5.11161574   | 0.9646034744  |
| C    | -1.4995174876 | 5.0147812297  | 1.602794402   |
| C    | 2.6320619869  | 3.4064377644  | -2.0465917583 |
| H    | 2.223352838   | 3.6699542466  | -3.0197428772 |

|    |               |               |               |
|----|---------------|---------------|---------------|
| C  | 3.5929754798  | 4.047203624   | 0.0696391239  |
| H  | 3.9189753872  | 4.8140052139  | 0.7684691589  |
| C  | -6.9352210452 | -1.8559522376 | -1.1460475432 |
| H  | -7.5453005693 | -2.7023014651 | -1.4470005225 |
| C  | -2.0610987367 | 4.9519529974  | 0.3154477114  |
| H  | -2.0422466444 | 5.8343307386  | -0.3199181193 |
| C  | -0.0515105474 | -2.3436179263 | -2.3039639087 |
| H  | -0.425337702  | -1.4512503174 | -2.8185143542 |
| H  | 1.0334965432  | -2.3890622466 | -2.4403192362 |
| C  | -1.5608797675 | 3.8575509171  | 2.4046240702  |
| H  | -1.1639456522 | 3.8851153528  | 3.4170928576  |
| C  | -0.8437097004 | -2.5312469364 | 1.8535946193  |
| H  | -0.0173721937 | -2.1604227835 | 2.4695353284  |
| H  | -1.7499962336 | -1.9784709052 | 2.1221423904  |
| C  | -7.5492290244 | -0.61057242   | -0.8832112837 |
| H  | -8.626320367  | -0.5105297556 | -0.9829740491 |
| C  | -0.9107231313 | 6.2982298964  | 2.13519232    |
| H  | -0.507124076  | 6.9224828397  | 1.3337265551  |
| H  | -0.1186614887 | 6.1103042945  | 2.8650457786  |
| H  | -1.6868614975 | 6.8831240274  | 2.6425971932  |
| C  | 2.9003170796  | 5.8819879016  | -1.5425223881 |
| H  | 3.8093047247  | 6.2107477121  | -2.0598935962 |
| H  | 2.7769807993  | 6.5237312471  | -0.6662291126 |
| H  | 2.0615233207  | 6.0530736035  | -2.2226459645 |
| C  | -1.0396721204 | -4.0450297198 | 2.0539015996  |
| H  | -0.1344258472 | -4.5836419171 | 1.7490410482  |
| H  | -1.8535954677 | -4.40732234   | 1.4135338782  |
| C  | -1.3625843075 | -4.3940096293 | 3.518378683   |
| H  | -2.2668703321 | -3.8537589323 | 3.8277030776  |
| H  | -0.5502971544 | -4.0324371775 | 4.1623269293  |
| C  | -1.5626046449 | -5.8988745342 | 3.7392343777  |
| H  | -1.7890014859 | -6.1125993108 | 4.7881206754  |
| H  | -2.3918126008 | -6.2845584385 | 3.1358247384  |
| H  | -0.6631769021 | -6.4647151415 | 3.472170802   |
| C  | -0.7366956983 | -3.6141919013 | -2.830624745  |
| H  | -1.8241585131 | -3.4910441039 | -2.7907518505 |
| H  | -0.4764667764 | -3.7119348716 | -3.8931878836 |
| C  | -0.3343706942 | -4.9005344465 | -2.0971536713 |
| H  | 0.7590661601  | -4.9960689671 | -2.0956604022 |
| H  | -0.6340789766 | -4.8264298944 | -1.0377432425 |
| C  | -0.9633976142 | -6.1619645579 | -2.700650464  |
| H  | -0.648778853  | -6.2995640247 | -3.7405817398 |
| H  | -0.6673178971 | -7.0560194083 | -2.1439274273 |
| H  | -2.0574597994 | -6.1071928236 | -2.6878373054 |
| Pb | 0.2528333933  | 1.7660878221  | 0.1011777176  |

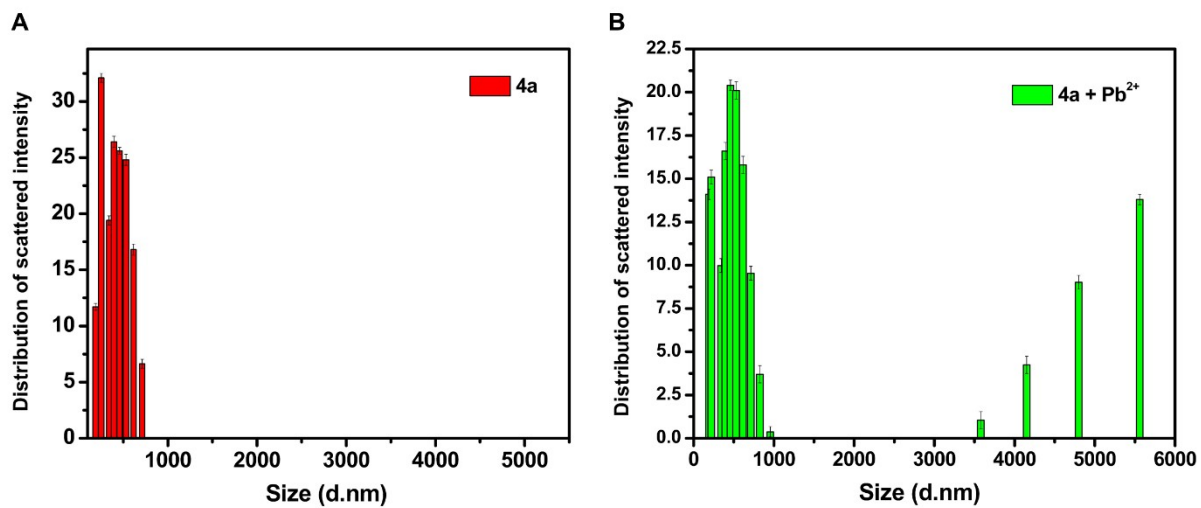

**Figure S16.** Distribution of intensity of scattered light for 0.2 mM **4a** (in Triton X-100) in the (A) absence and (B) presence of 50  $\mu\text{L}$  of 10 mM  $\text{Pb}(\text{NO}_3)_2$ .

## 2. Spectral data

### 2.1. FT-IR spectra of compounds

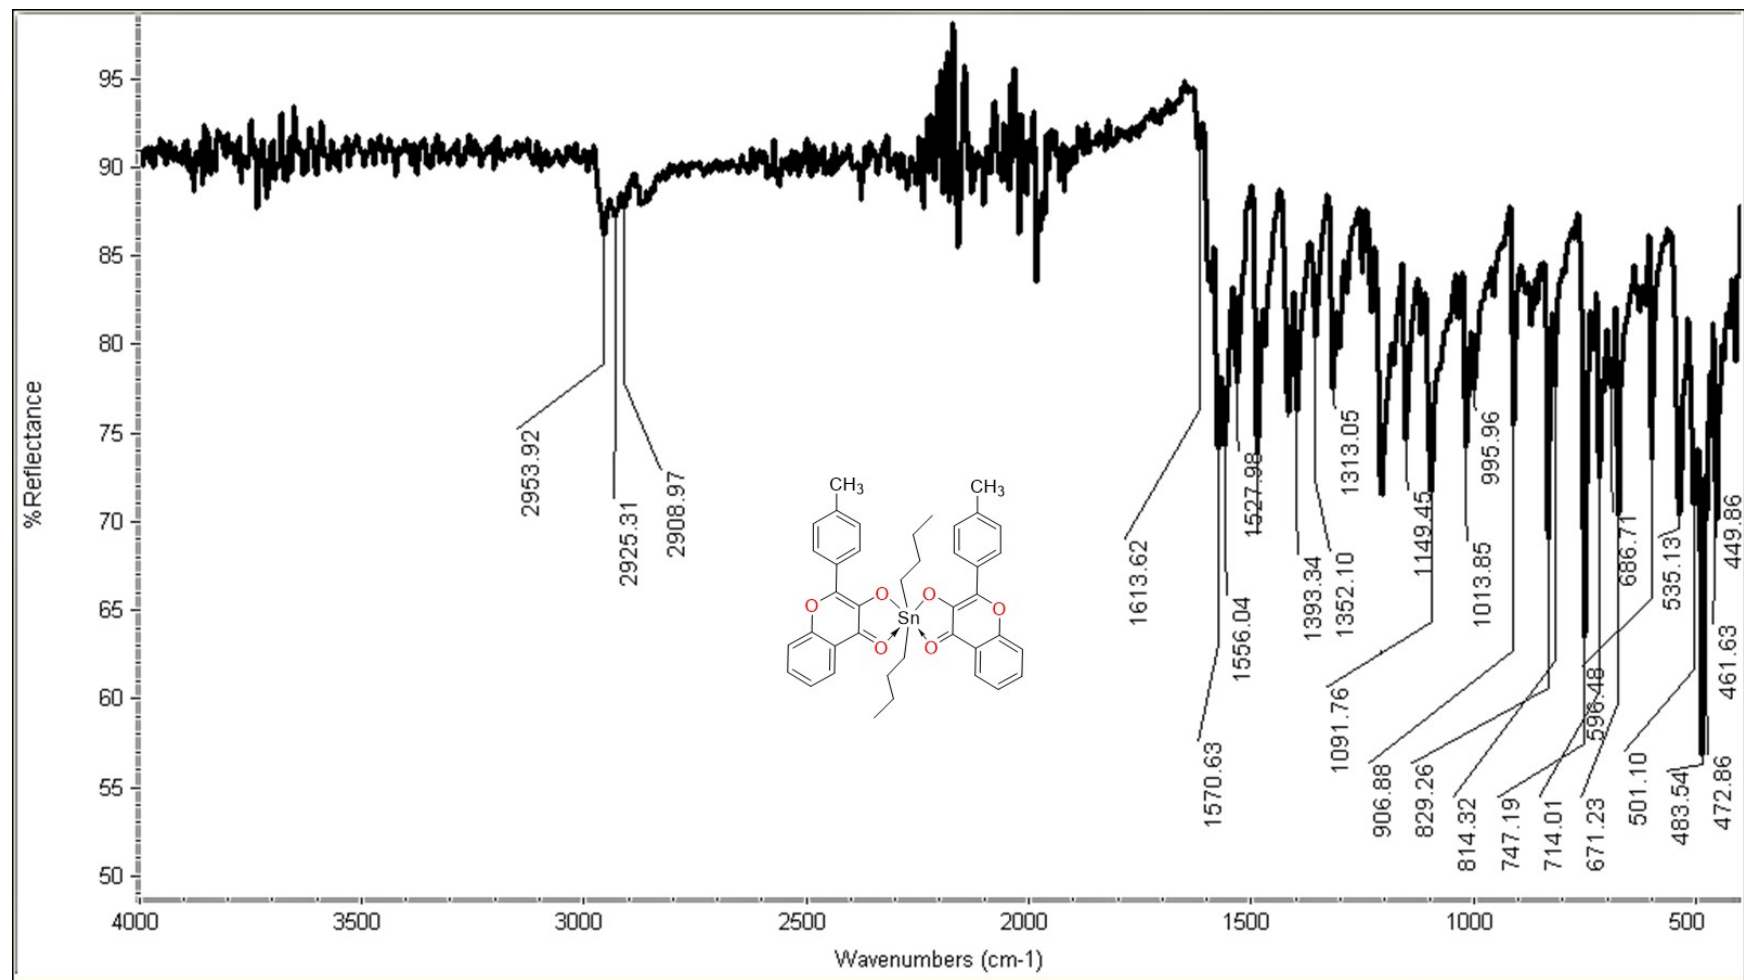

Figure S17. FT-IR spectrum of compound 4a.

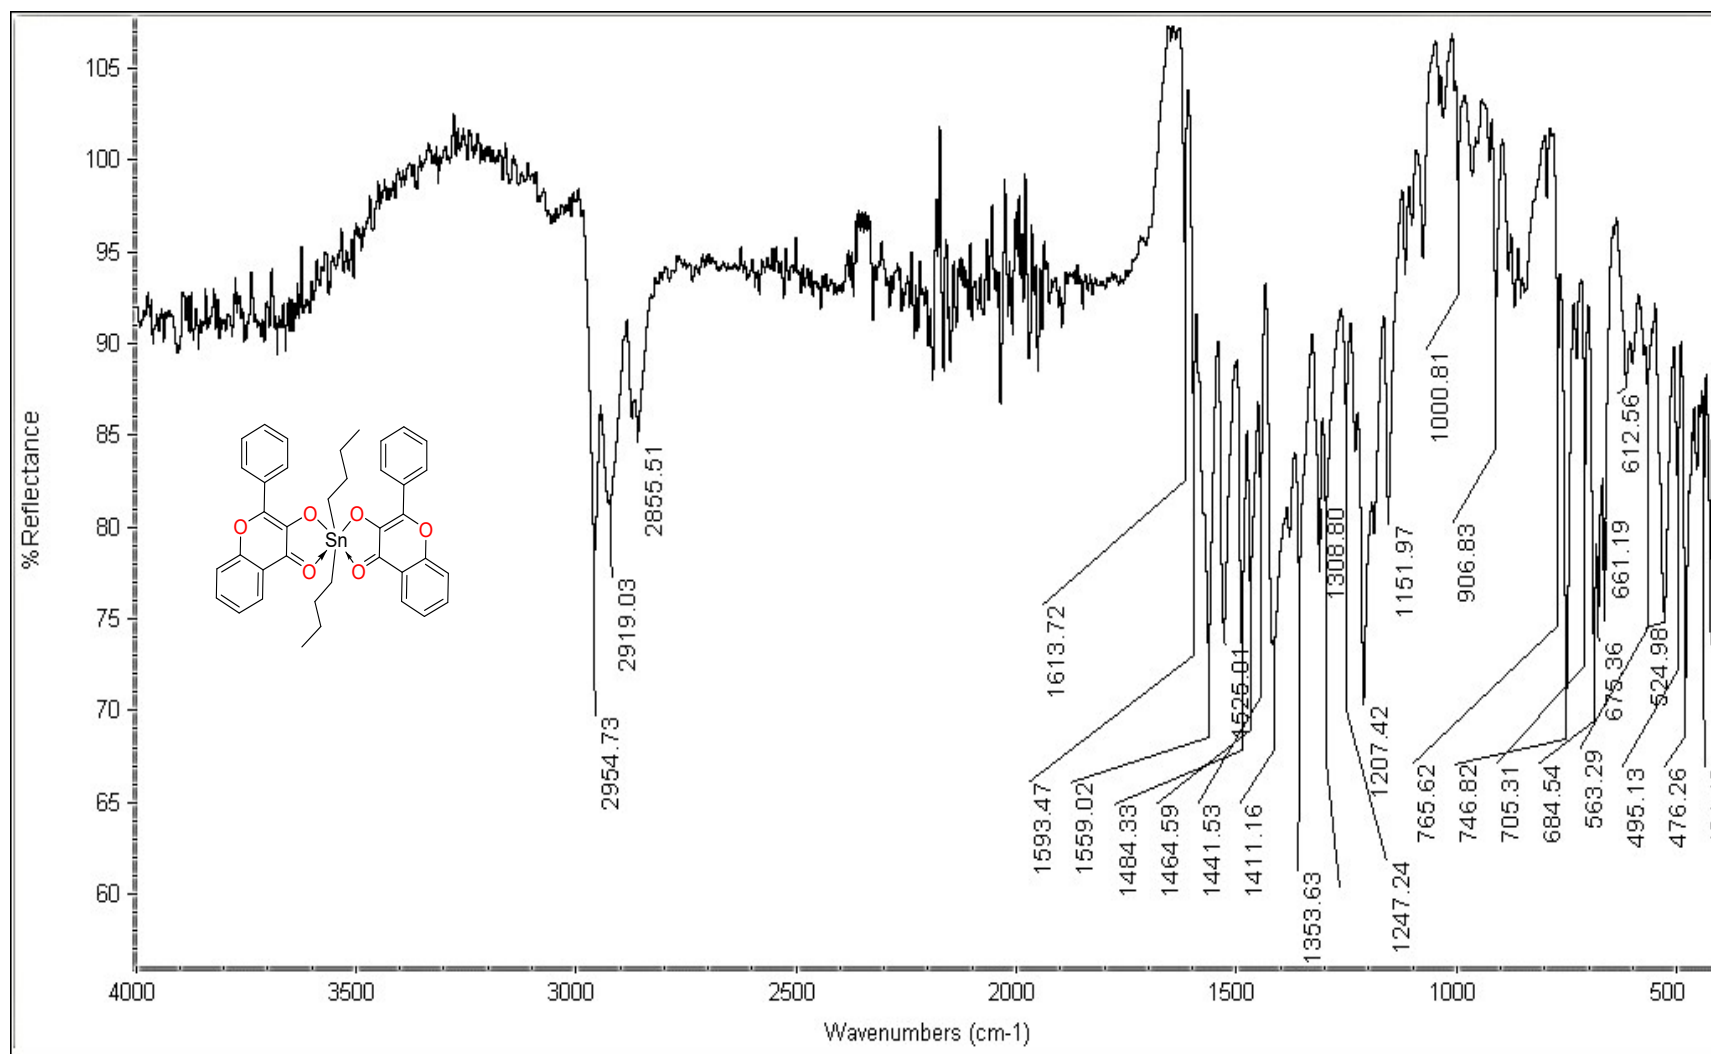

**Figure S18.** FT-IR spectrum of compound **5a**.



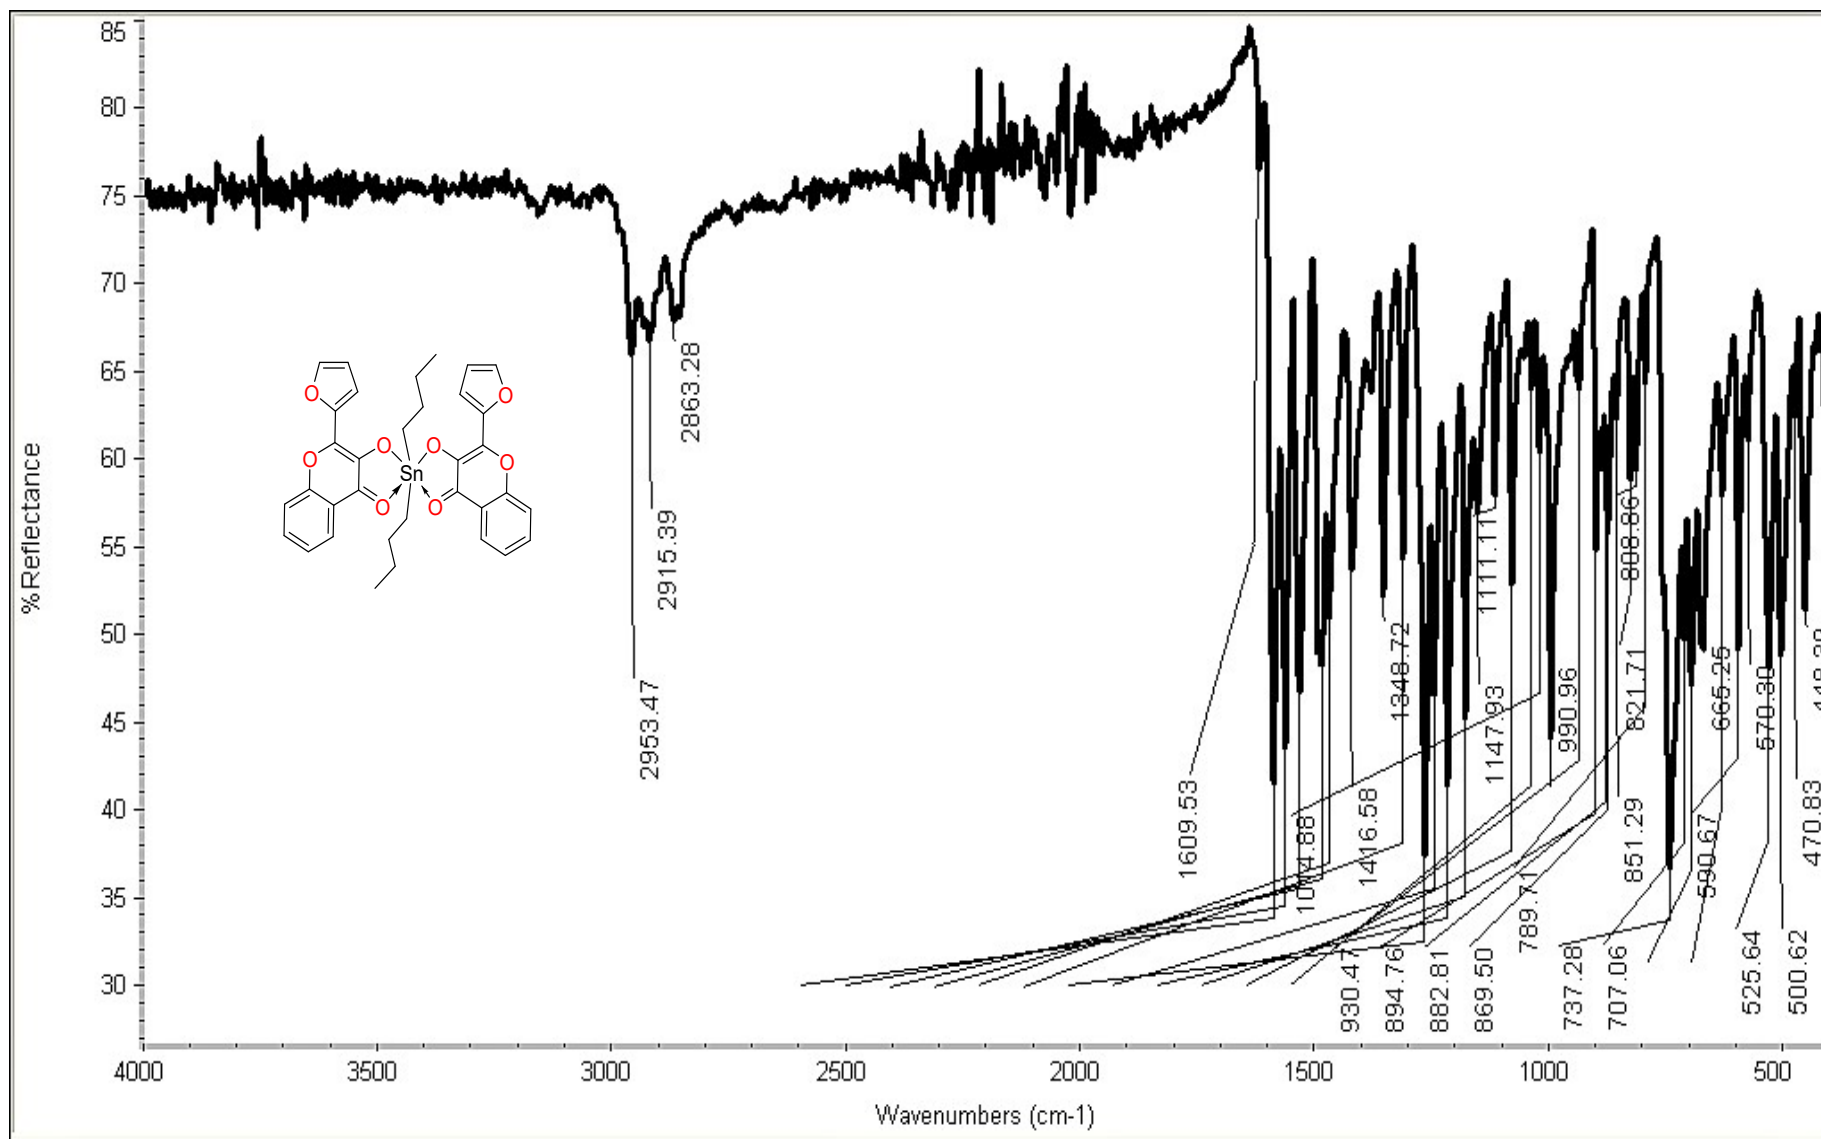

Figure S19. FT-IR spectrum of compound 6a.

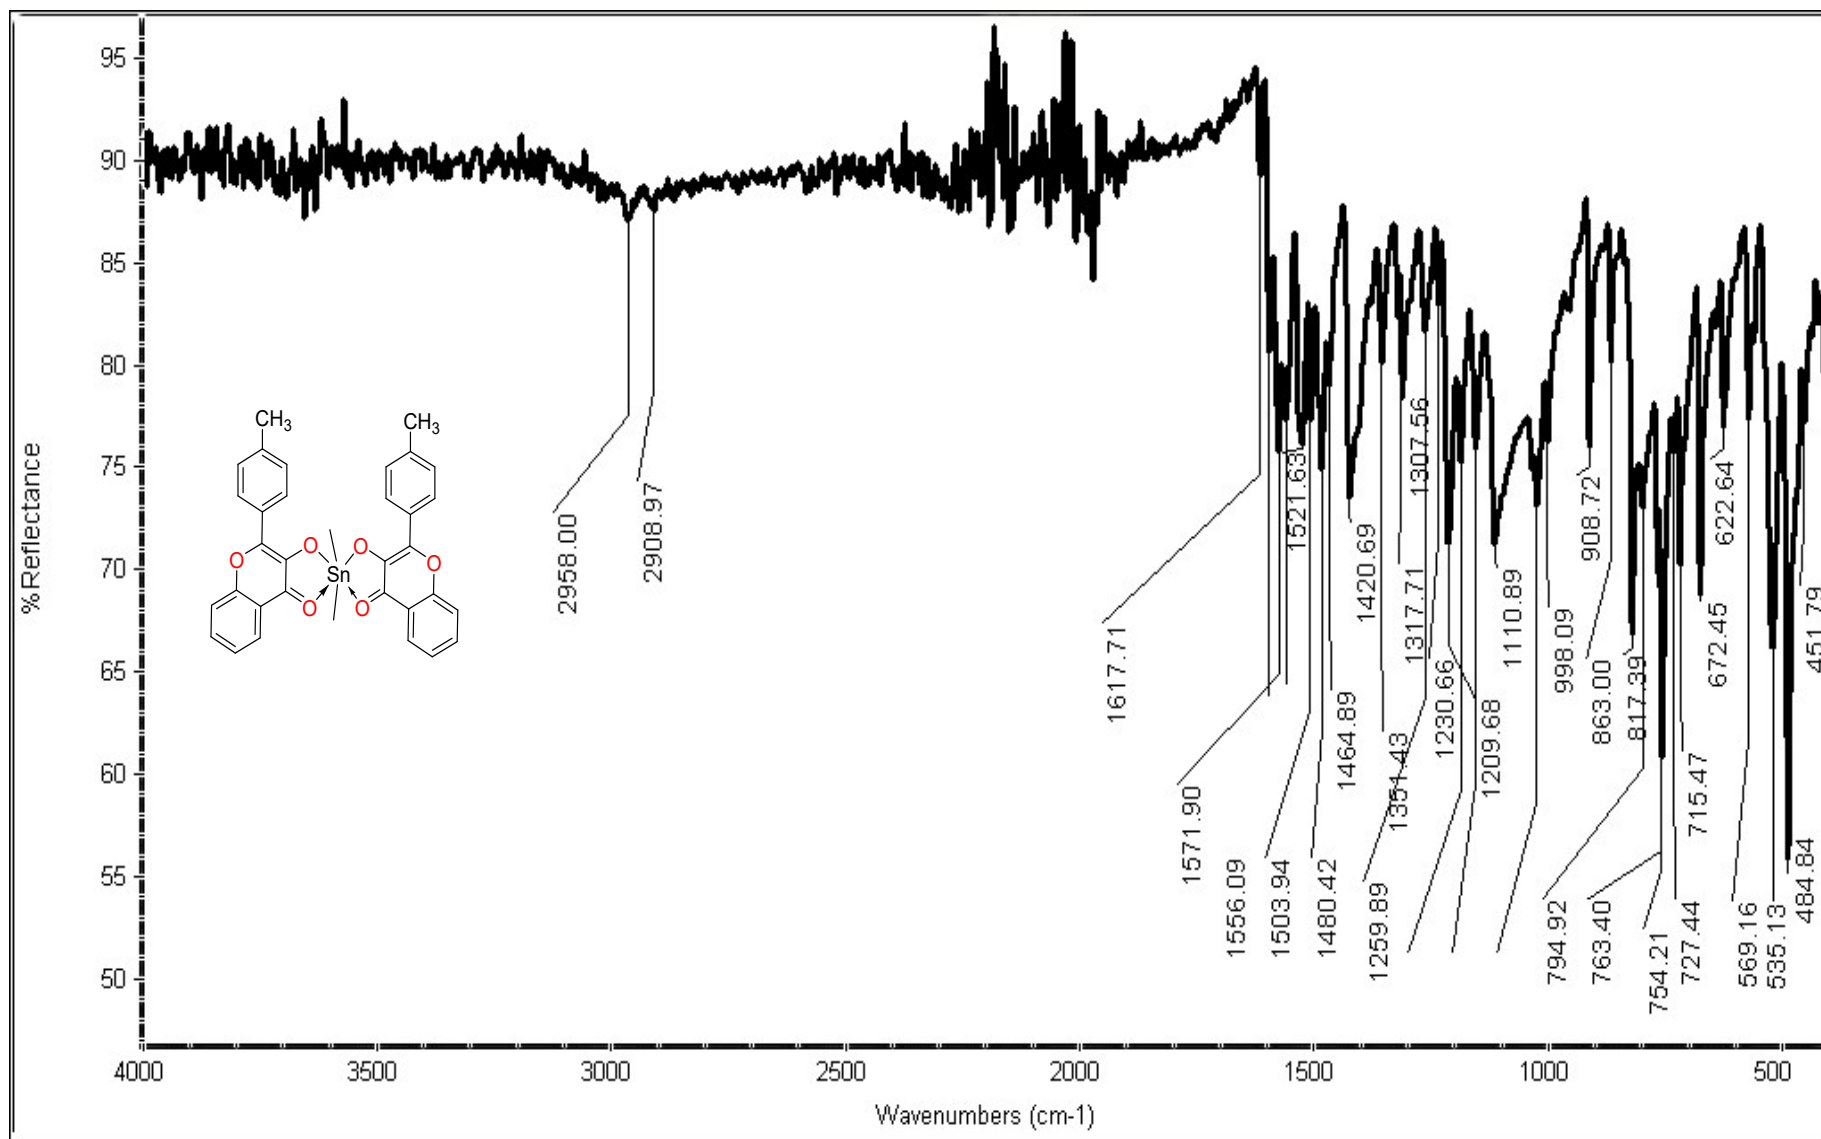

**Figure S20.** FT-IR spectrum of compound 4b.

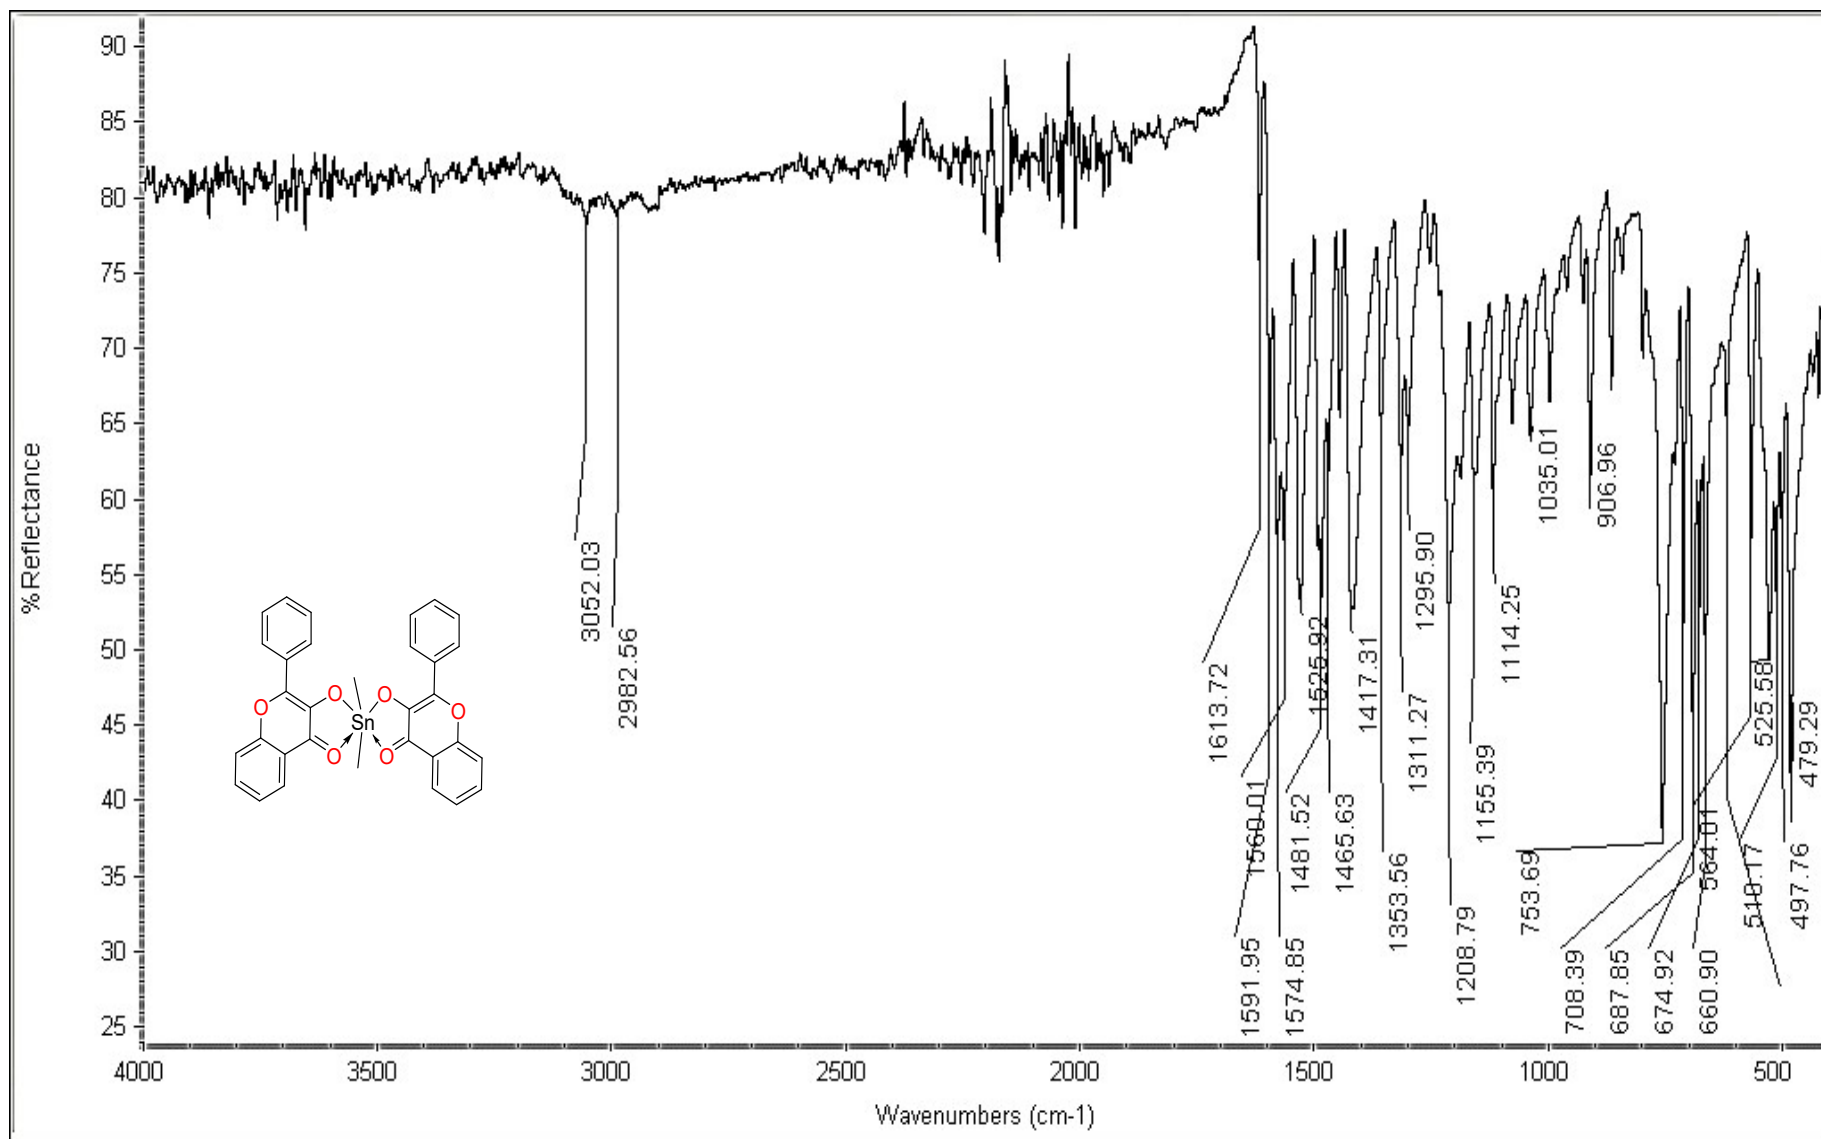

**Figure S21.** FT-IR spectrum of compound **5b**.

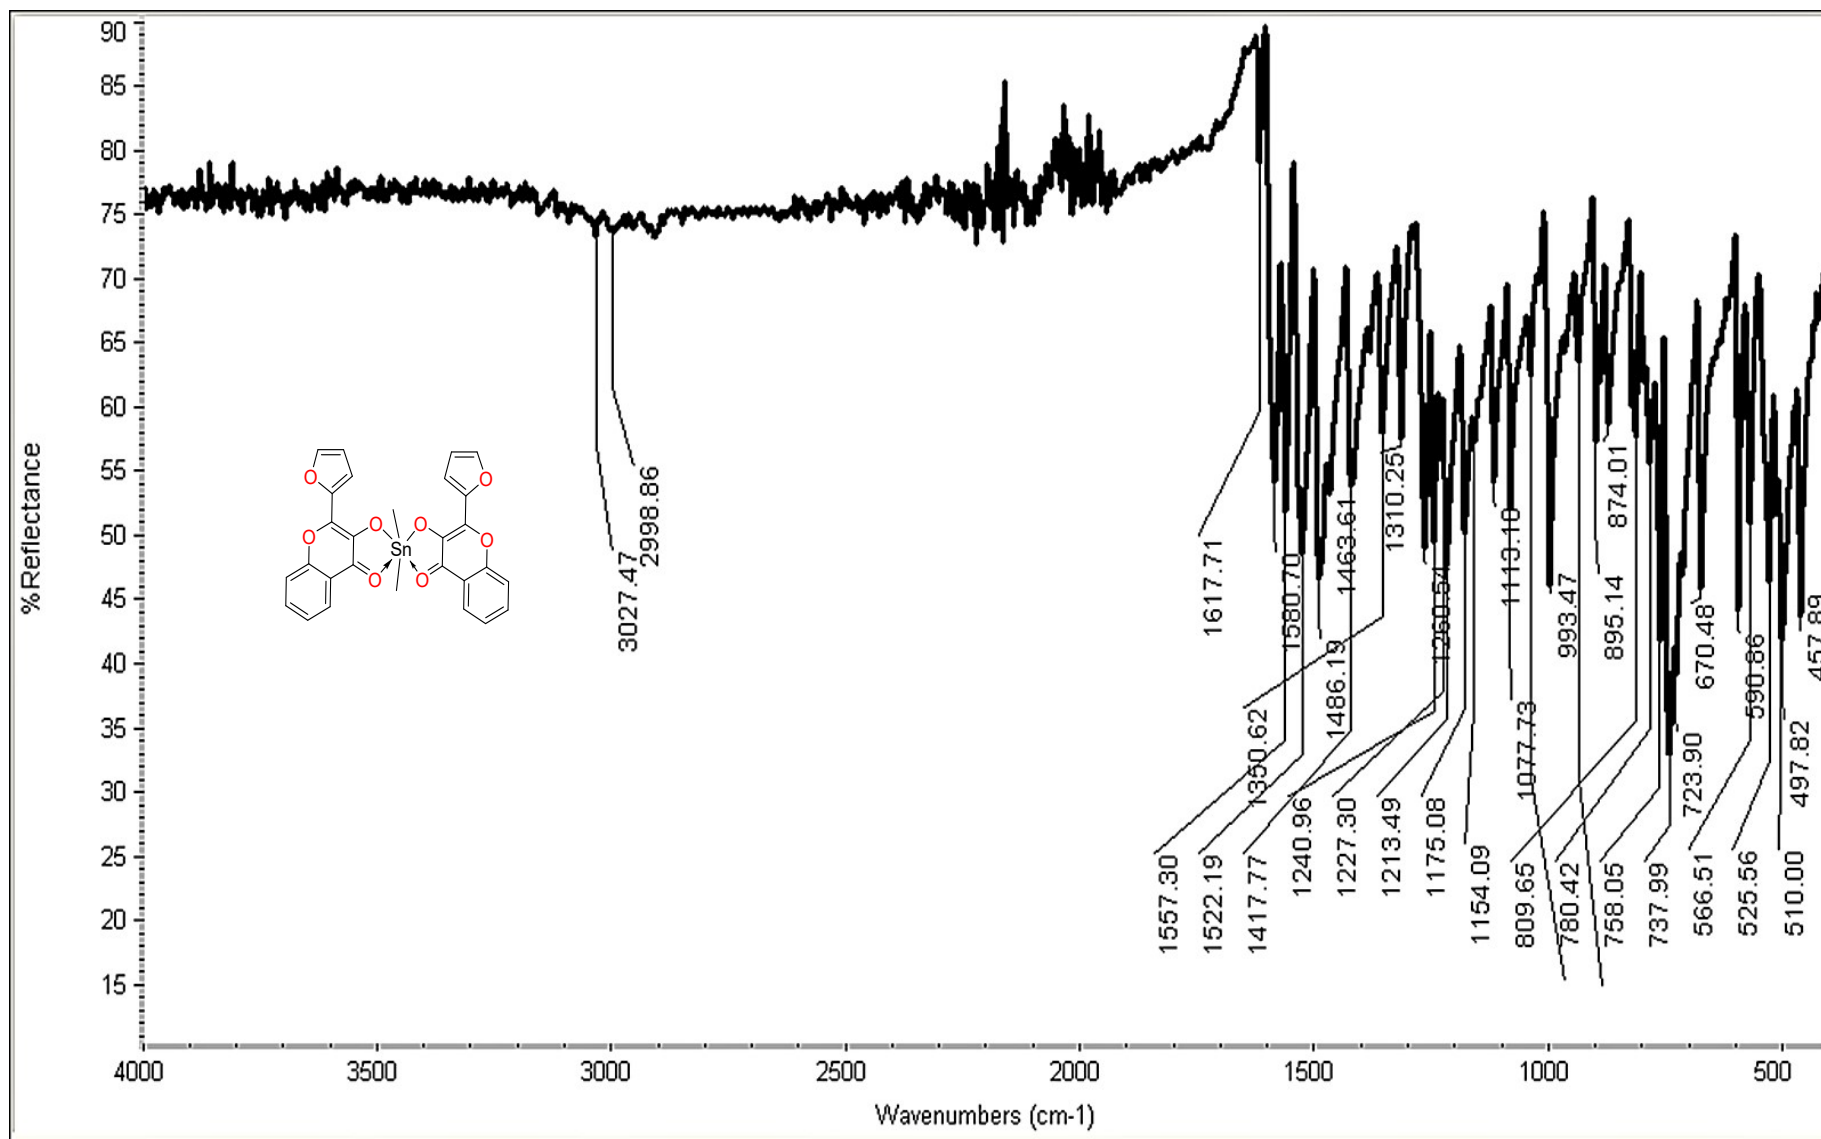

Figure S22. FT-IR spectrum of compound 6b.

## 2.2. $^1\text{H-NMR}$ spectra of compounds

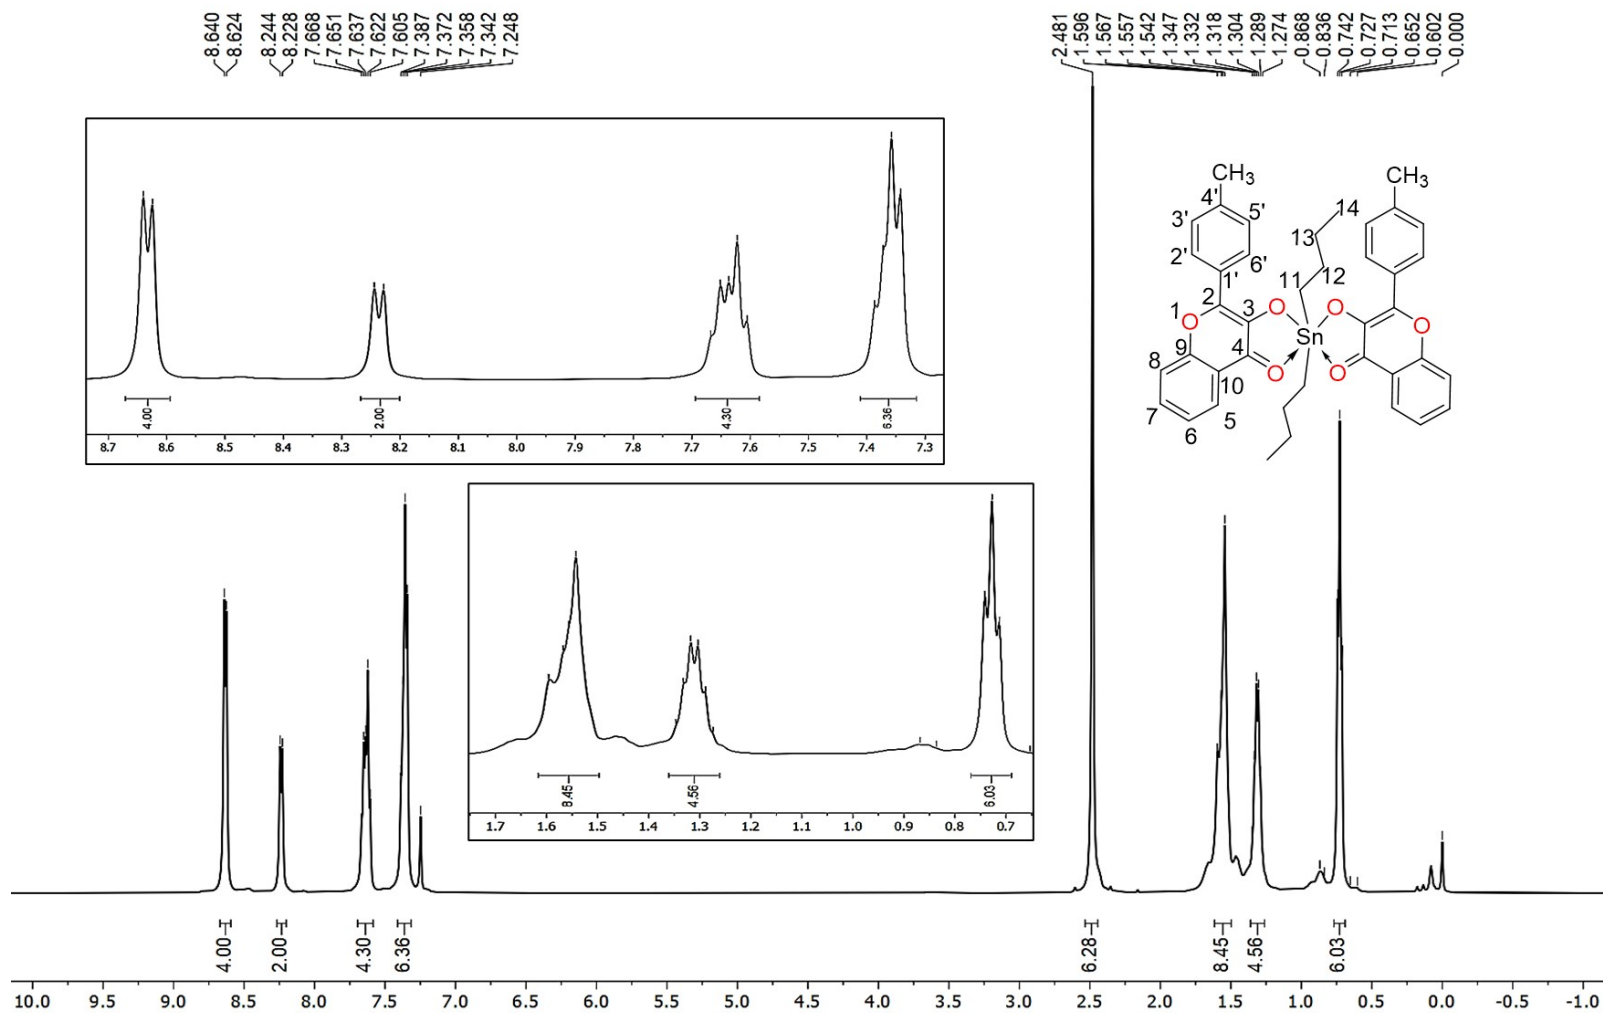

Figure S23.  $^1\text{H-NMR}$  spectrum of compound 4a.

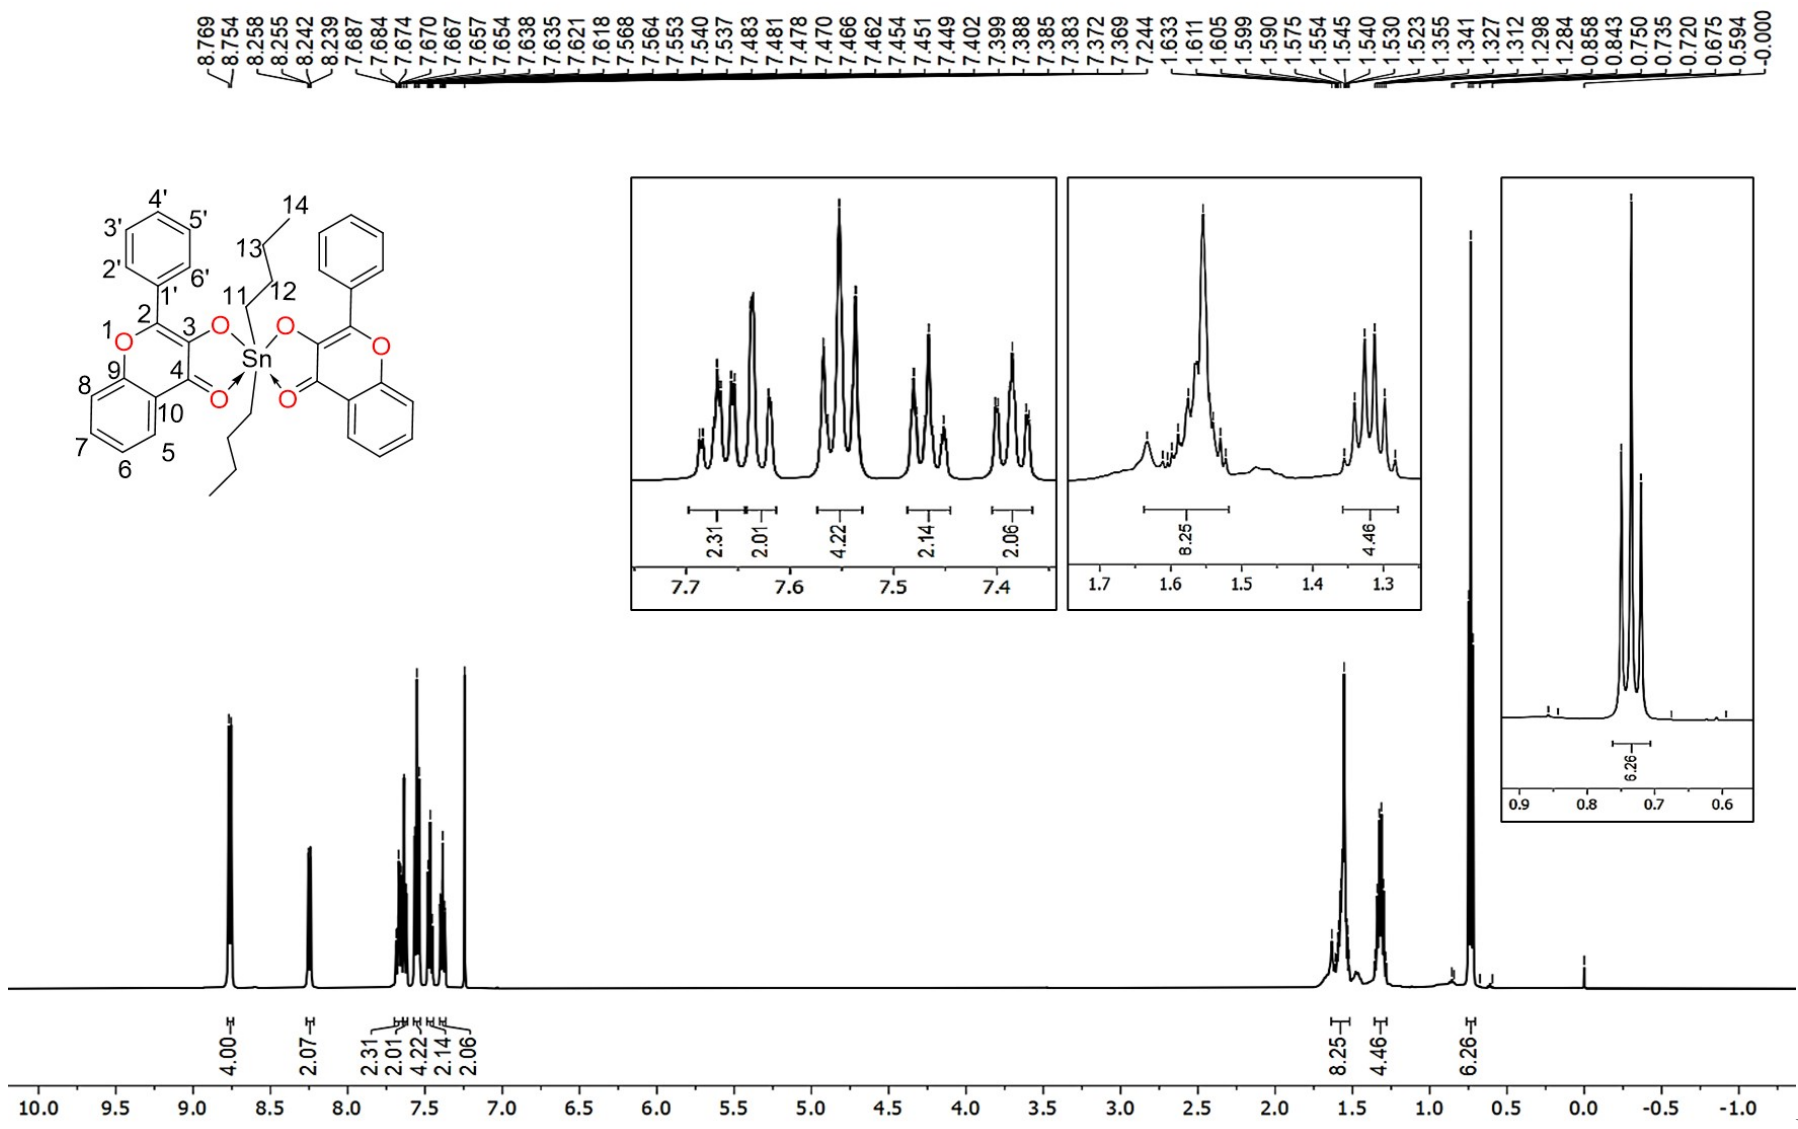

Fig

re S24. <sup>1</sup>H-NMR spectrum of compound 5a.

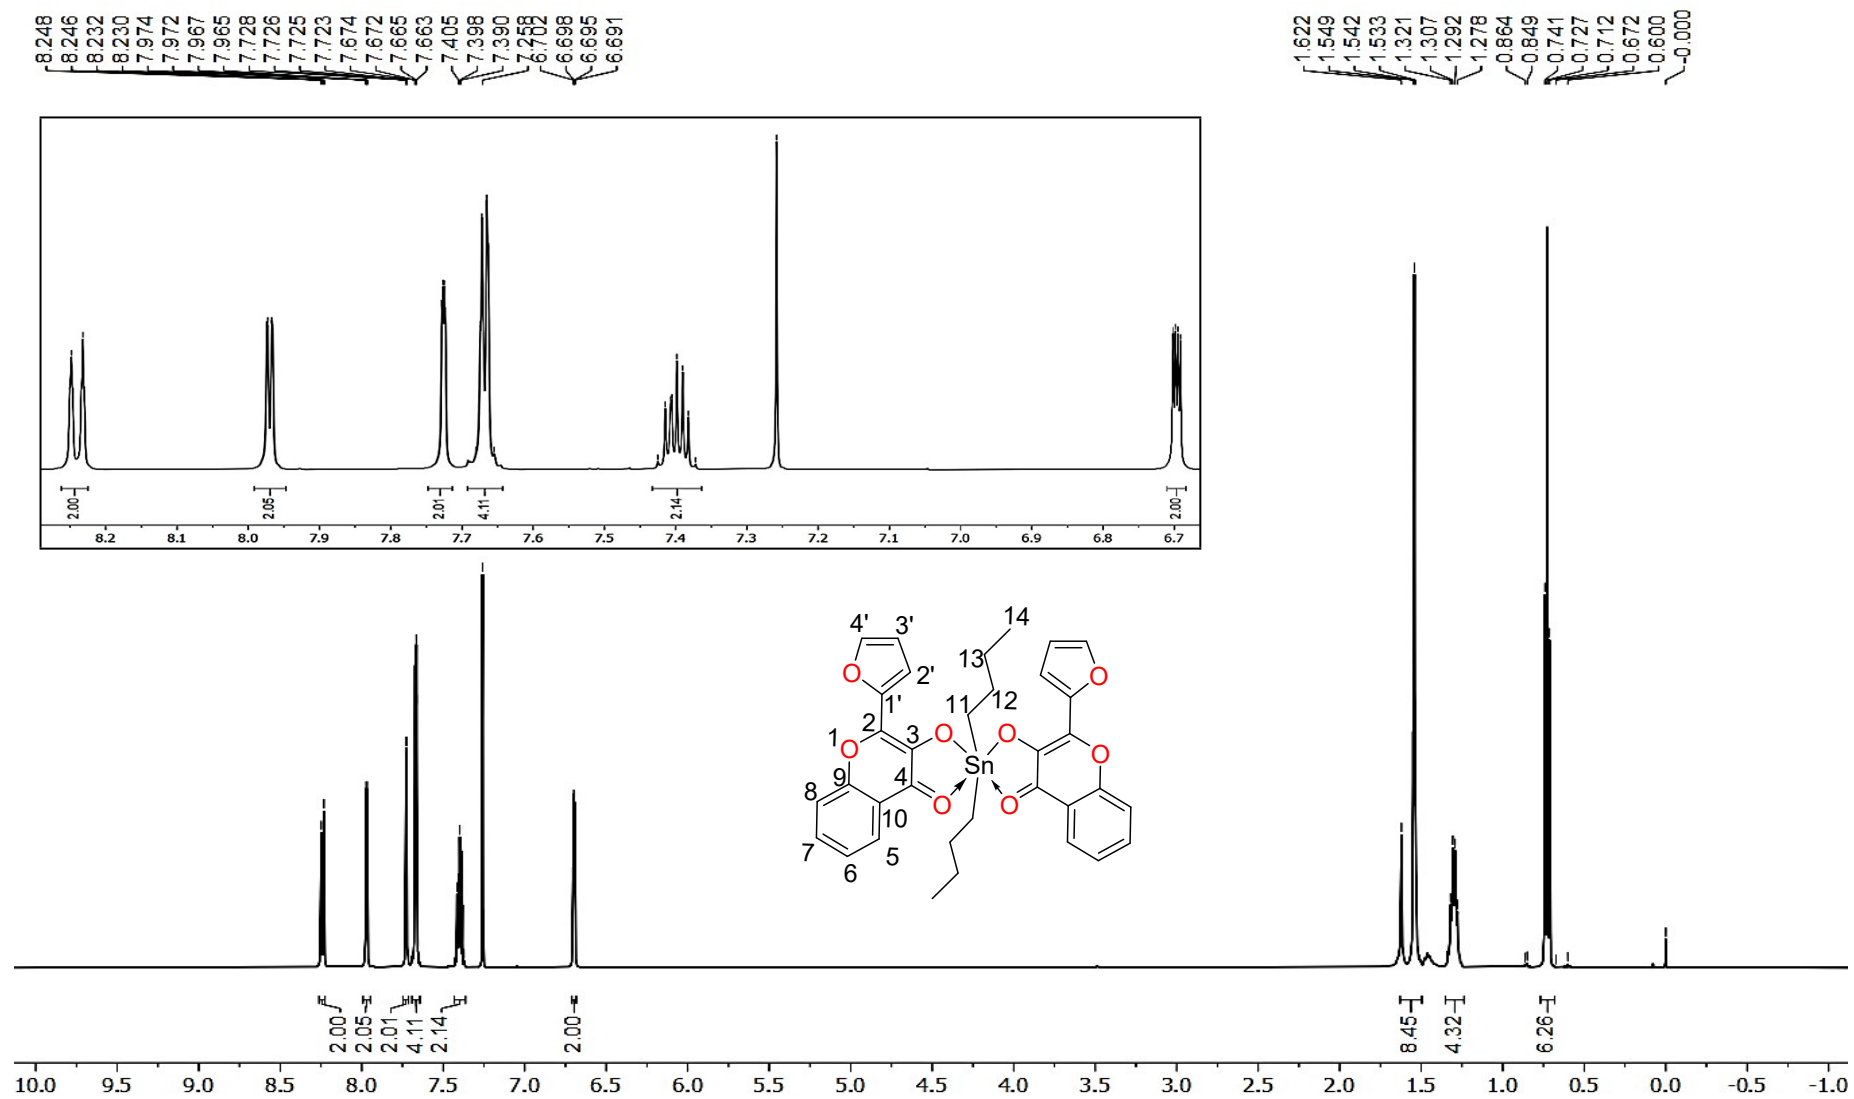

**Figure S25.**  $^1\text{H-NMR}$  spectrum of compound **6a**.



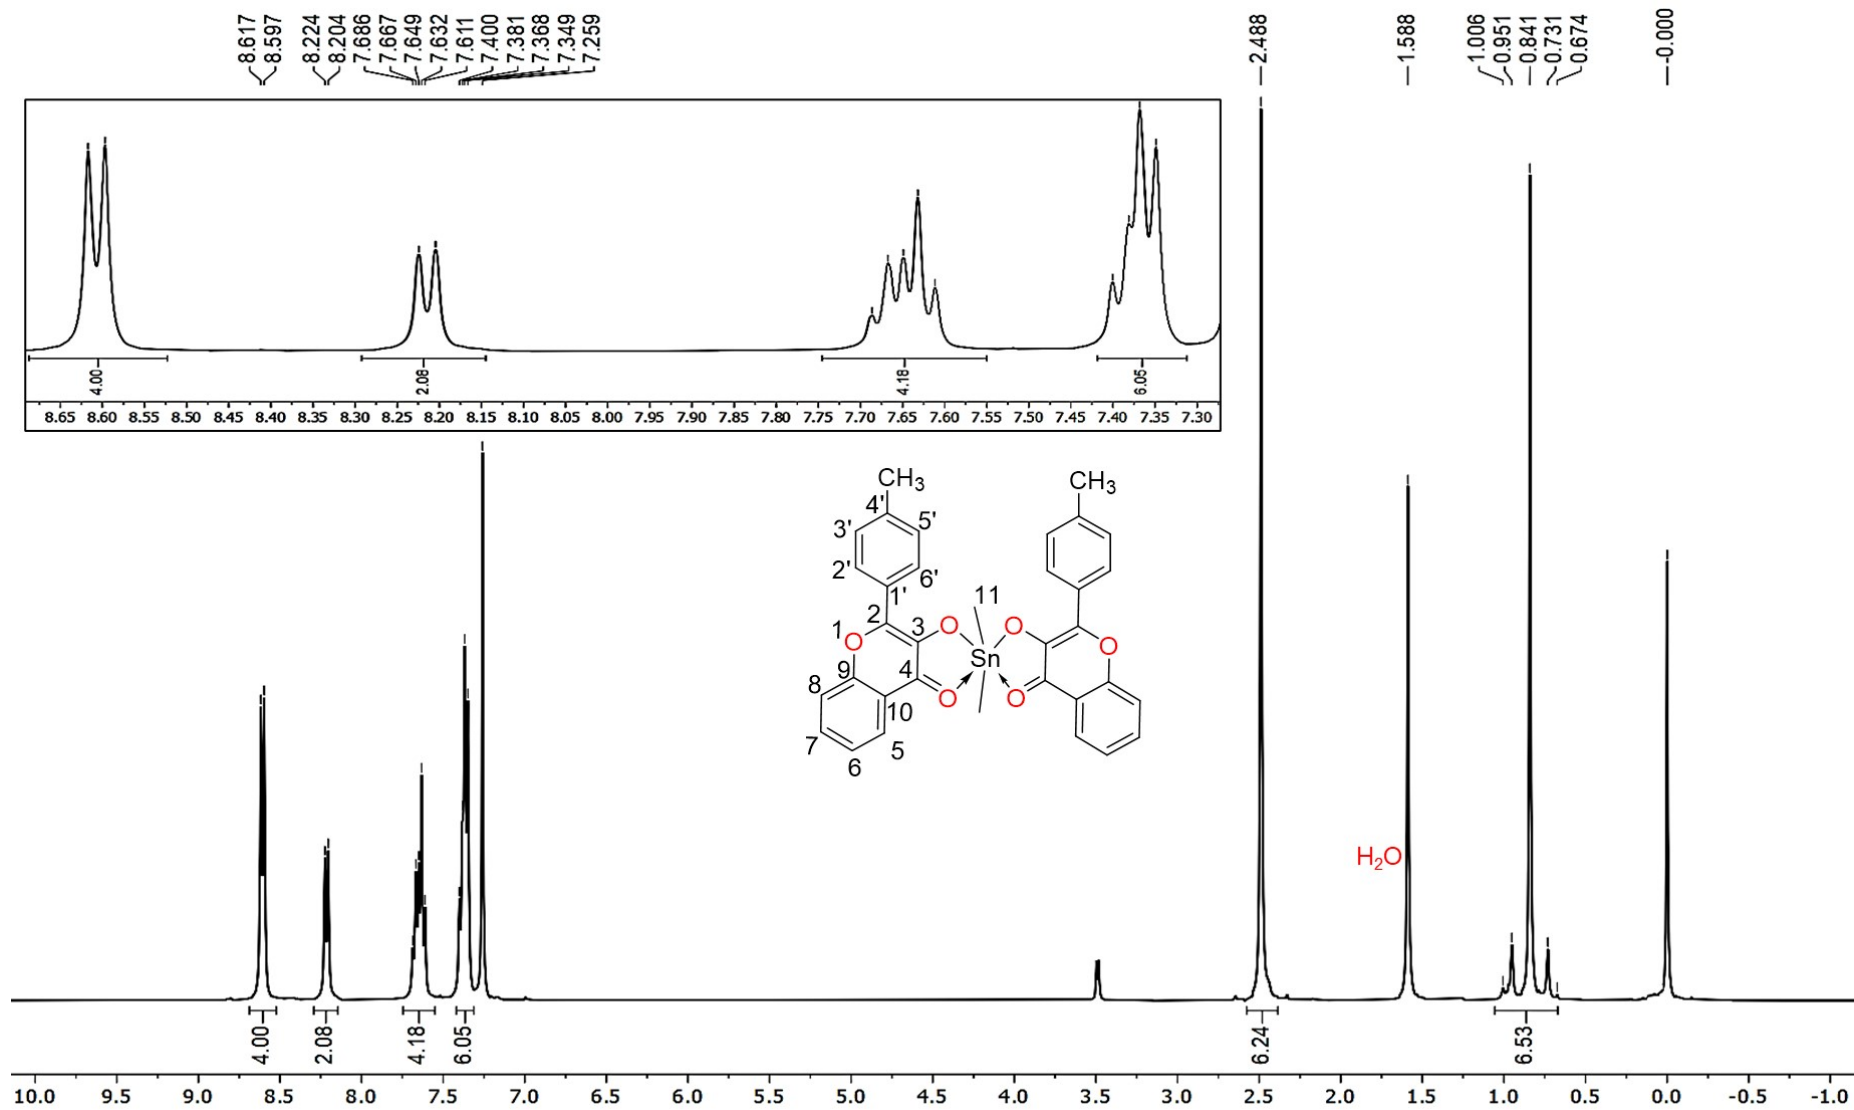

Figure S26. <sup>1</sup>H-NMR spectrum of compound **4b**.

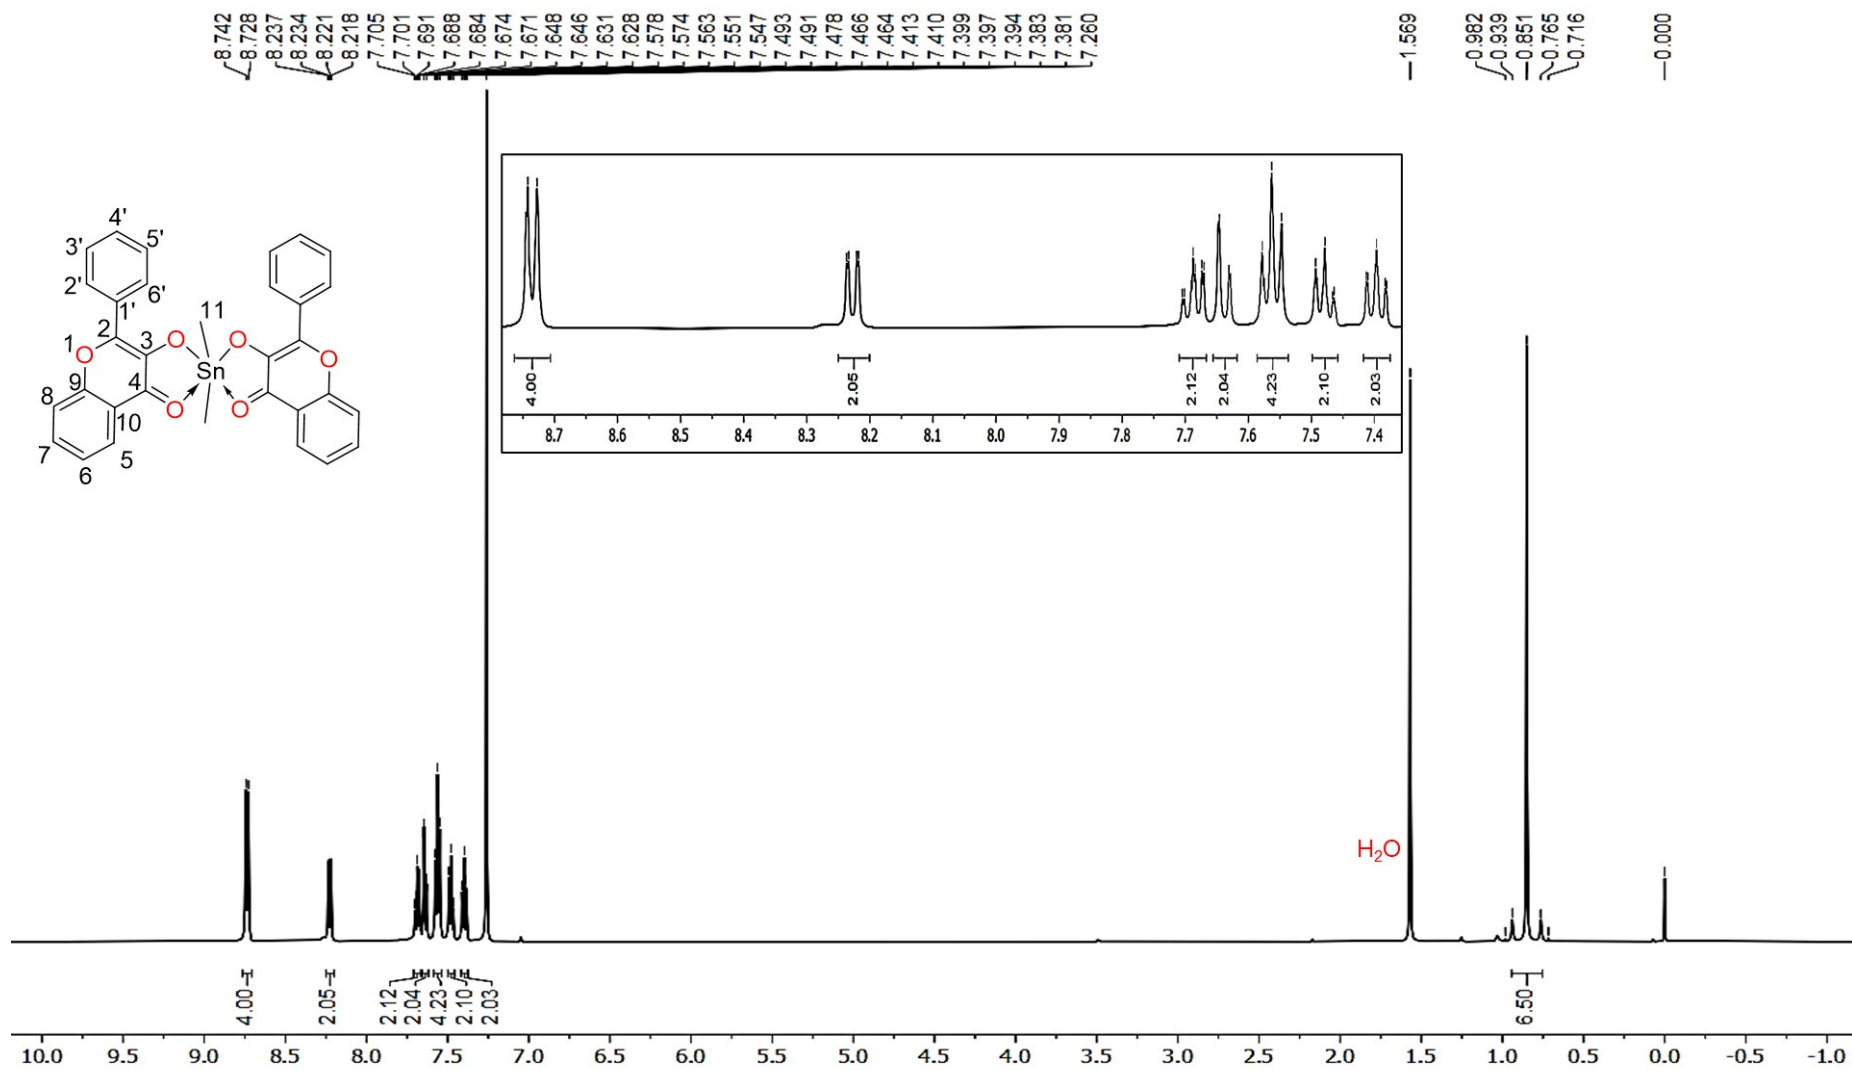

Figure S27.  $^1\text{H-NMR}$  spectrum of compound 5b.

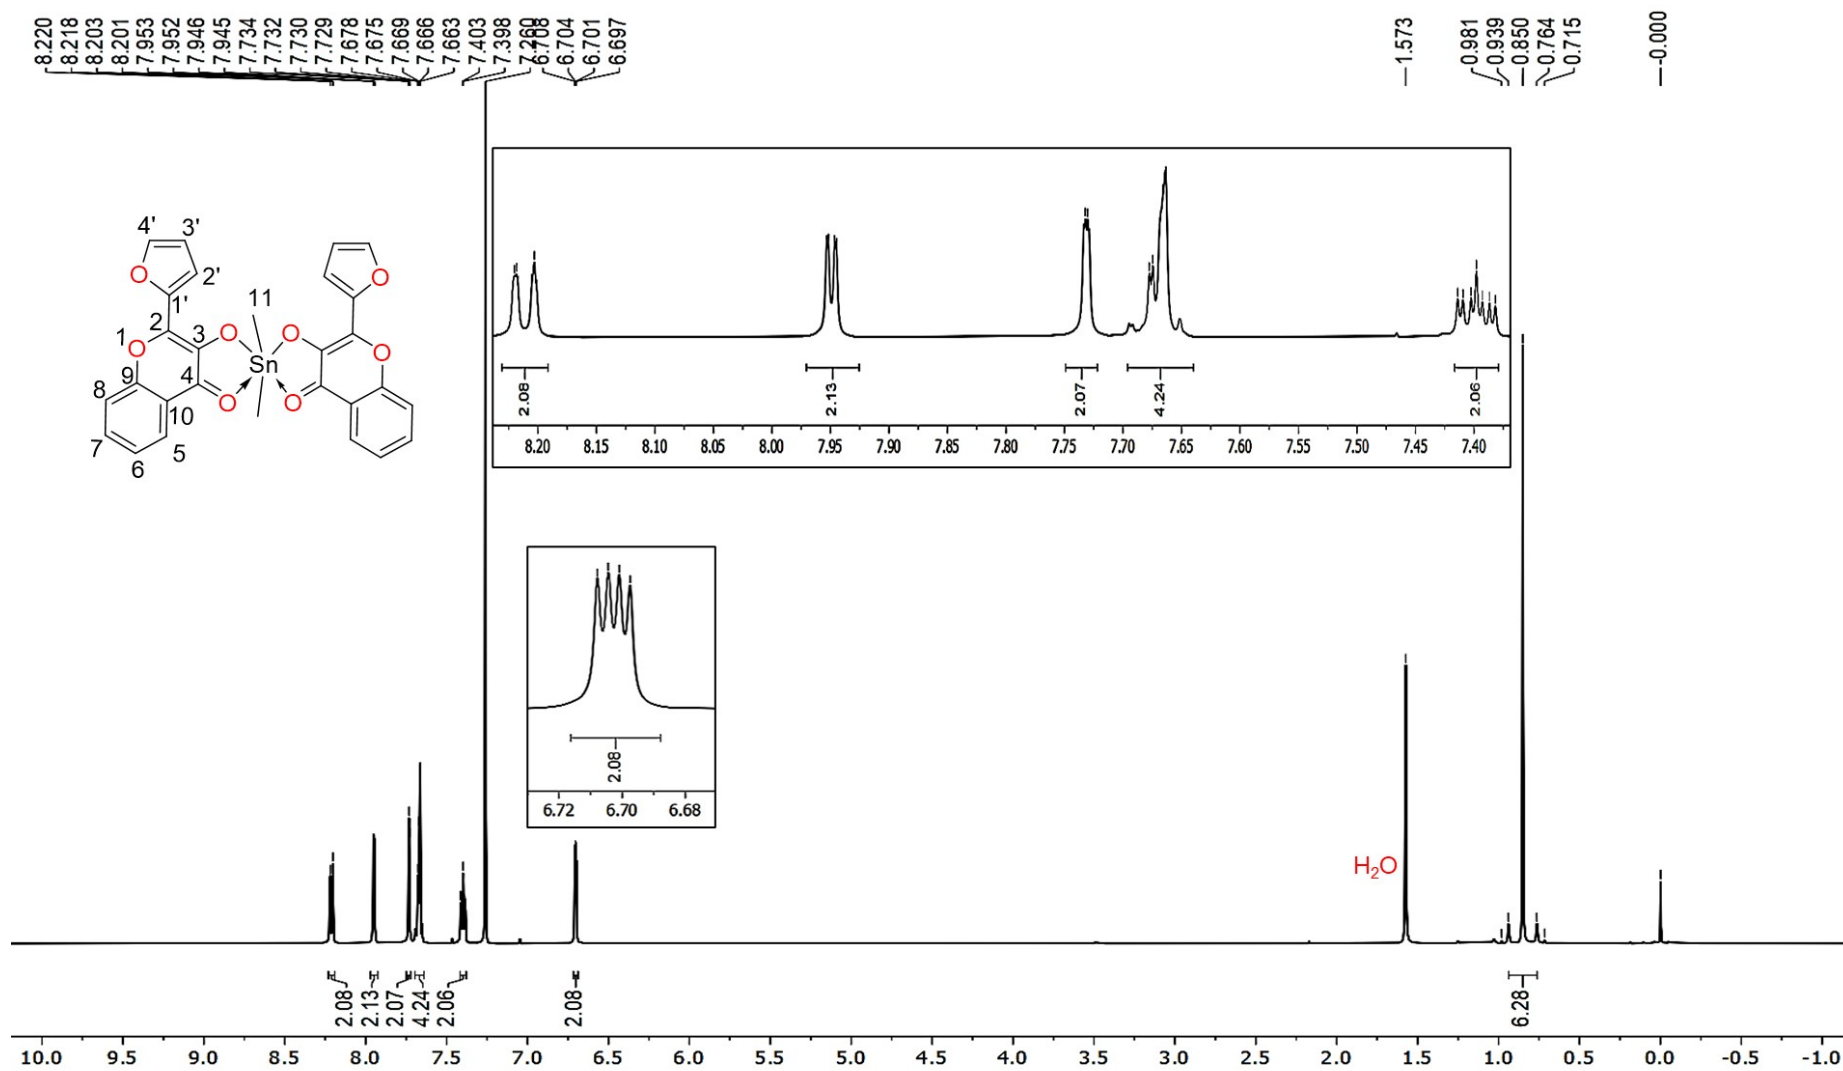

Figure S28.  $^1\text{H-NMR}$  spectrum of compound **6b**.

### 2.3. $^{13}\text{C}$ -NMR spectra of compounds

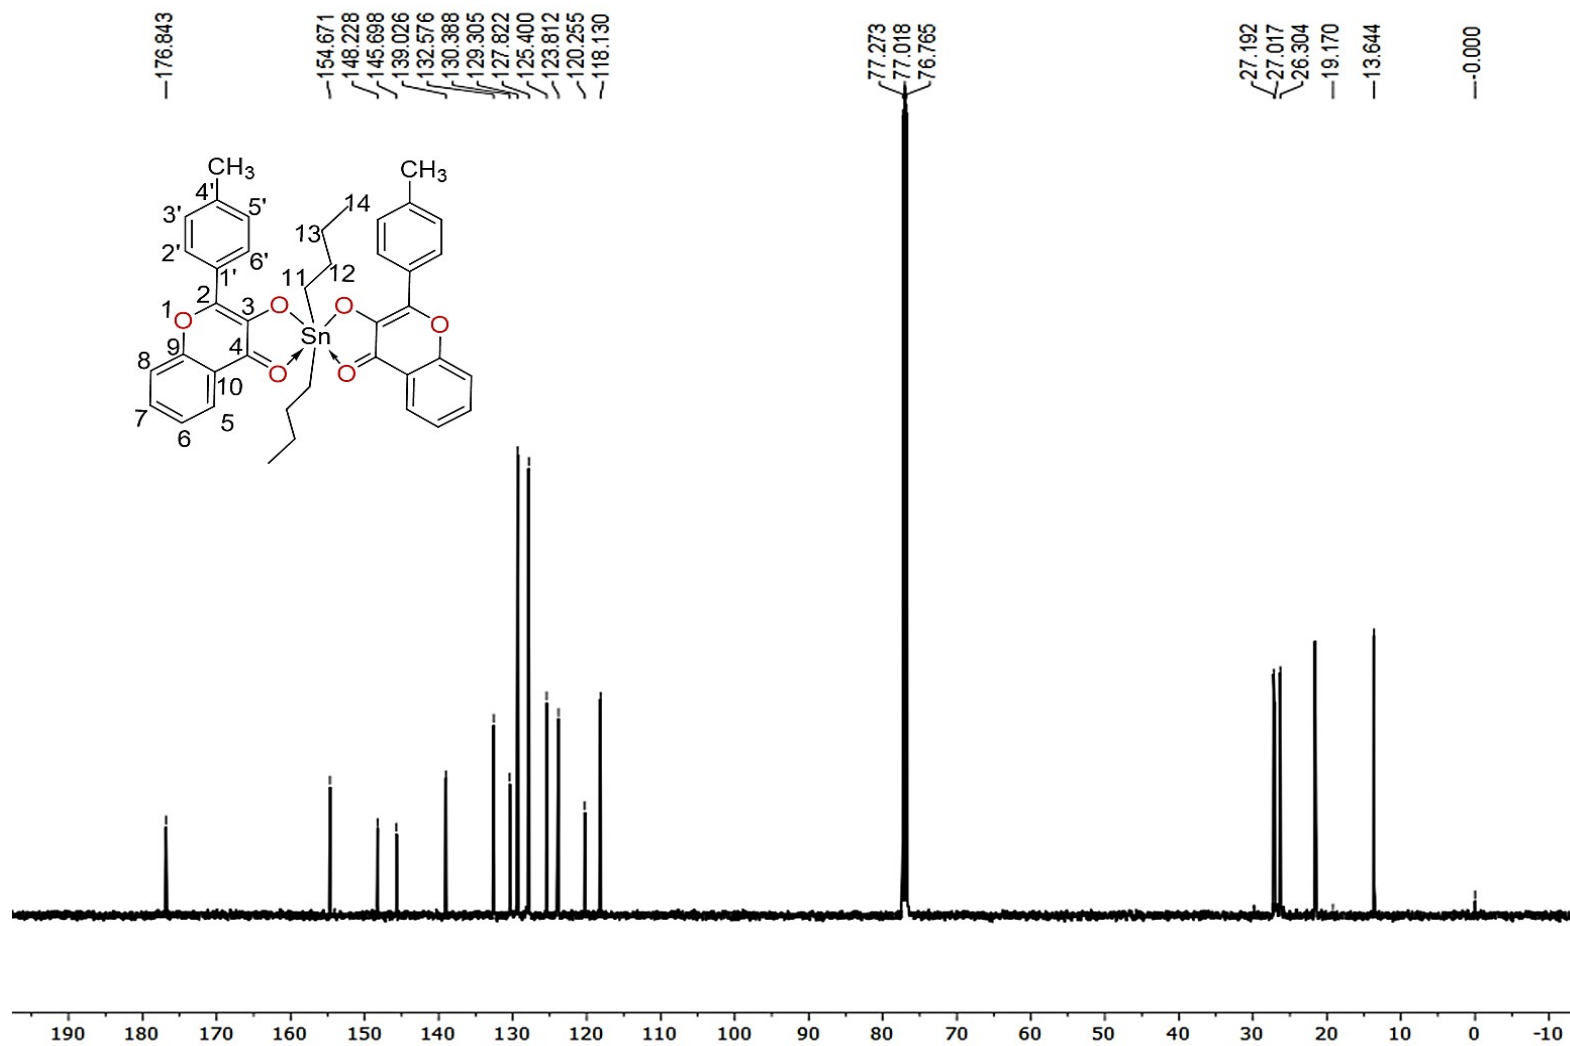

Figure S29.  $^{13}\text{C}$ -NMR spectrum of compound 4a.

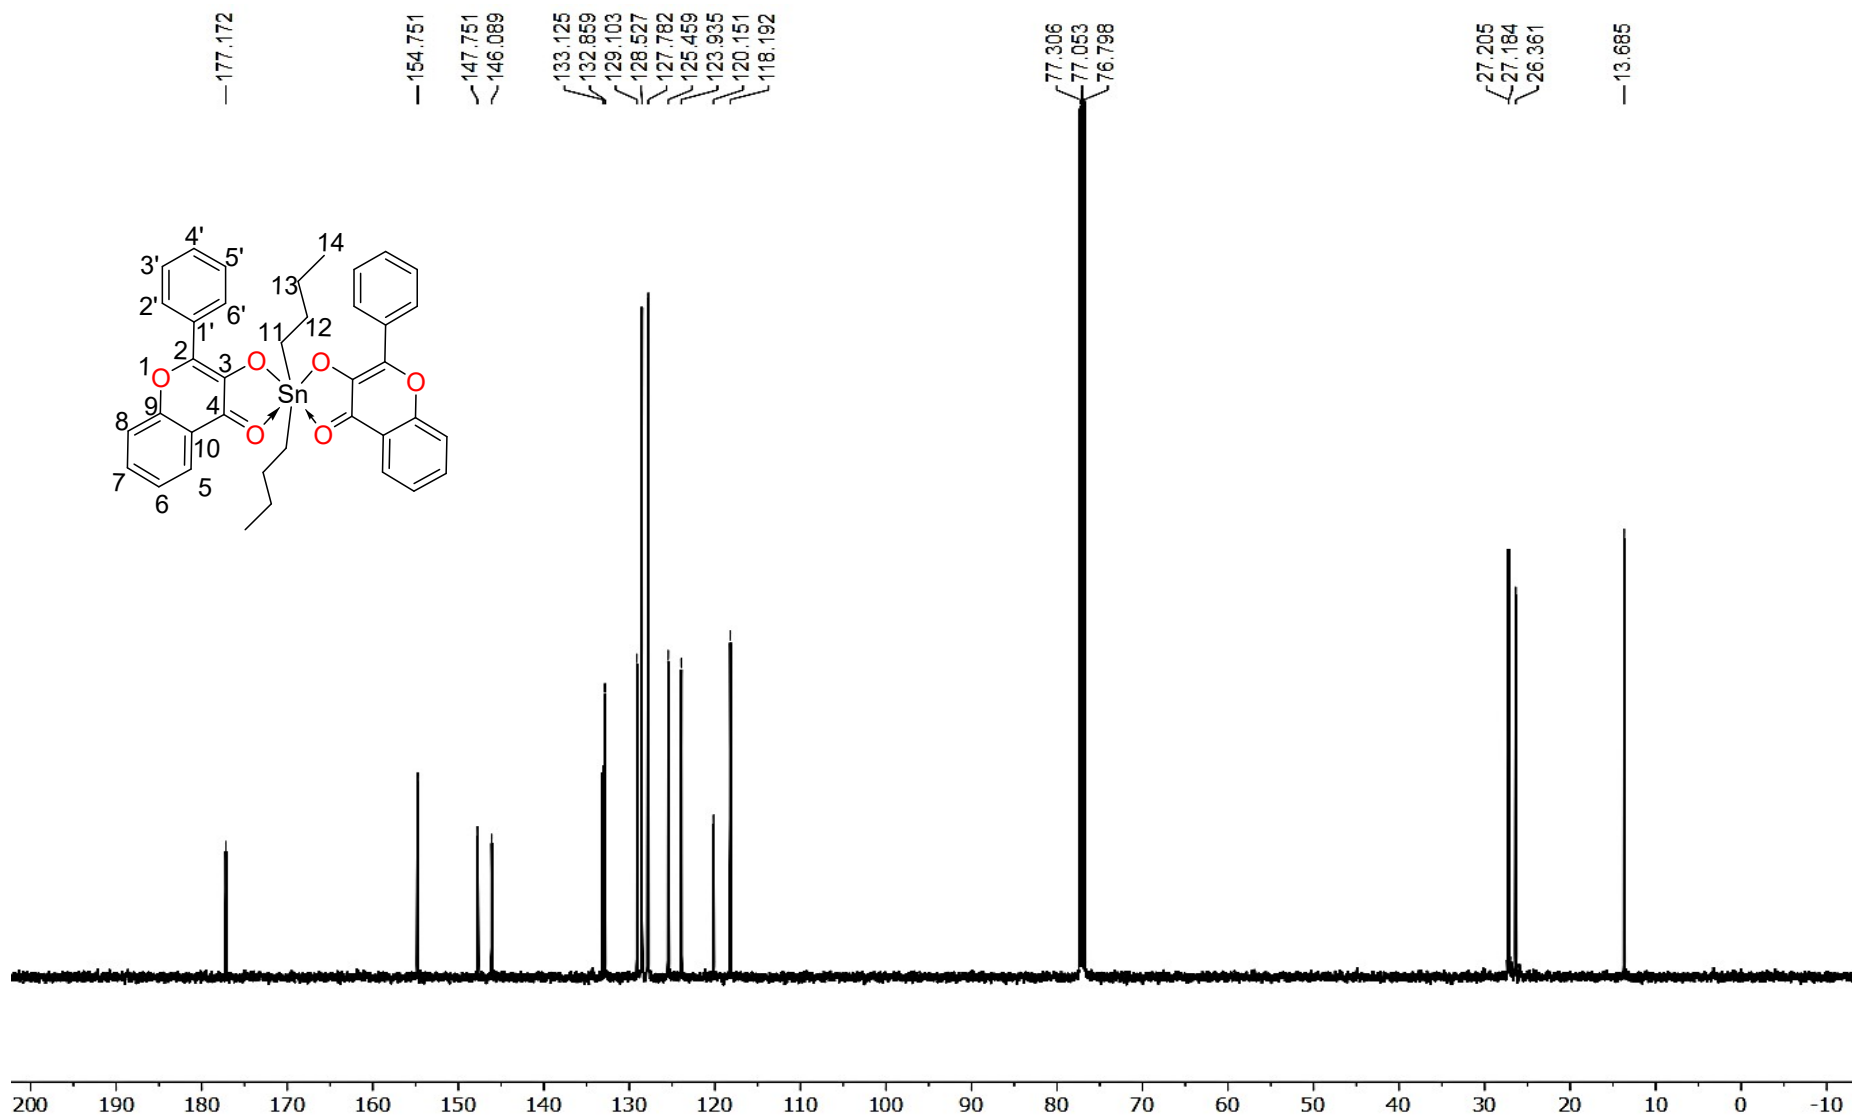

Figure S30. <sup>13</sup>C-NMR spectrum of compound 5a.

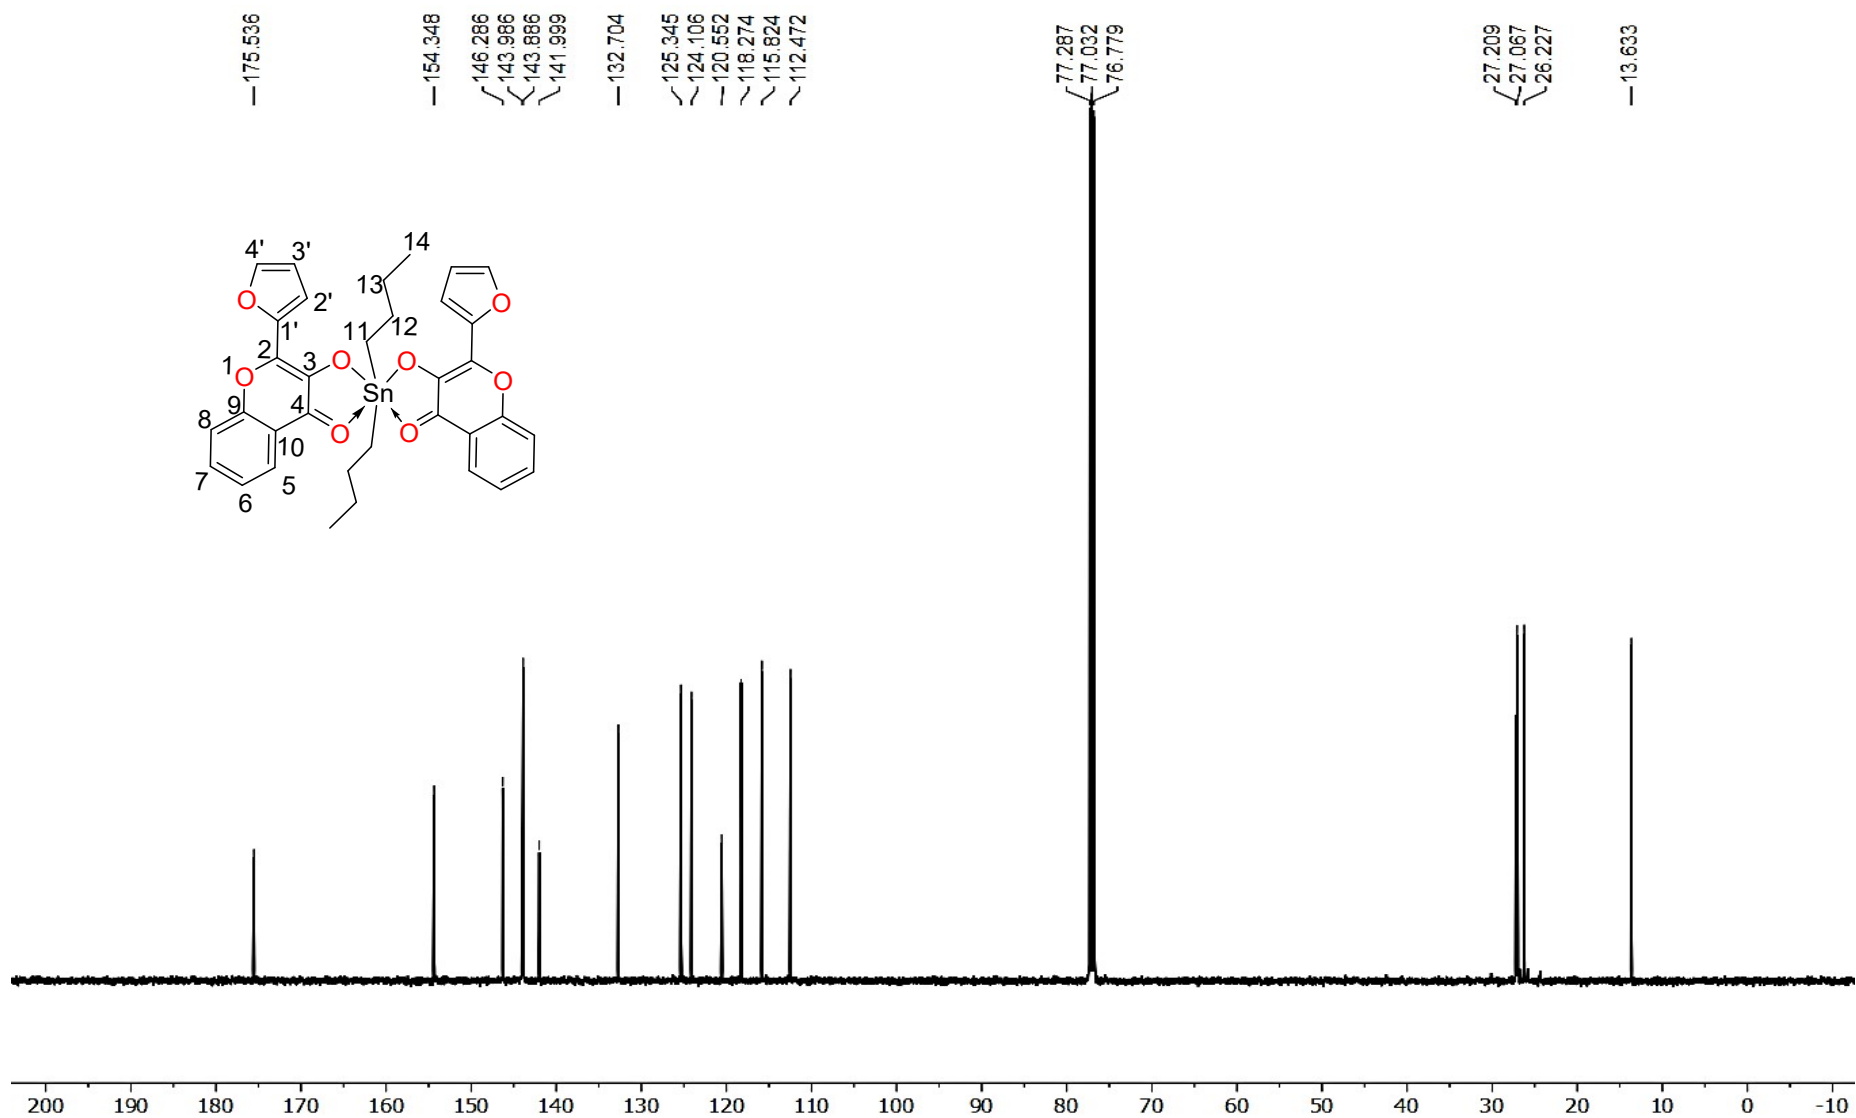

Figure S31.  $^{13}\text{C}$ -NMR spectrum of compound 6a.

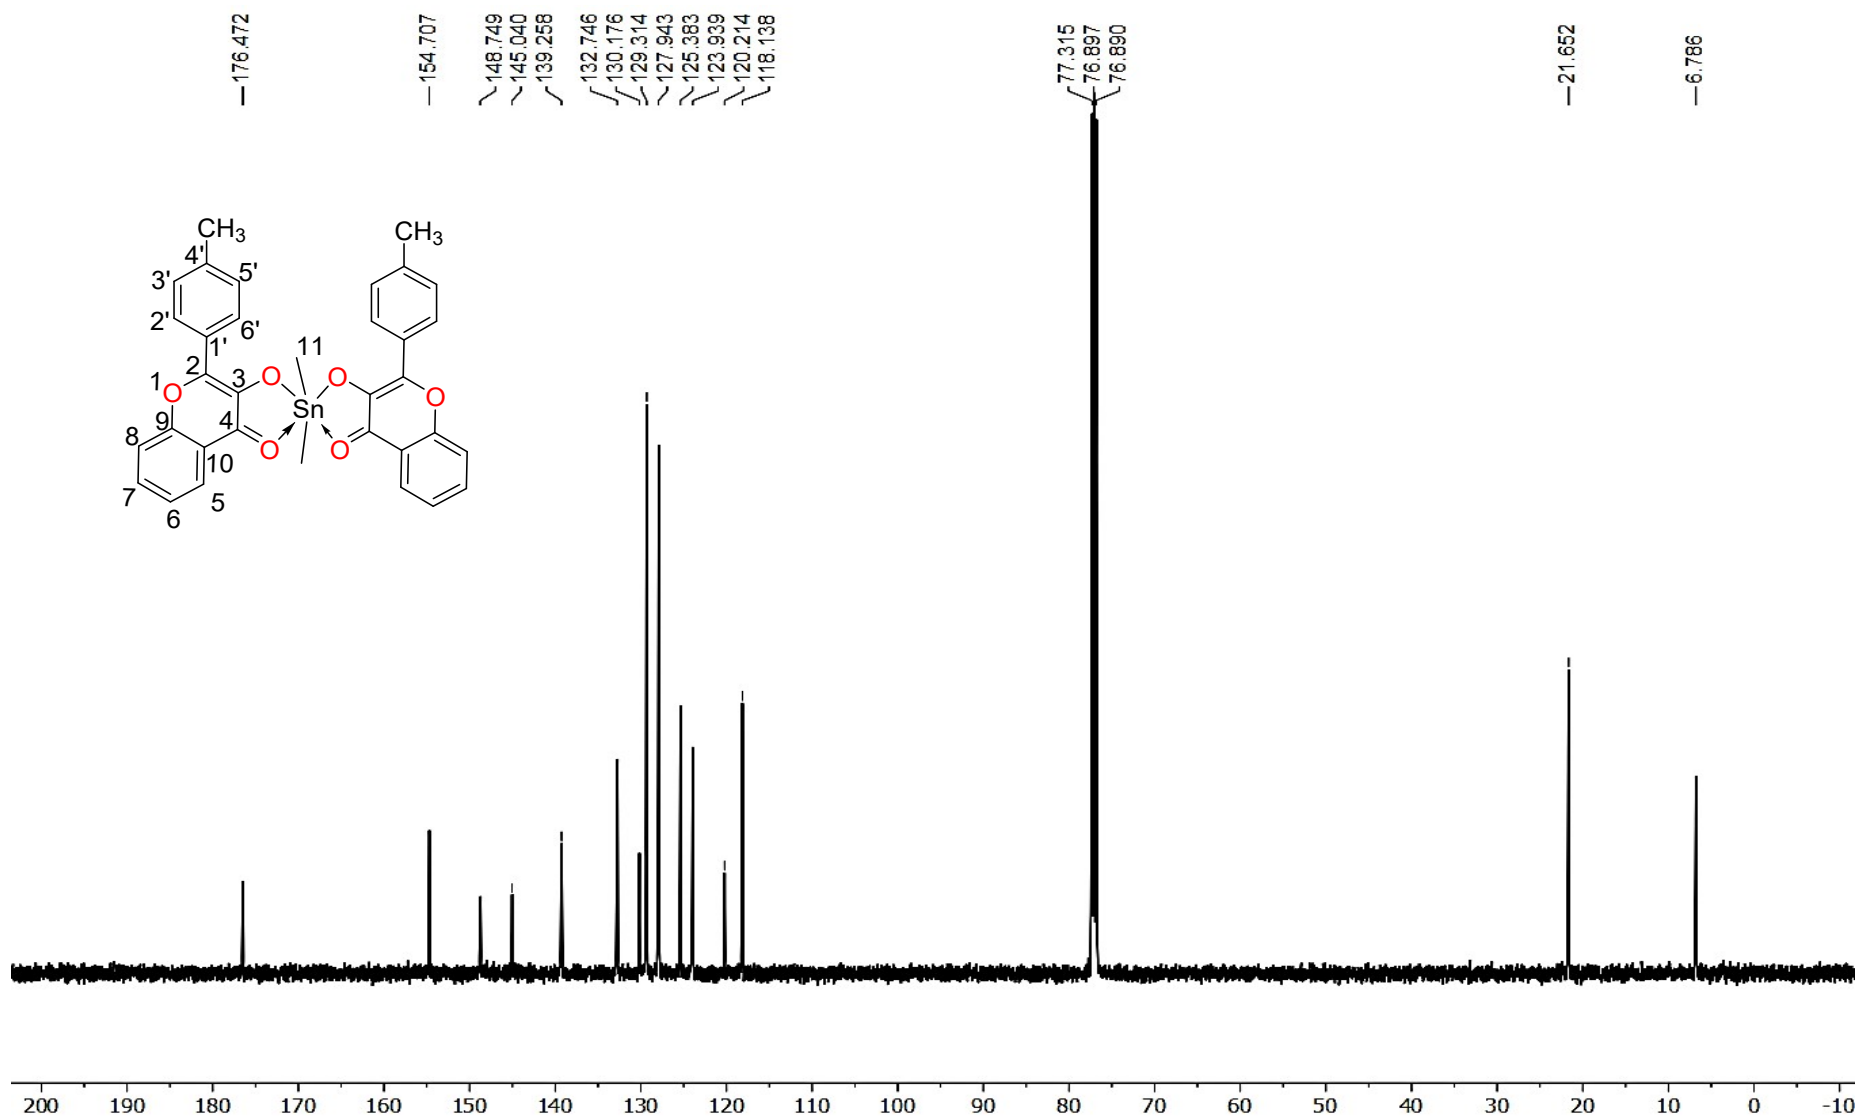

Figure S32. <sup>13</sup>C-NMR spectrum of compound **4b**.

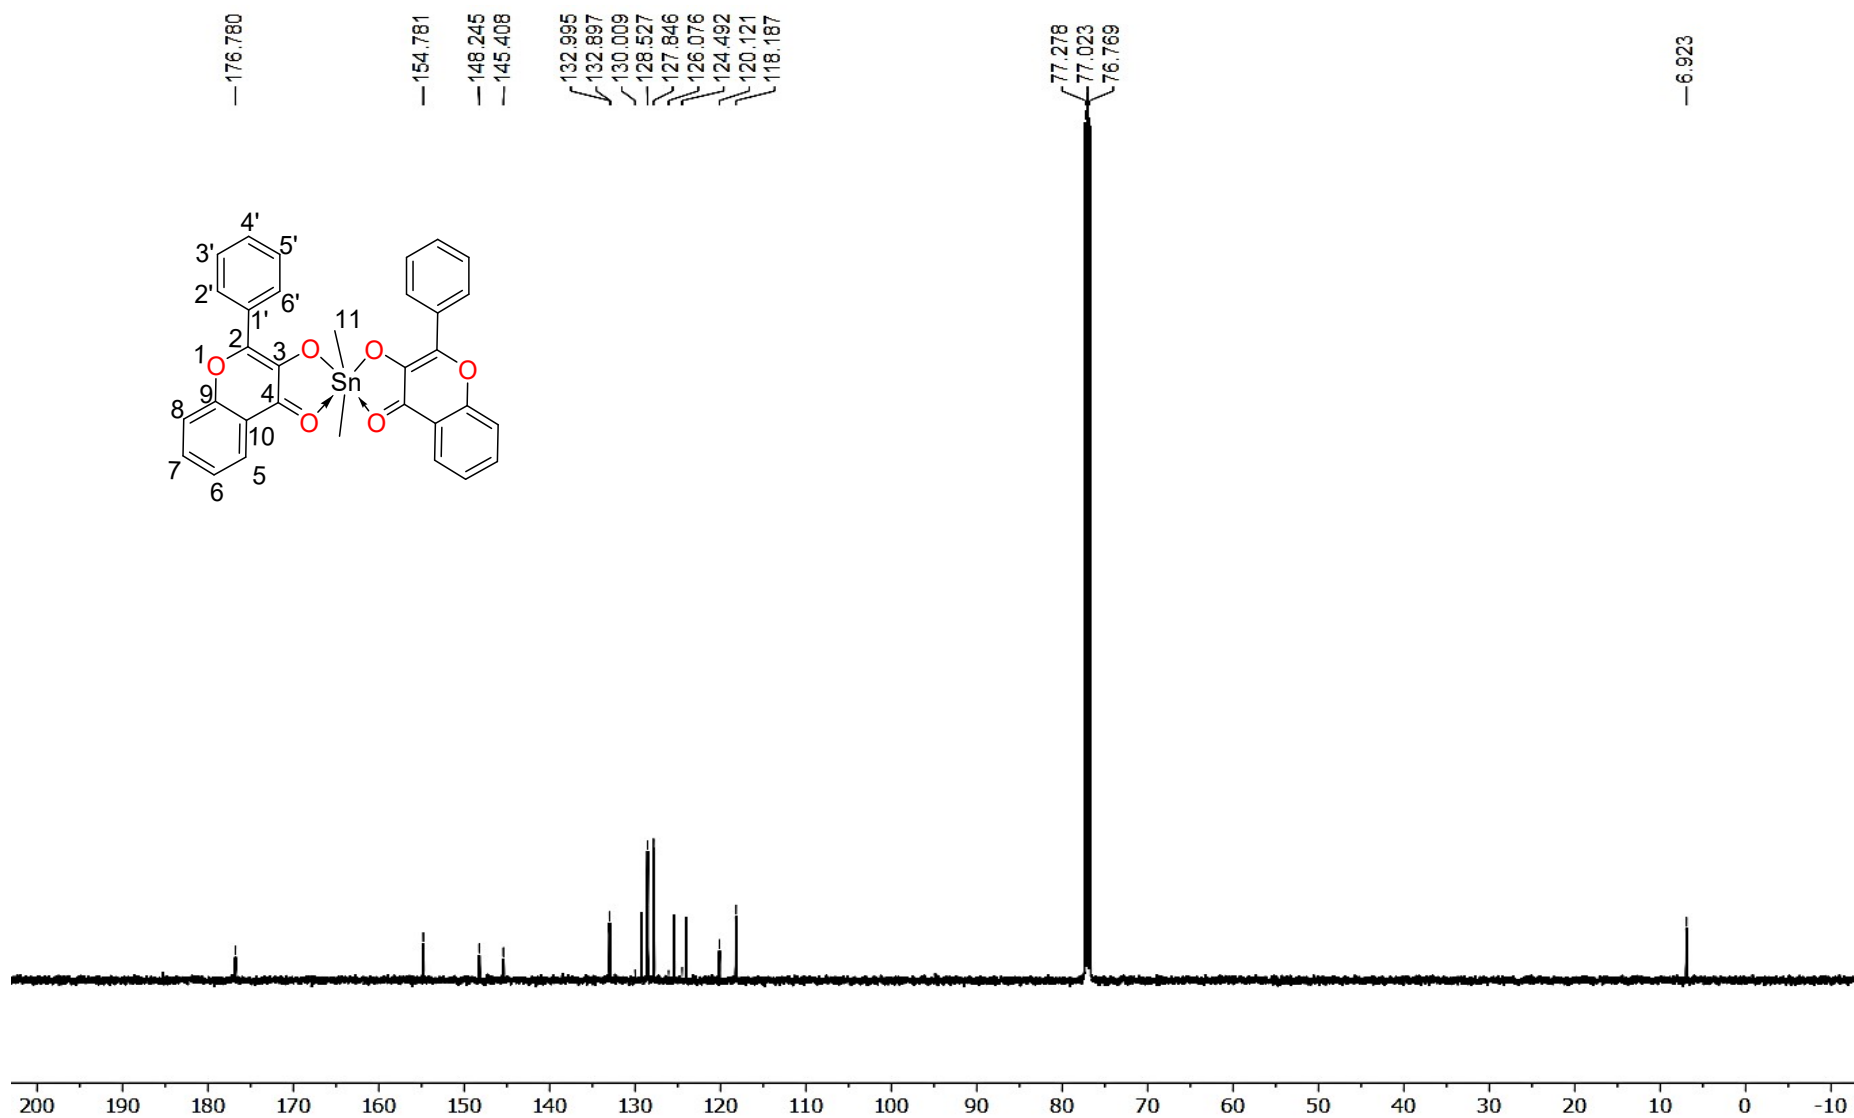

Figure S33. <sup>13</sup>C-NMR spectrum of compound **5b**.



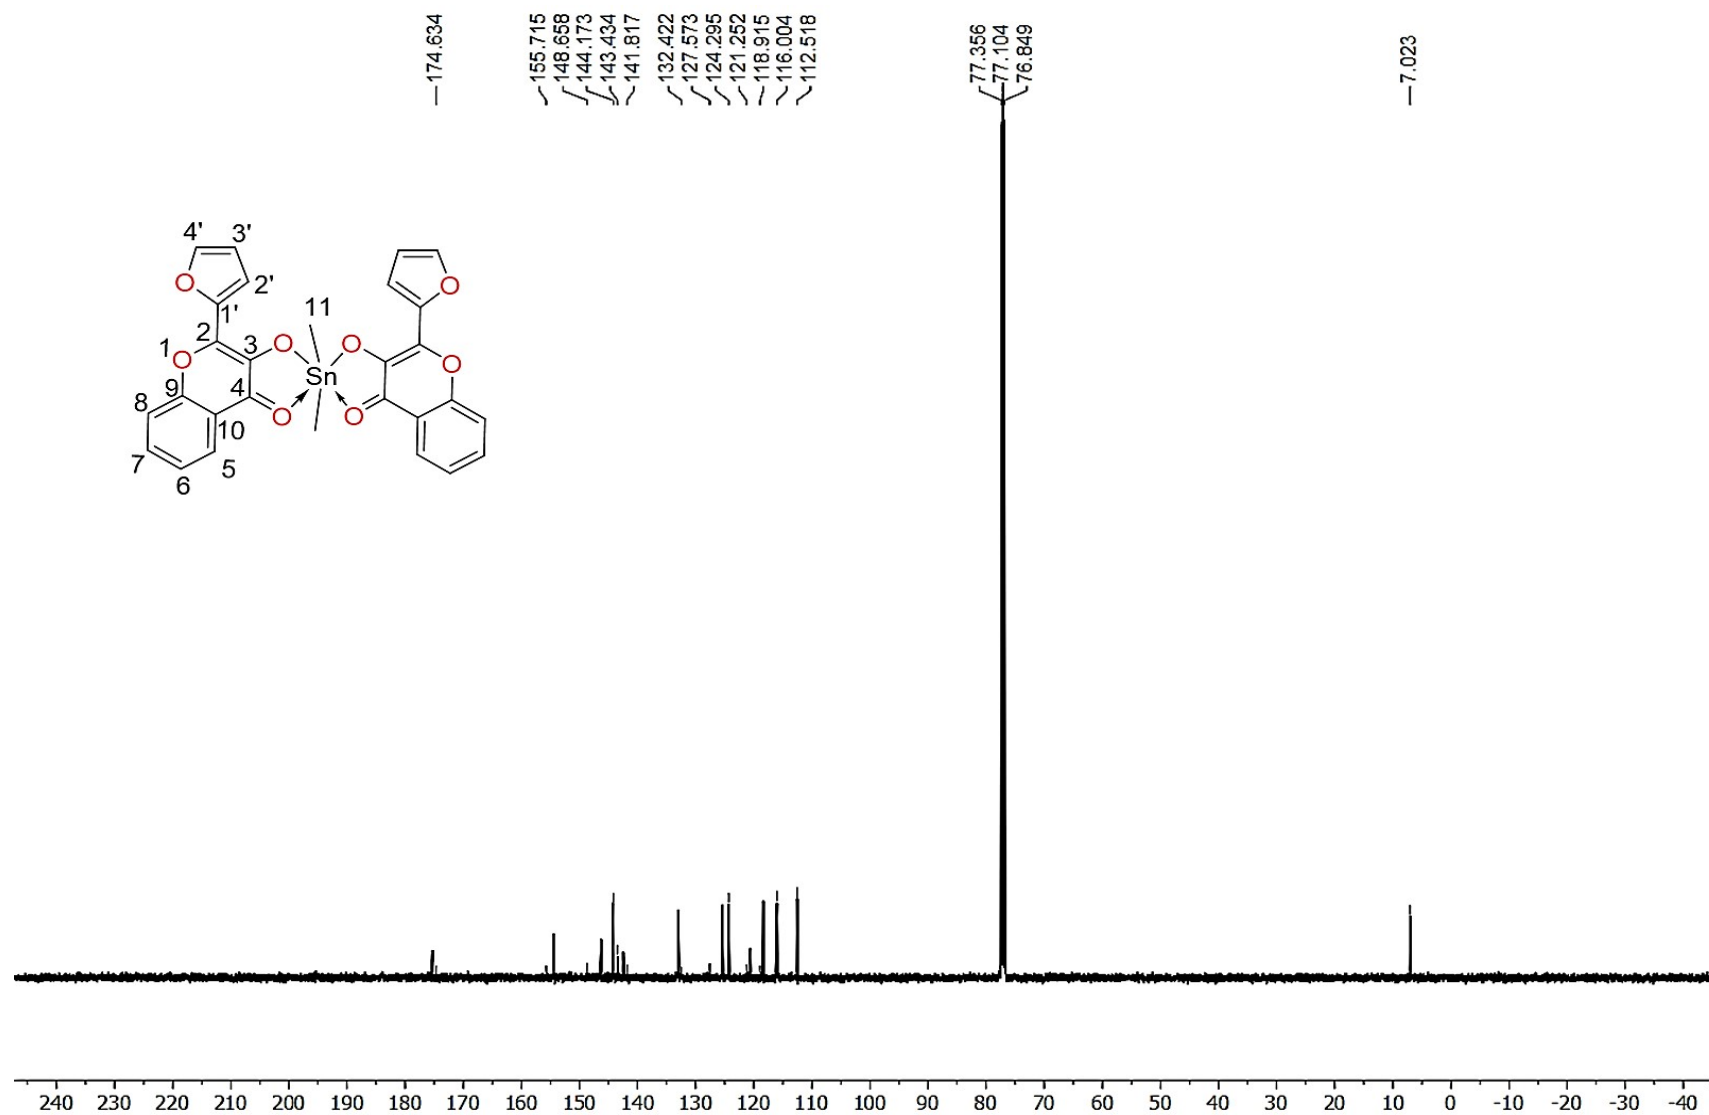

Figure S34. <sup>13</sup>C-NMR spectrum of compound **6b**.

2.4.  $^{119}\text{Sn}$ -NMR spectra of compounds

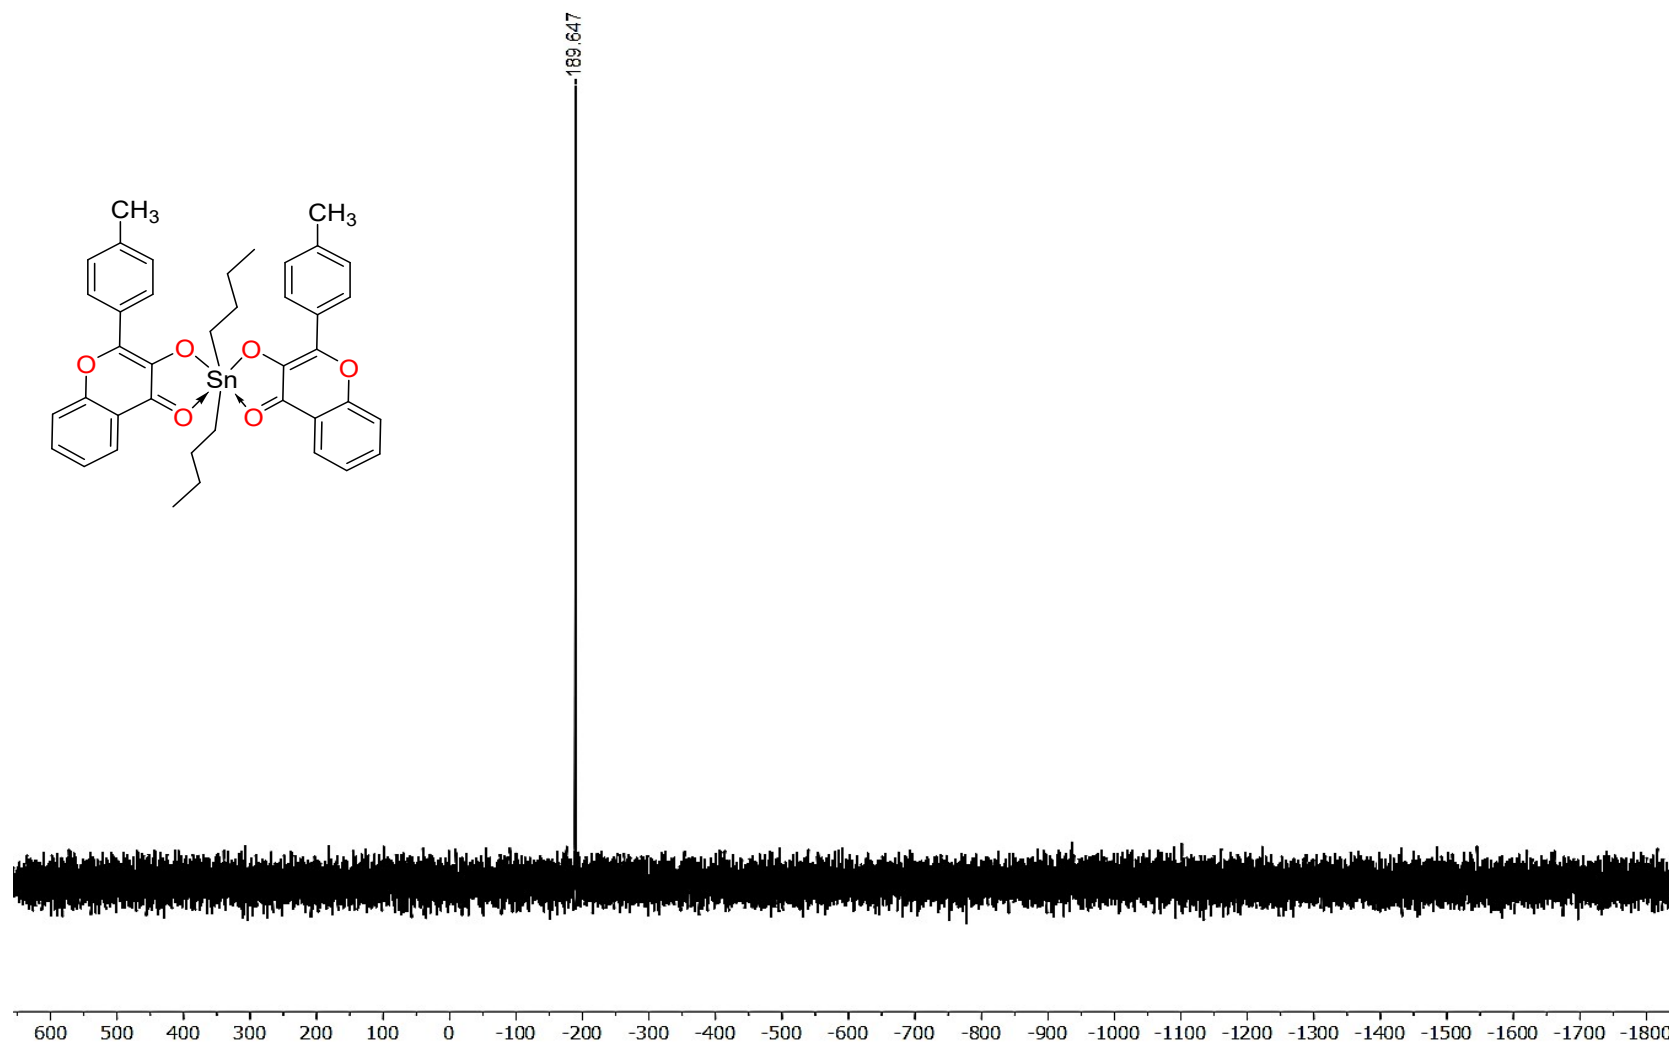

Figure S35.  $^{119}\text{Sn}$ -NMR spectrum of compound 4a.

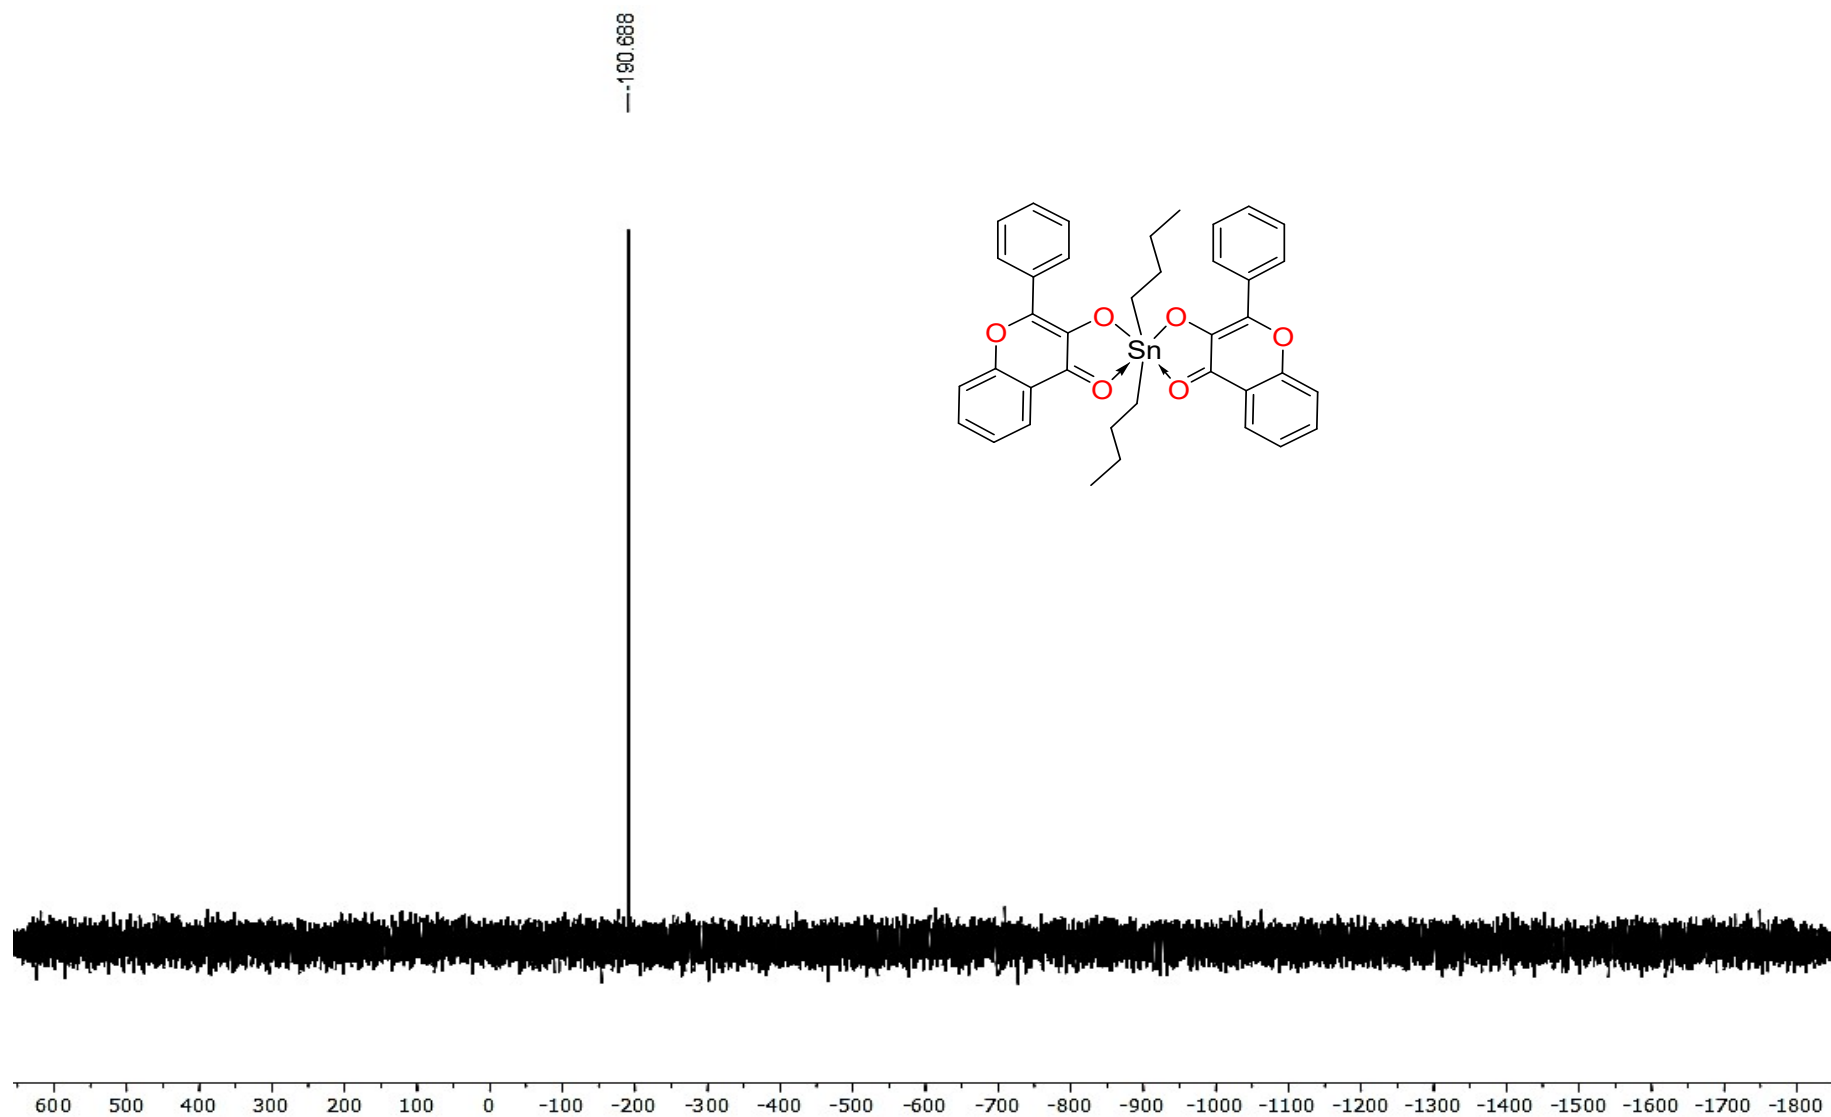

**Figure S36.**  $^{119}\text{Sn}$ -NMR spectrum of compound **5a**.

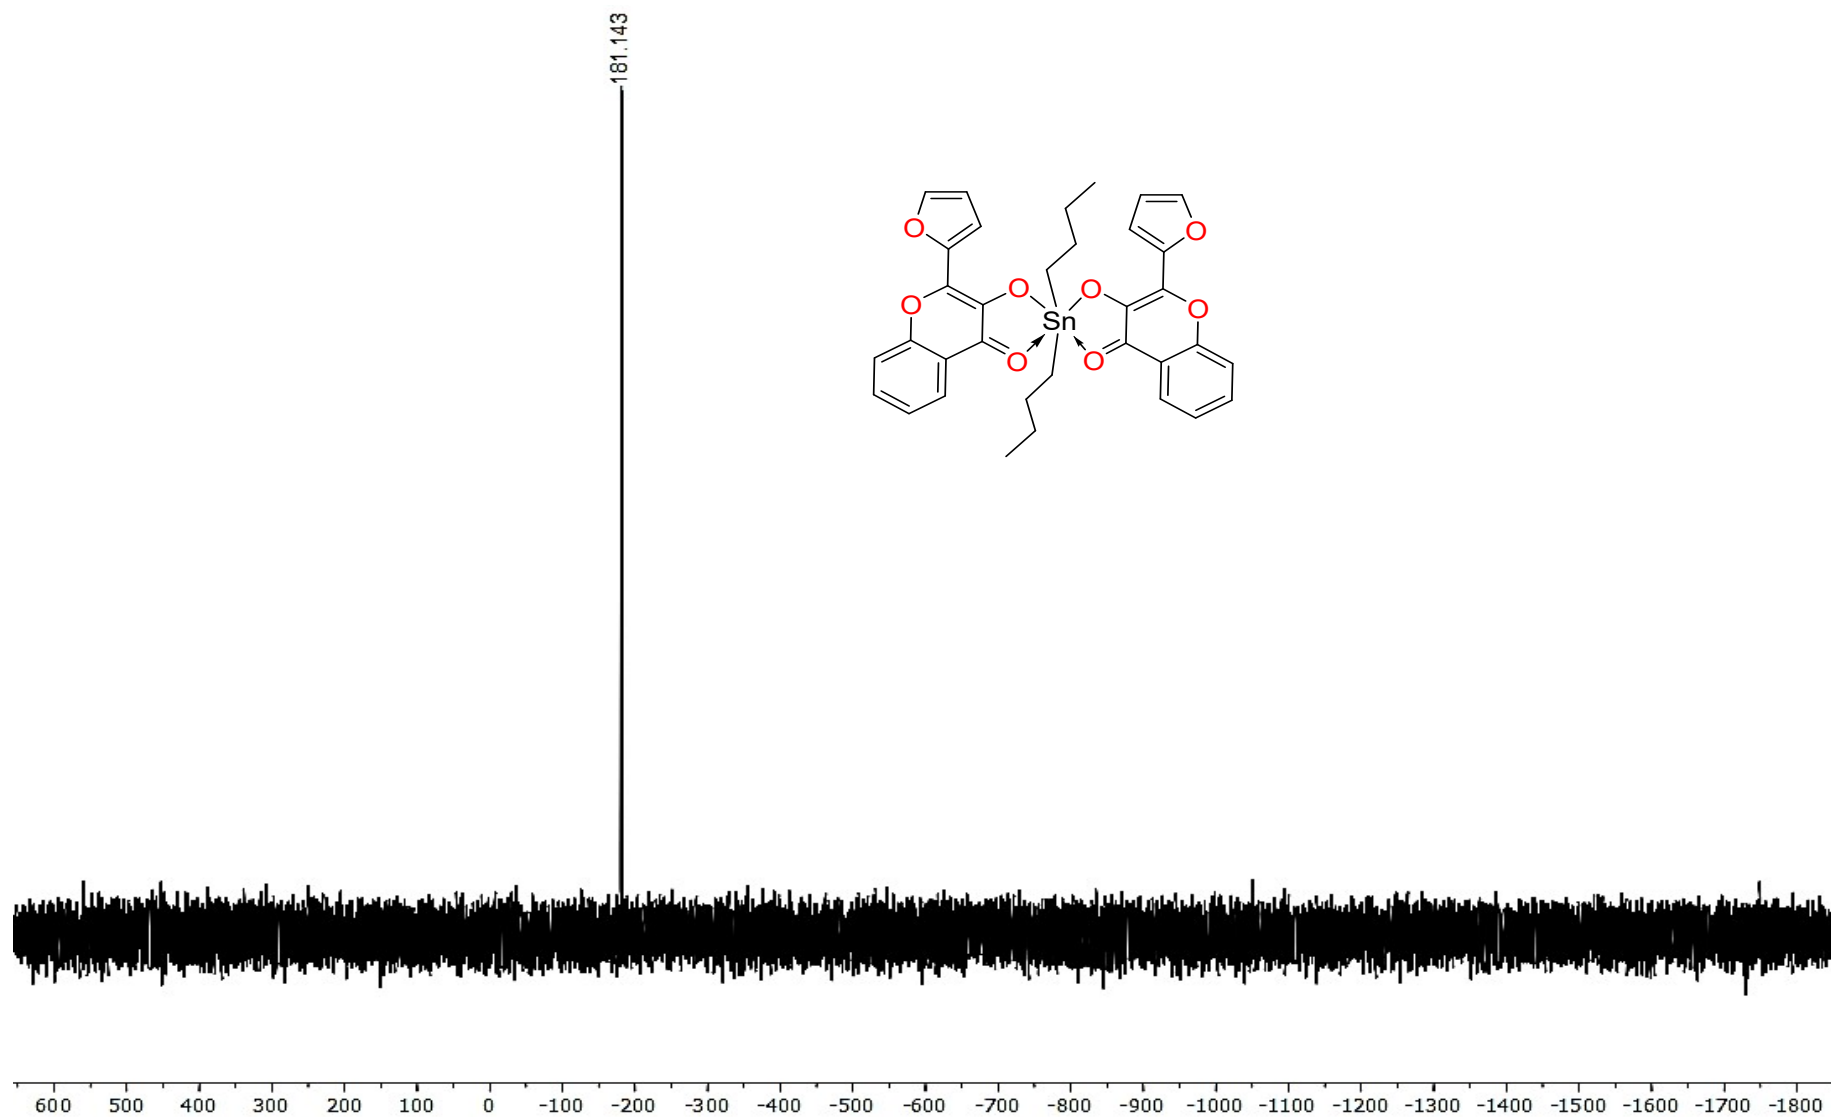

**Figure S37.**  $^{119}\text{Sn}$ -NMR spectrum of compound **6a**.

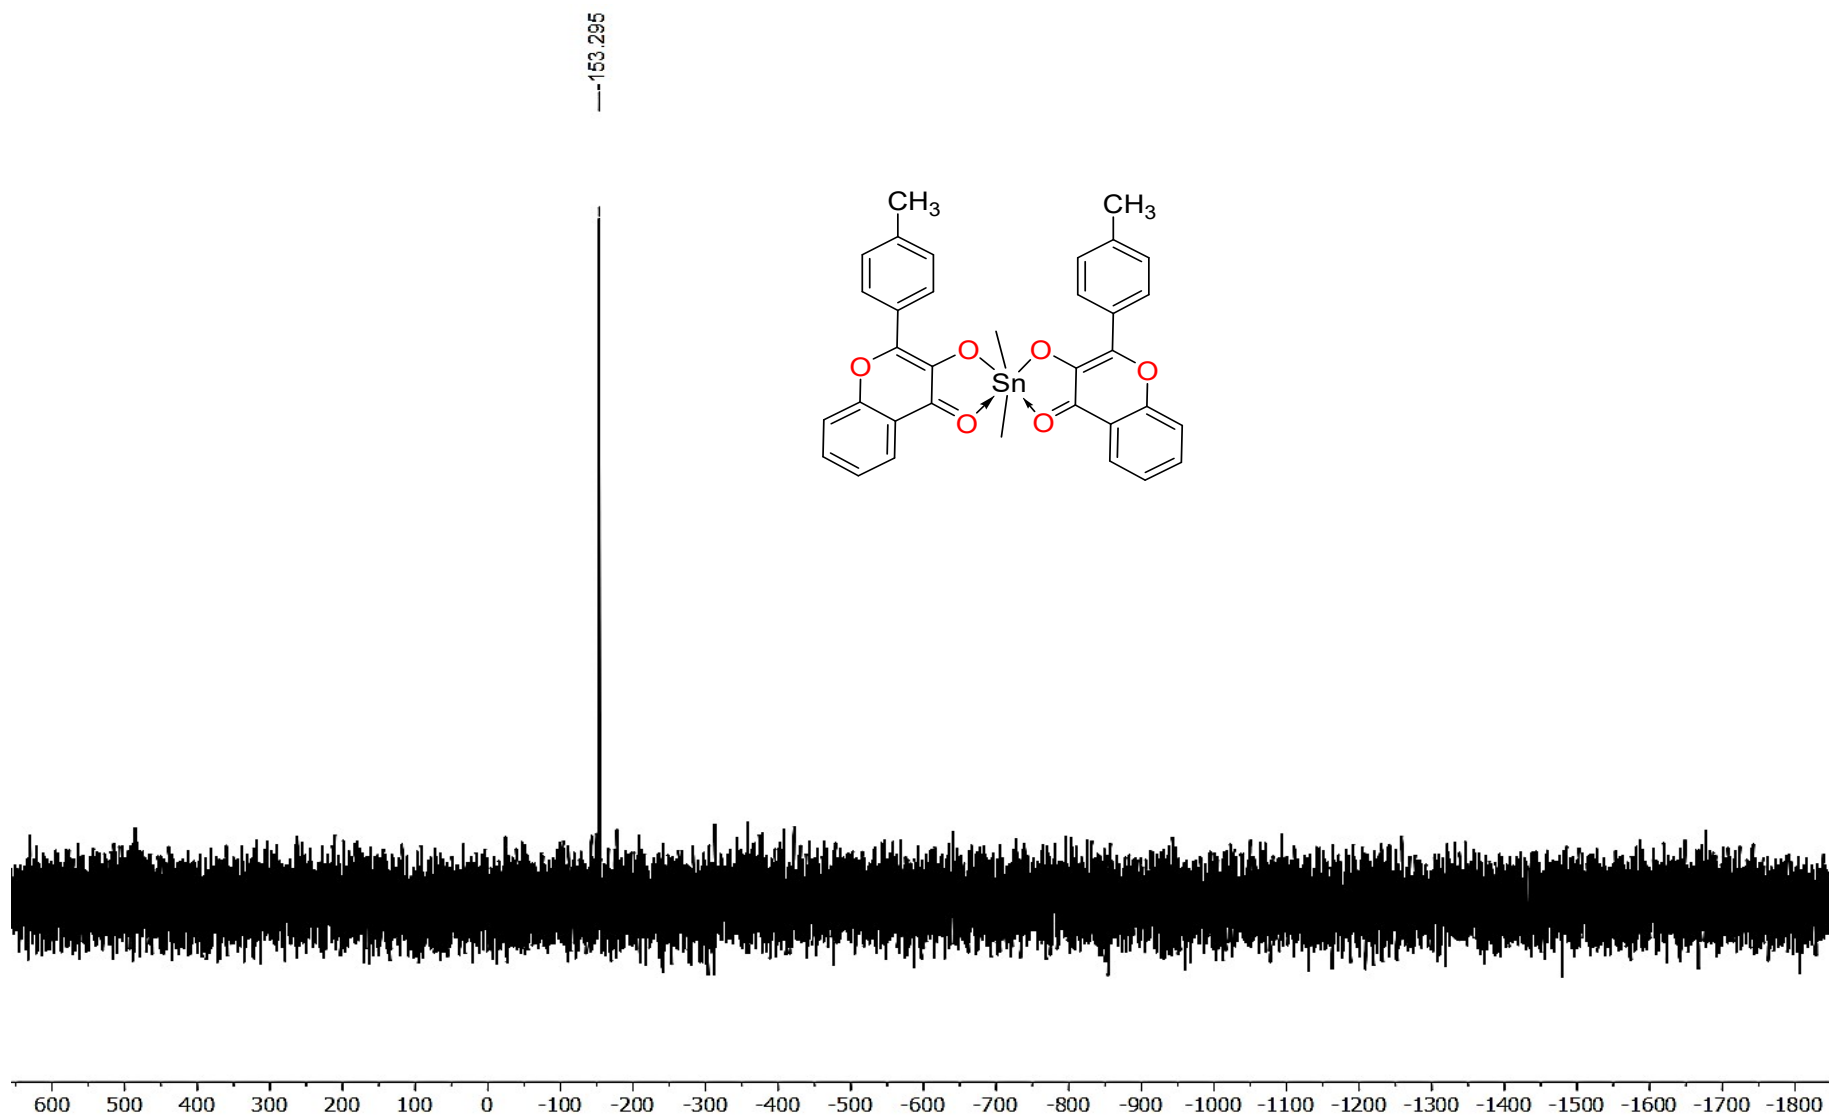

Figure S38.  $^{119}\text{Sn}$ -NMR spectrum of compound **4b**.

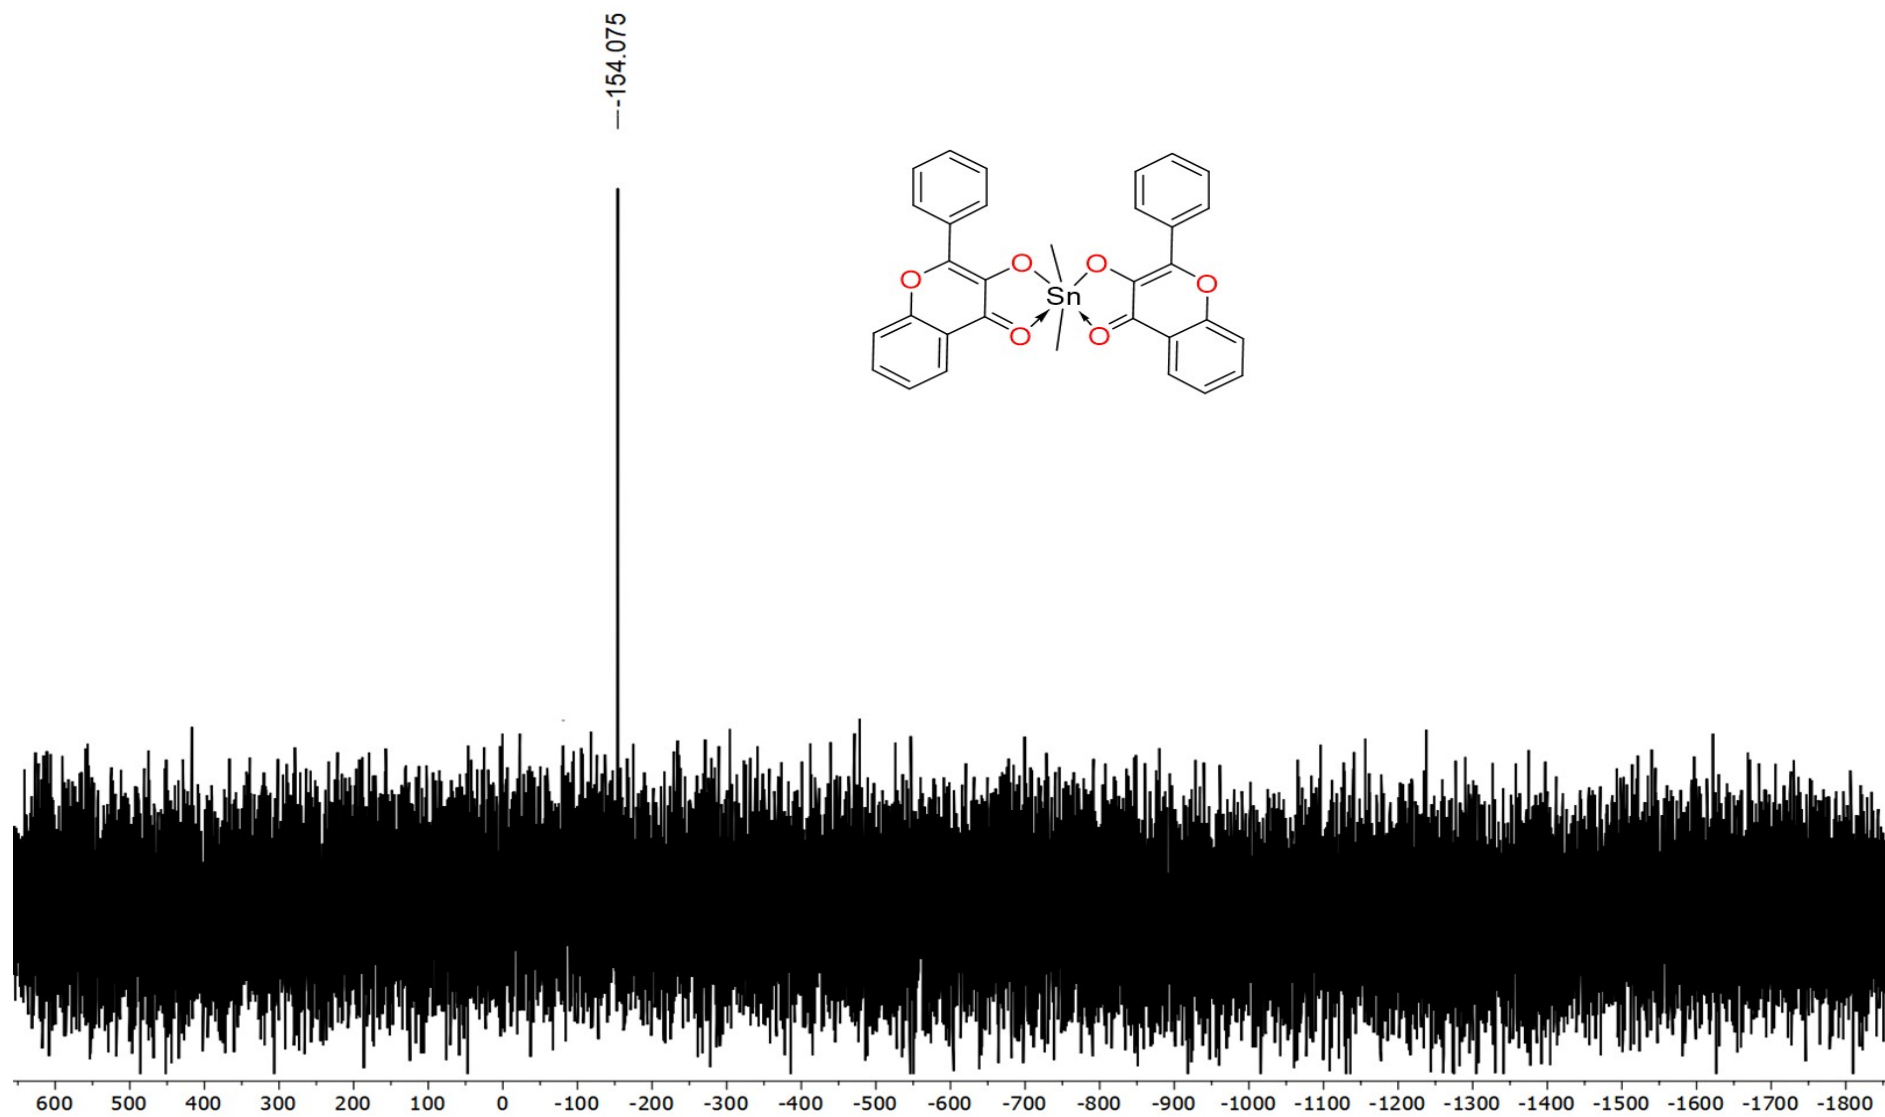

**Figure S39.**  $^{119}\text{Sn}$ -NMR spectrum of compound **5b**.

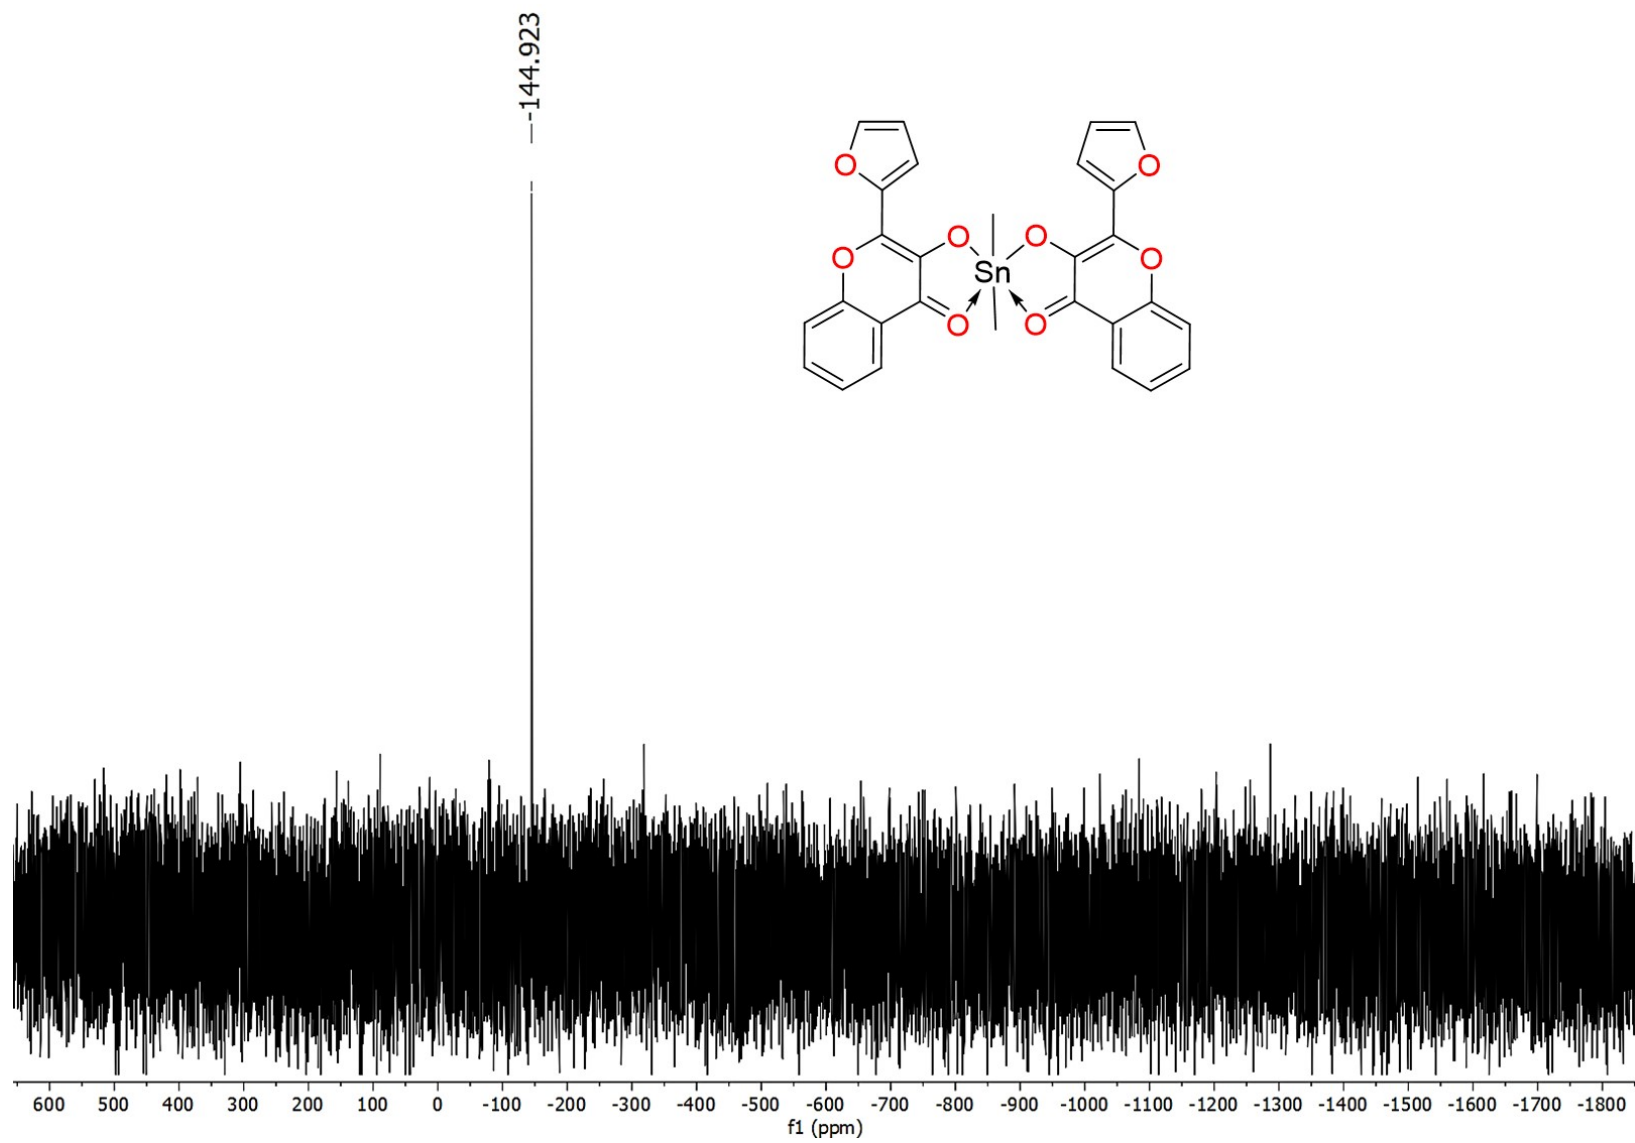

**Figure S40.**  $^{119}\text{Sn}$ -NMR spectrum of compound **6b**.

## 2.5. ESI-MS spectra of compounds

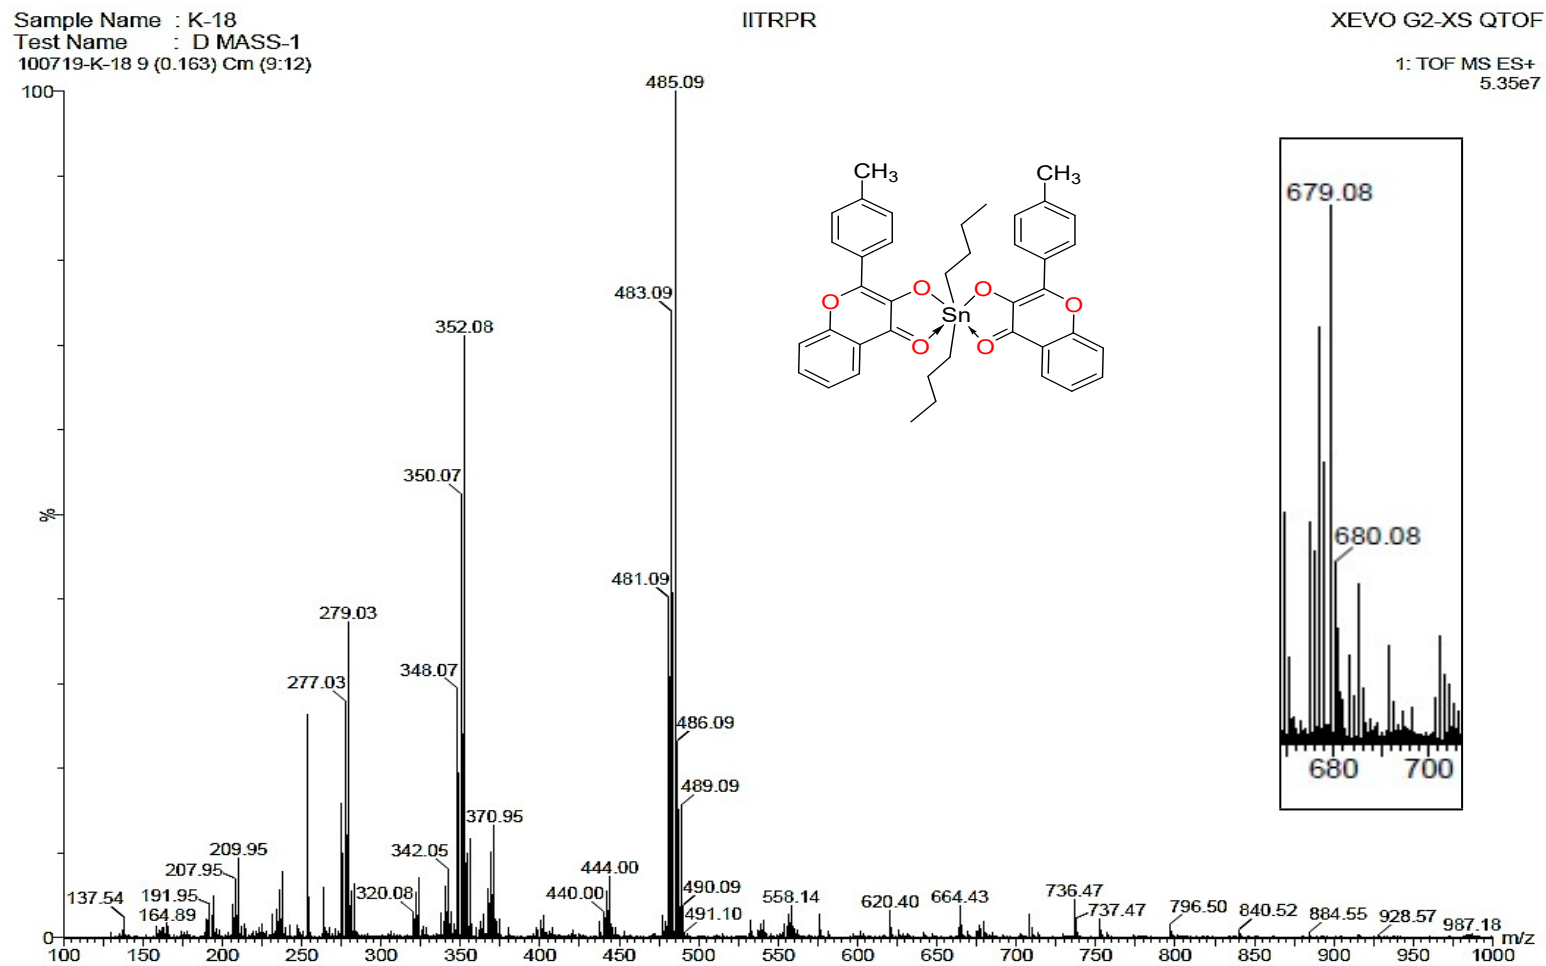

Figure S41. ESI-MS spectrum of compound 4a; Inset: Cutout of the expanded spectrum.



Sample Name : K-19  
Test Name : D MASS-1  
240919-K-19 8 (0.154) Cm (8:13)

IITRPR

XEVO G2-XS QTOF

2: TOF MS ES+  
2.46e8

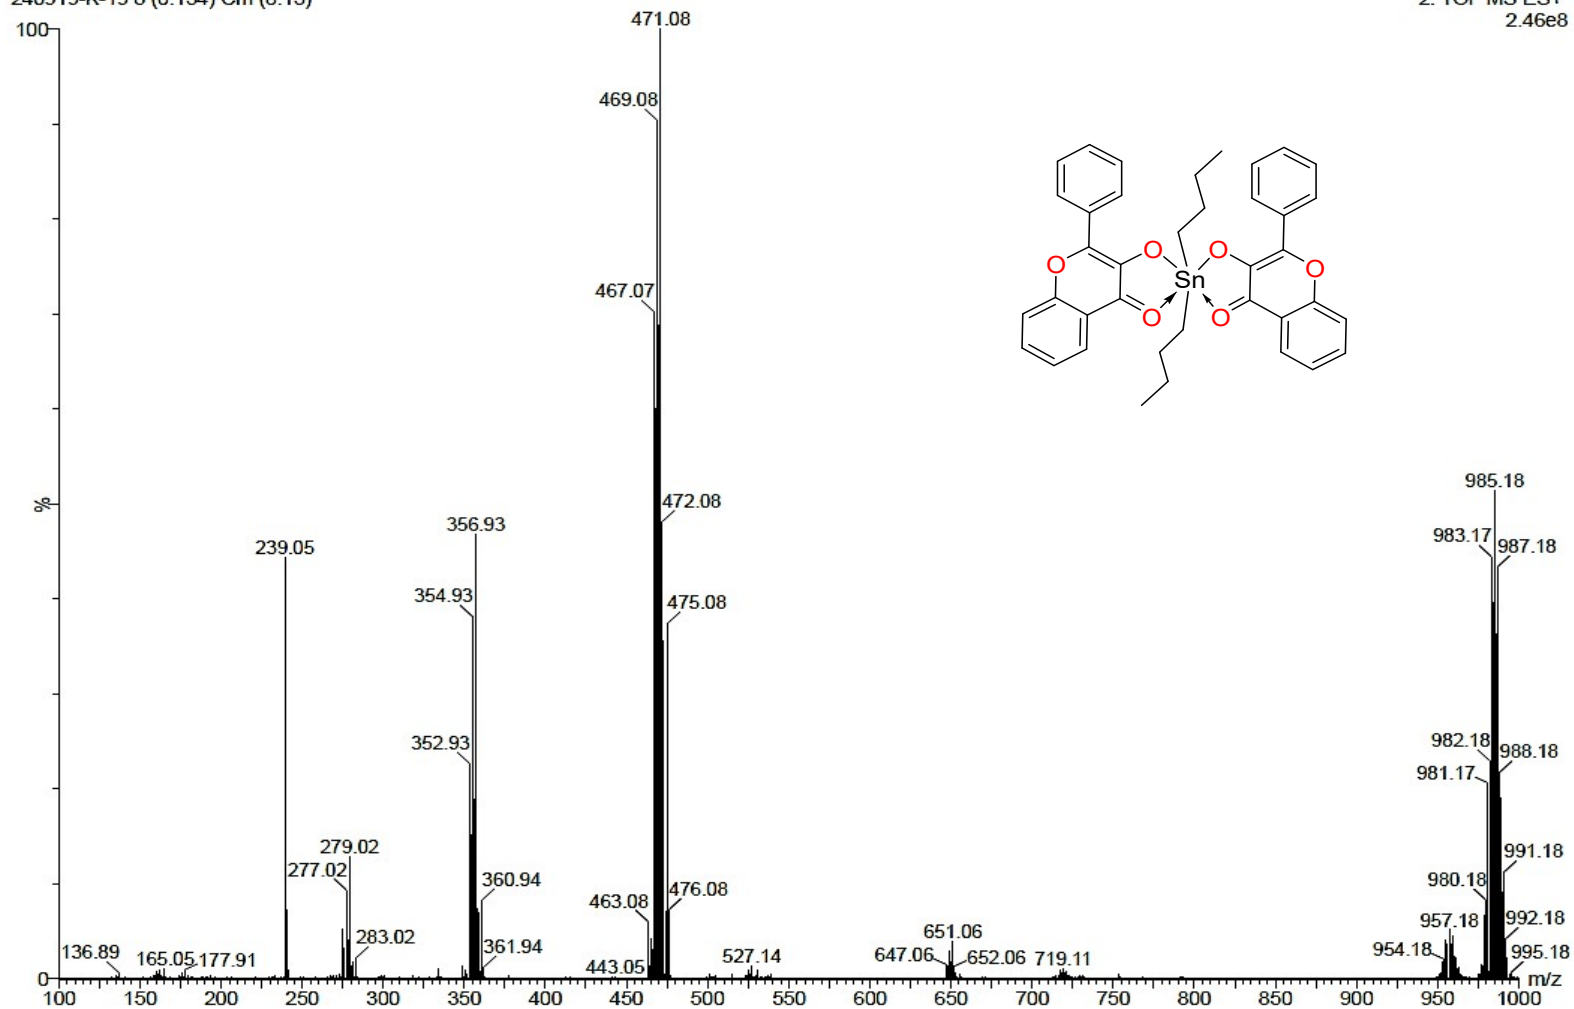

Figure S42. ESI-MS spectrum of compound 5a.

Sample Name : K-6  
Test Name : D MASS-1  
240919-K-6 7 (0.137) Cm (5:11)

IITRPR

XEVO G2-XS QTOF

2: TOF MS ES+  
7.90e7

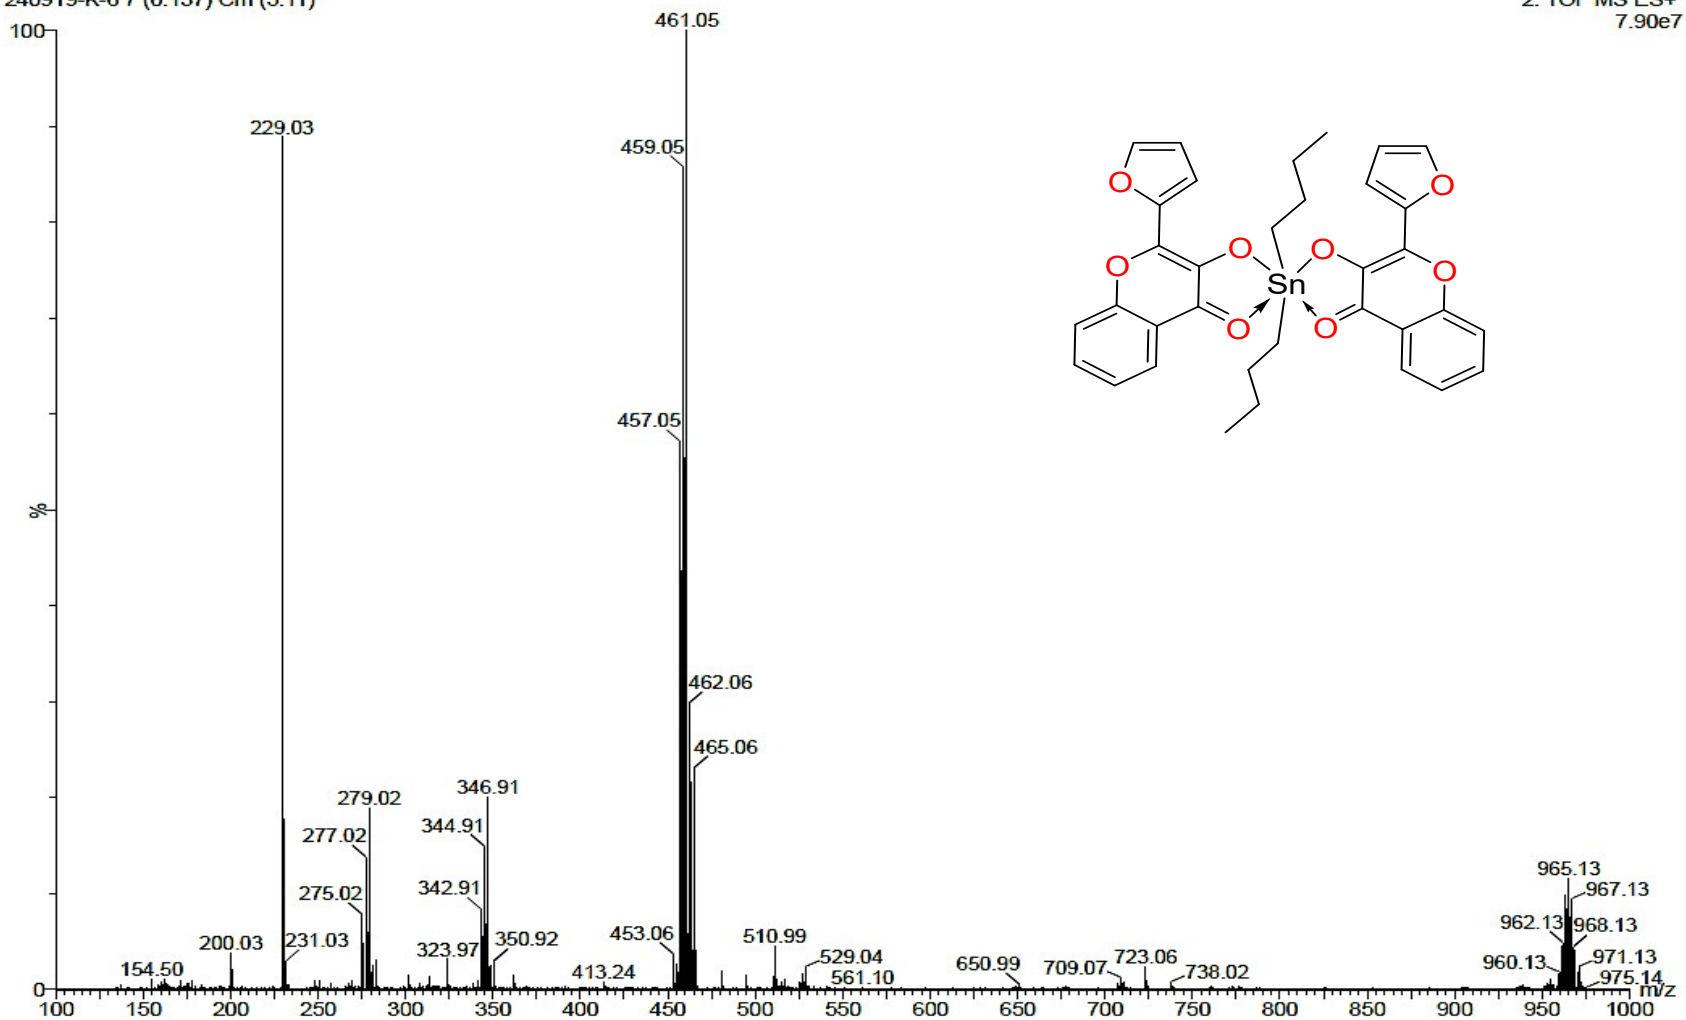

Figure S43. ESI-MS spectrum of compound 6a.

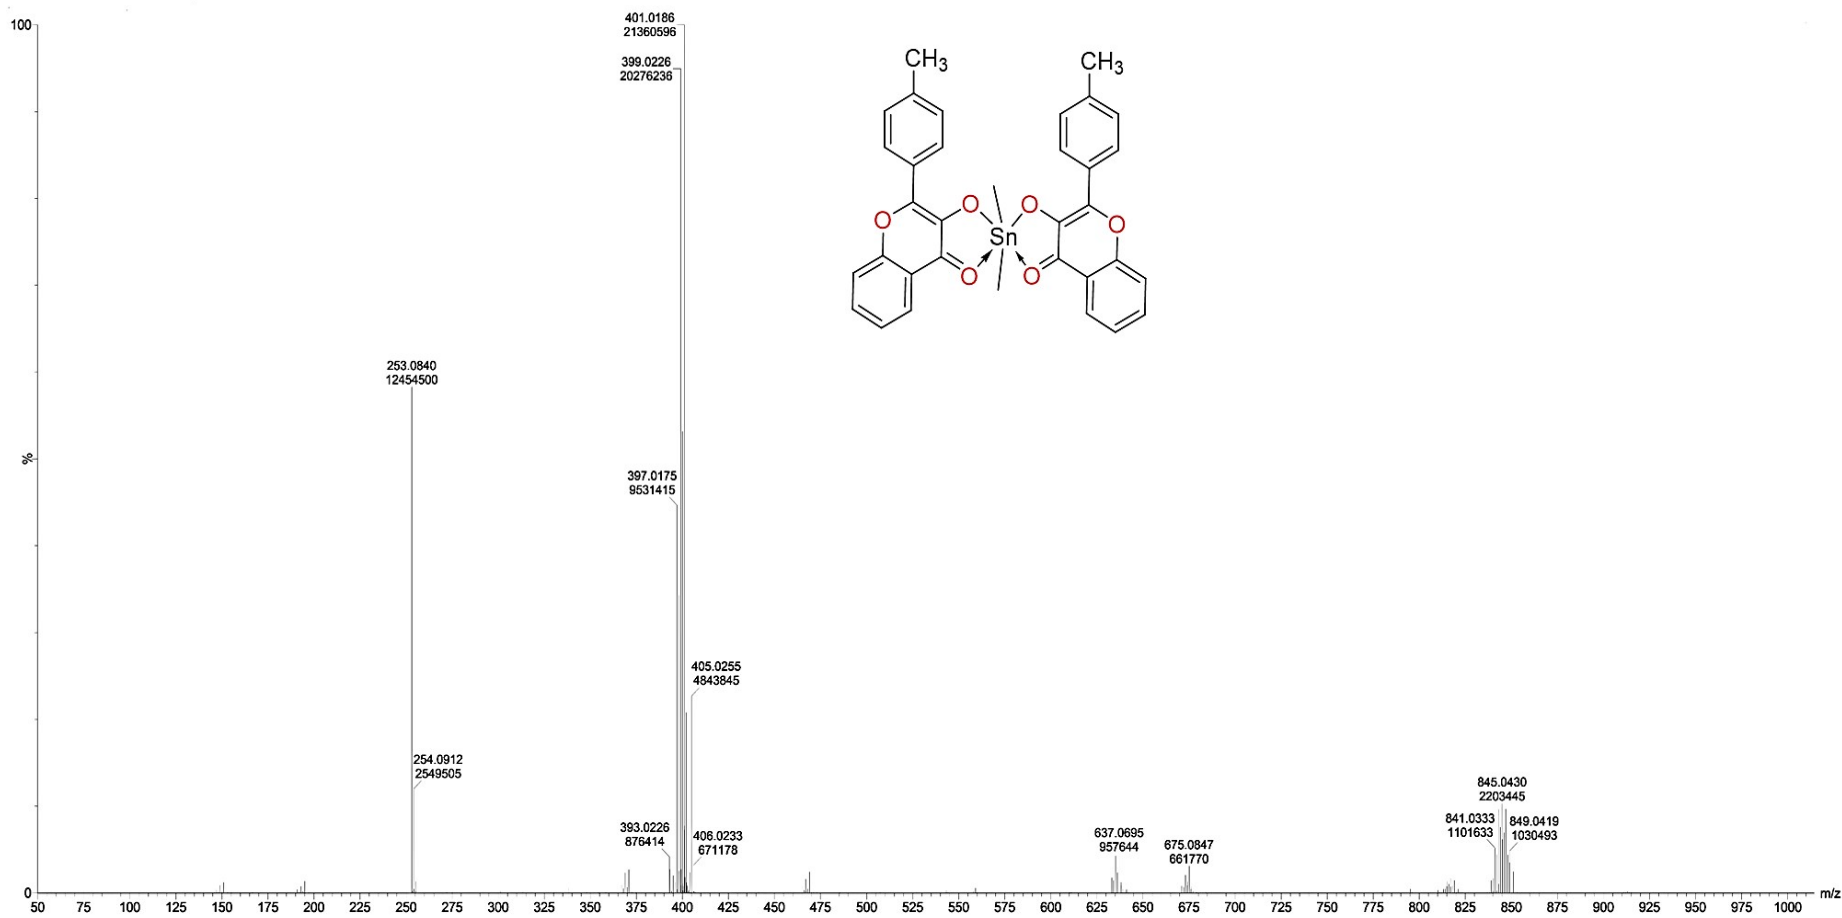

Figure S44. ESI-MS spectrum of compound 4b.

Sample Name : B-1  
Test Name : D MASS-1  
240919-B-1 8 (0.145) Cm (8:10)

IITRPR

XEVO G2-XS QTOF

1: TOF MS ES+  
8.11e7

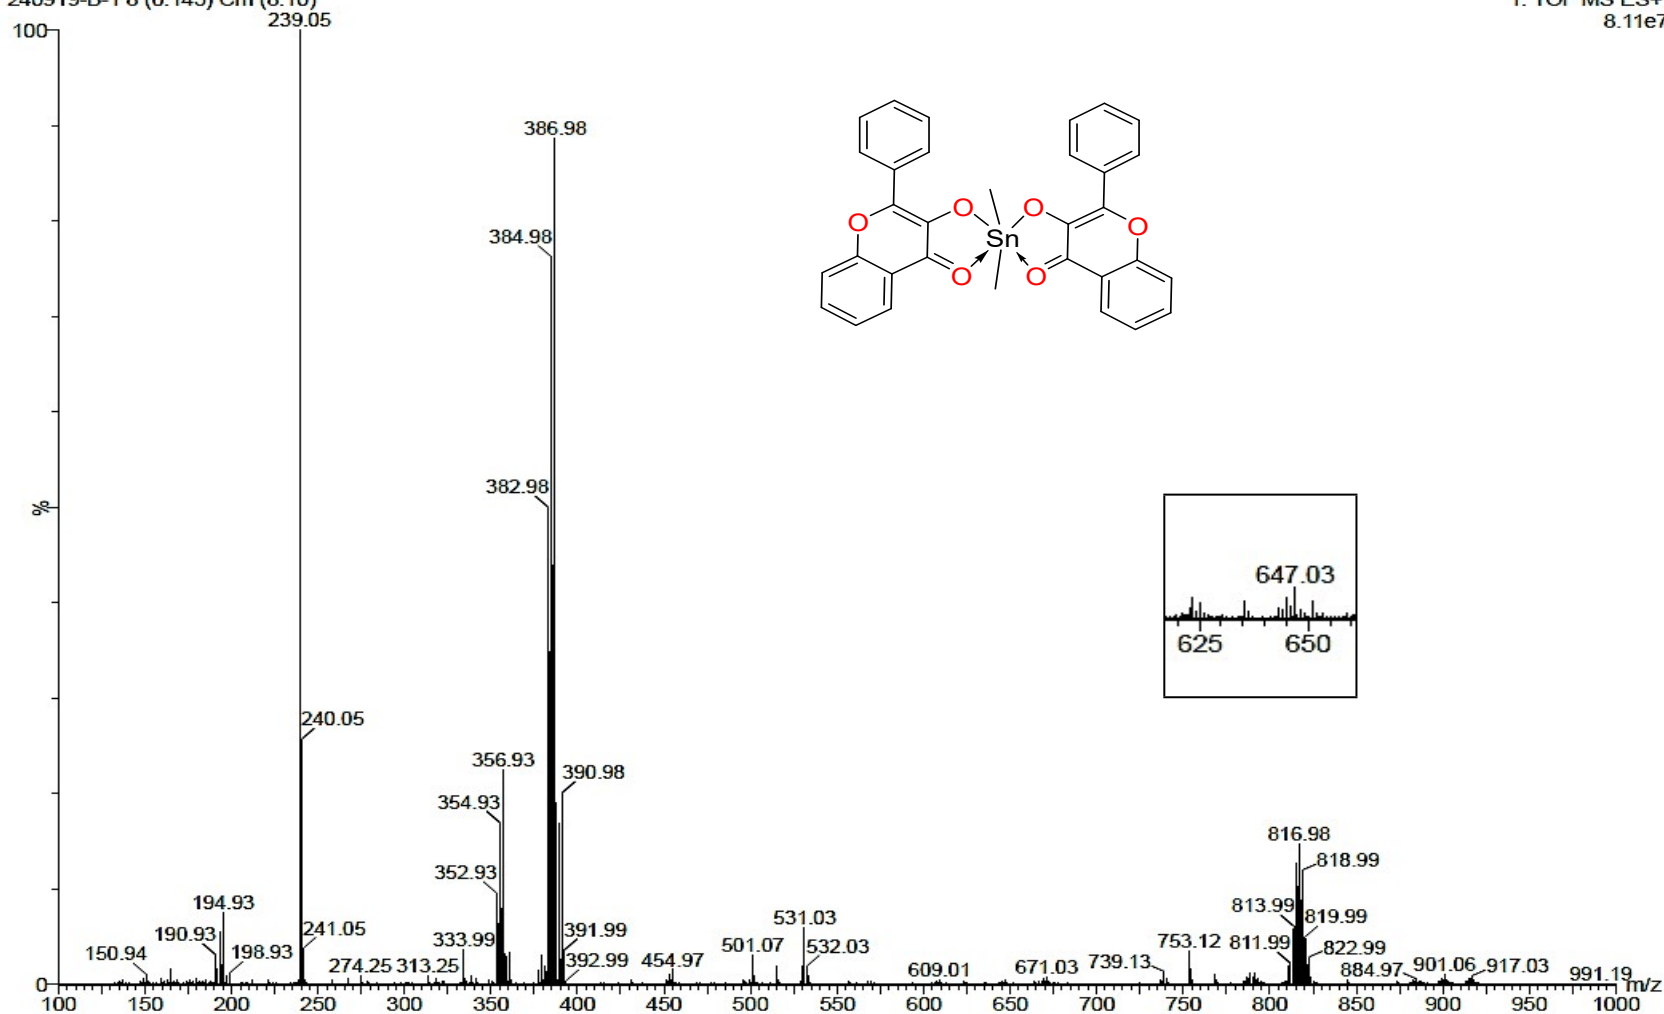

Figure S45. ESI-MS spectrum of compound 5b; Inset: Cutout of the expanded spectrum.

Sample Name : K-20  
Test Name : D MASS-1  
240919-K-20 9 (0.162) Cm (9:11)

IITRPR

XEVO G2-XS QTOF

1: TOF MS ES+  
2.94e7

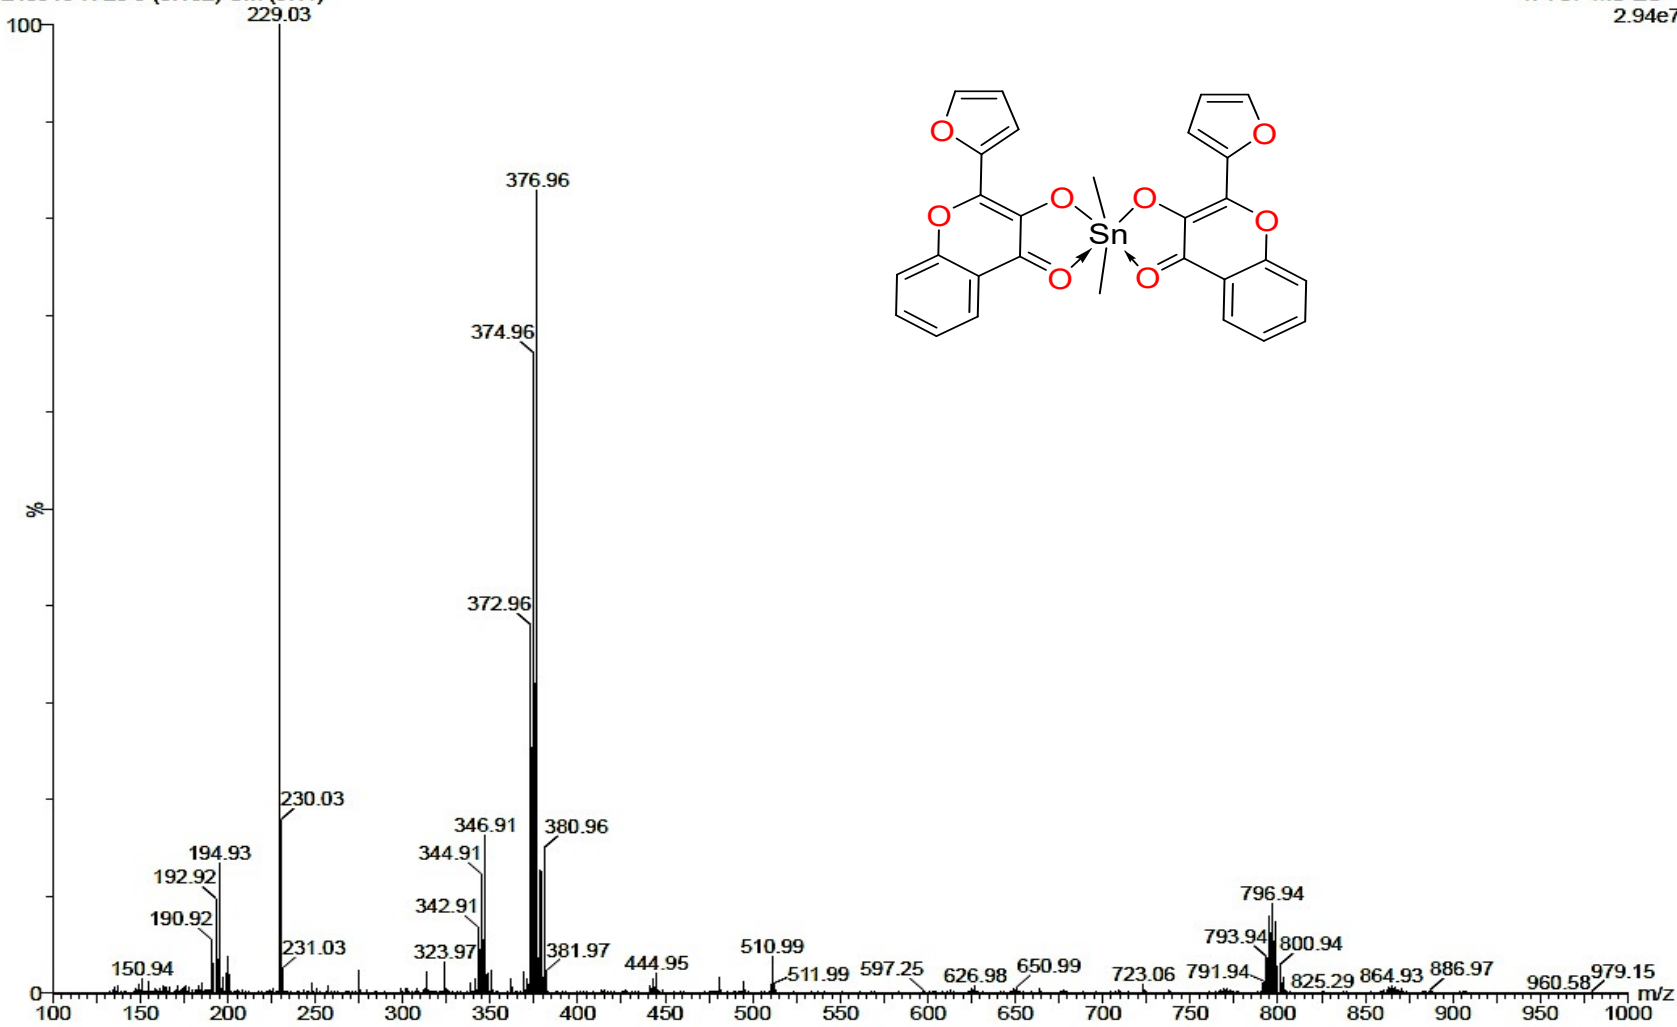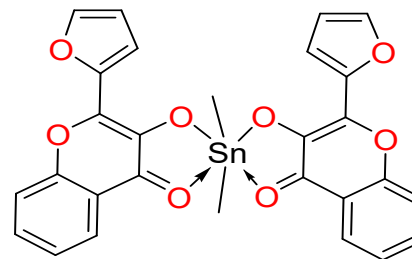

Figure S46. ESI-MS spectrum of compound 6b.
